# Supplementary material for: Cadmium Exposure Affects Serum Metabolites and Proteins in the Male Guizhou Black Goat
Source: Animals (Basel). 2023 Aug 25;13(17):2705. doi: 10.3390/ani13172705 (PMC10487163; doi:10.3390/ani13172705)
Supplement: Supplementary file 1 [file animals-13-02705-s001.zip]

Archive with 5 entries (5 files):
- Supplement Tables and Figures.pdf
- Supplementary file S1.pdf
- Table S1 (POS+NEGú¬.xlsx
- Table S2 (CSM-CKS_kegg_enrich).xlsx
- Table S3 (PRO).xlsx
