# Supplementary material for: Cadmium Exposure Affects Serum Metabolites and Proteins in the Male Guizhou Black Goat
Source: Animals (Basel). 2023 Aug 25;13(17):2705. doi: 10.3390/ani13172705 (PMC10487163; doi:10.3390/ani13172705)
Supplement: Supplementary file 1 [file animals-13-02705-s001.zip › Supplement Tables and Figures.pdf]

**Figure S1.** Flowchart of the metabolomics and proteomics experiments

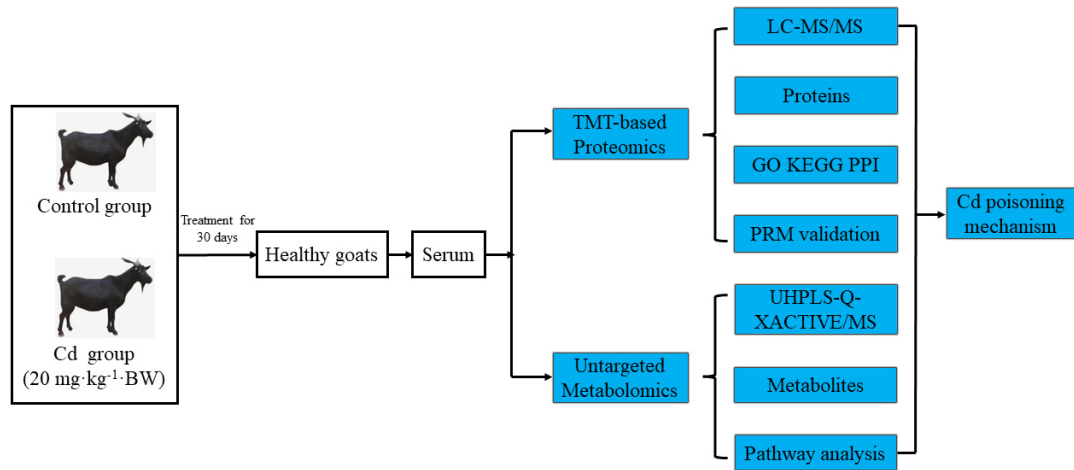

**Figure S2.** The representative total ion chromatograms of the serum sample analysed by the HILIC UHPLC-Q-EXACTIVE/MS. (a): Quality control (QC); (b): the control group; (c): Cd group.

(a)

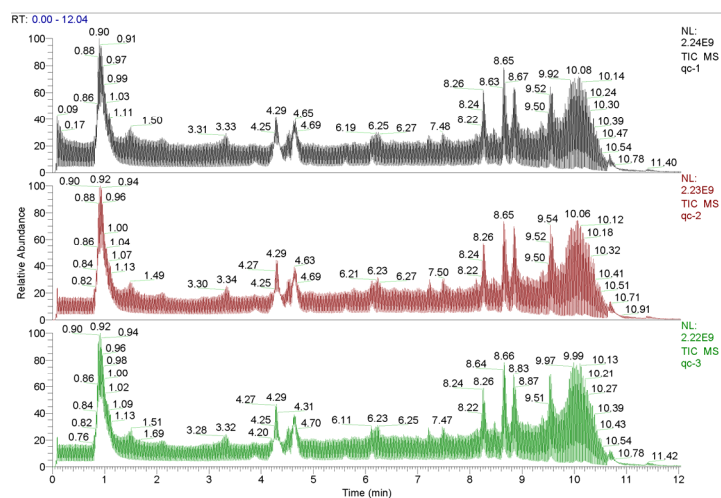

(b)

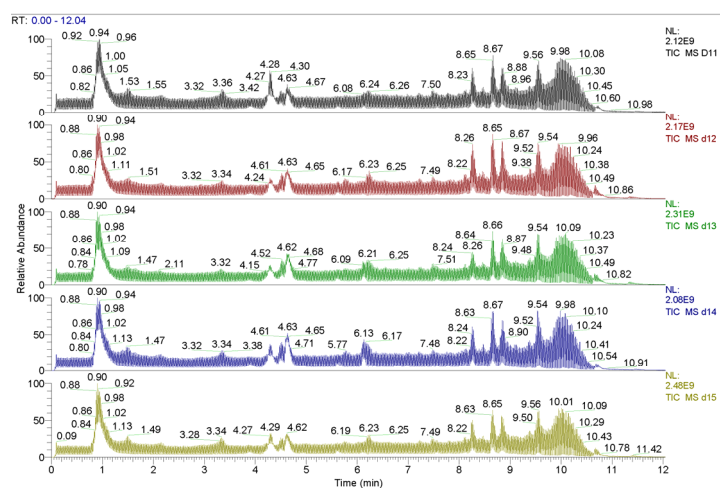

(c)

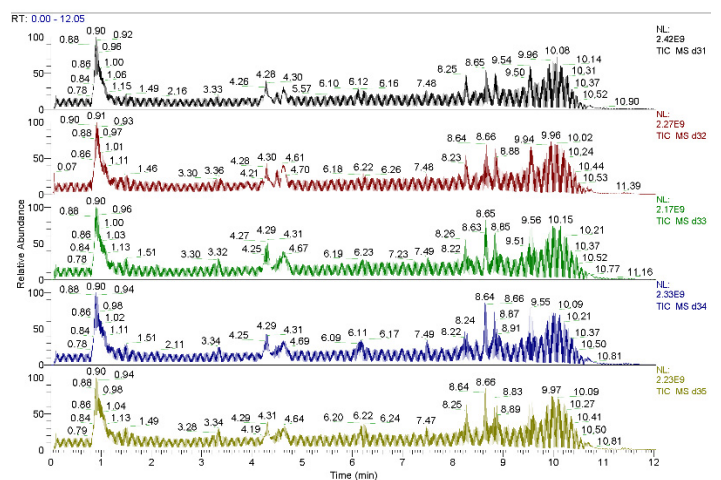

**Figure S3.** PCA score plots derived from HILIC UHPLC-Q-EXACTIVE/MS in positive (a) and negative (b) ionization modes.

**(a)**

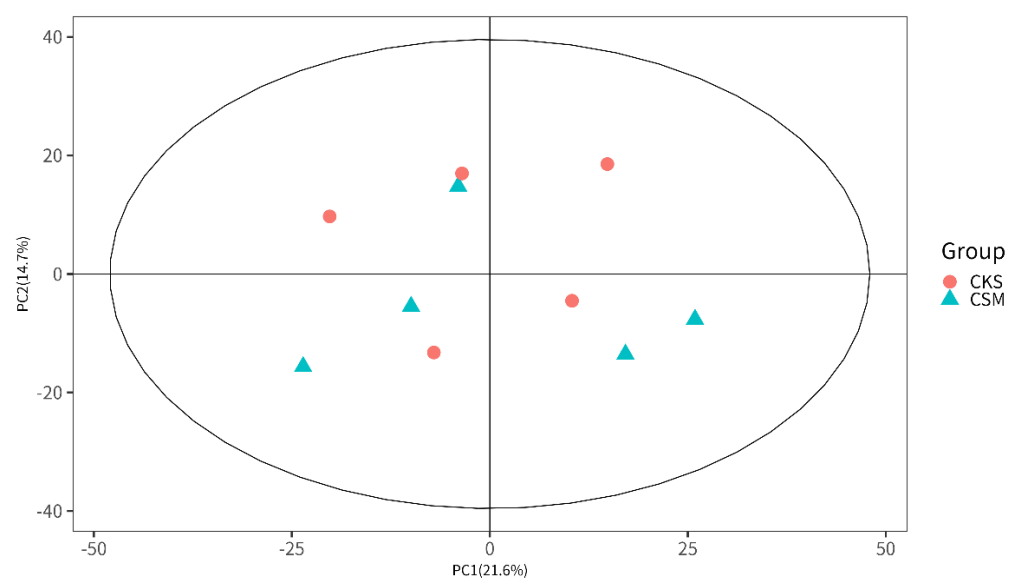

**(b)**

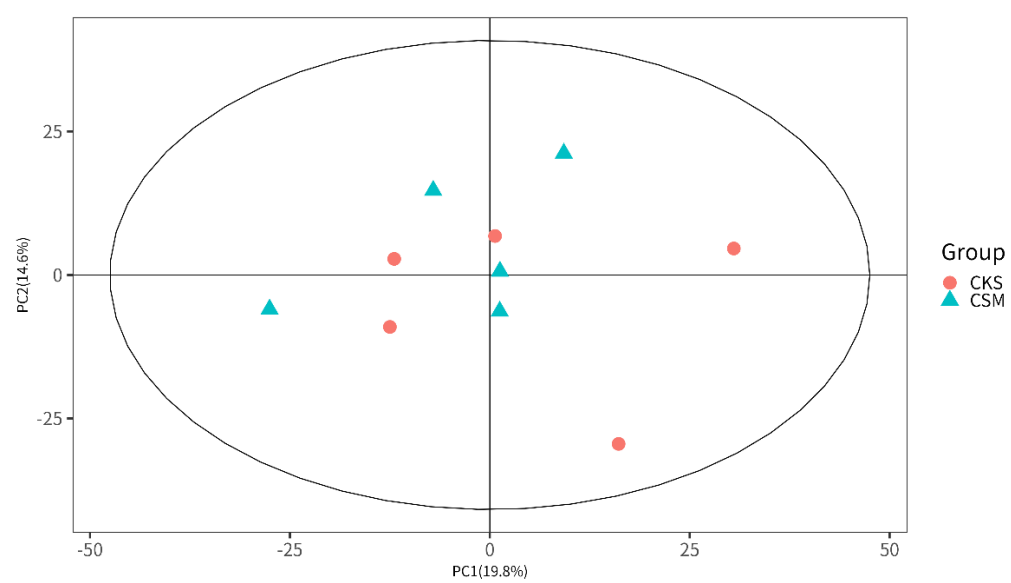

**Figure S4.** PLS-DA score plots derived from HILIC UHPLC-Q-Exactive/MS in positive (a) and negative (b) ionization modes.

**(a)**

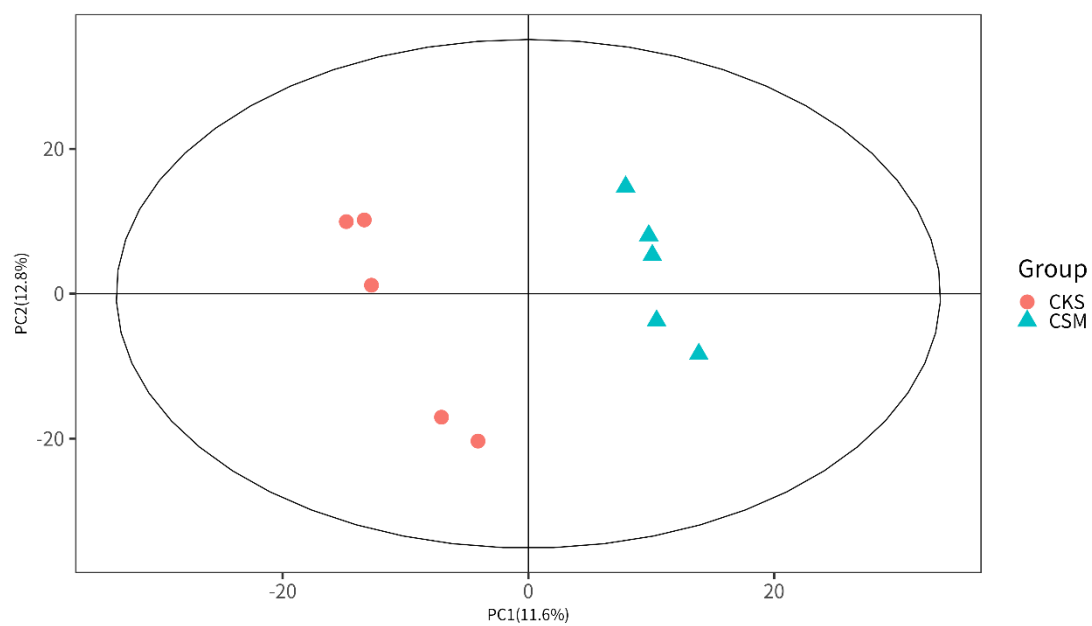

**(b)**

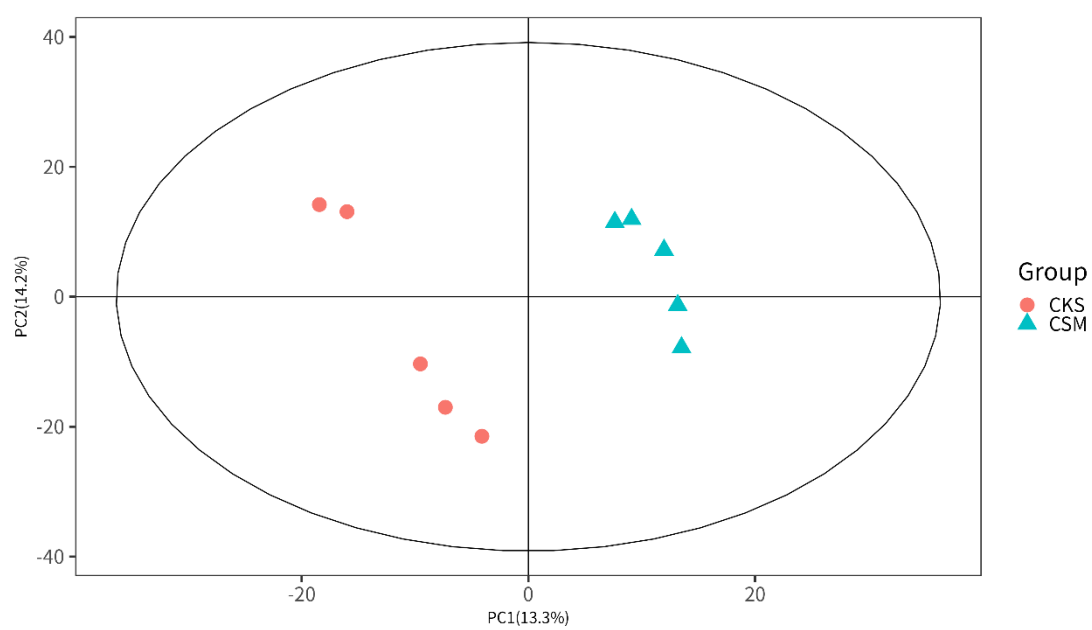

**Figure S5.** Bubble diagram of top-10 KEGG enrichment results according to their P-values.

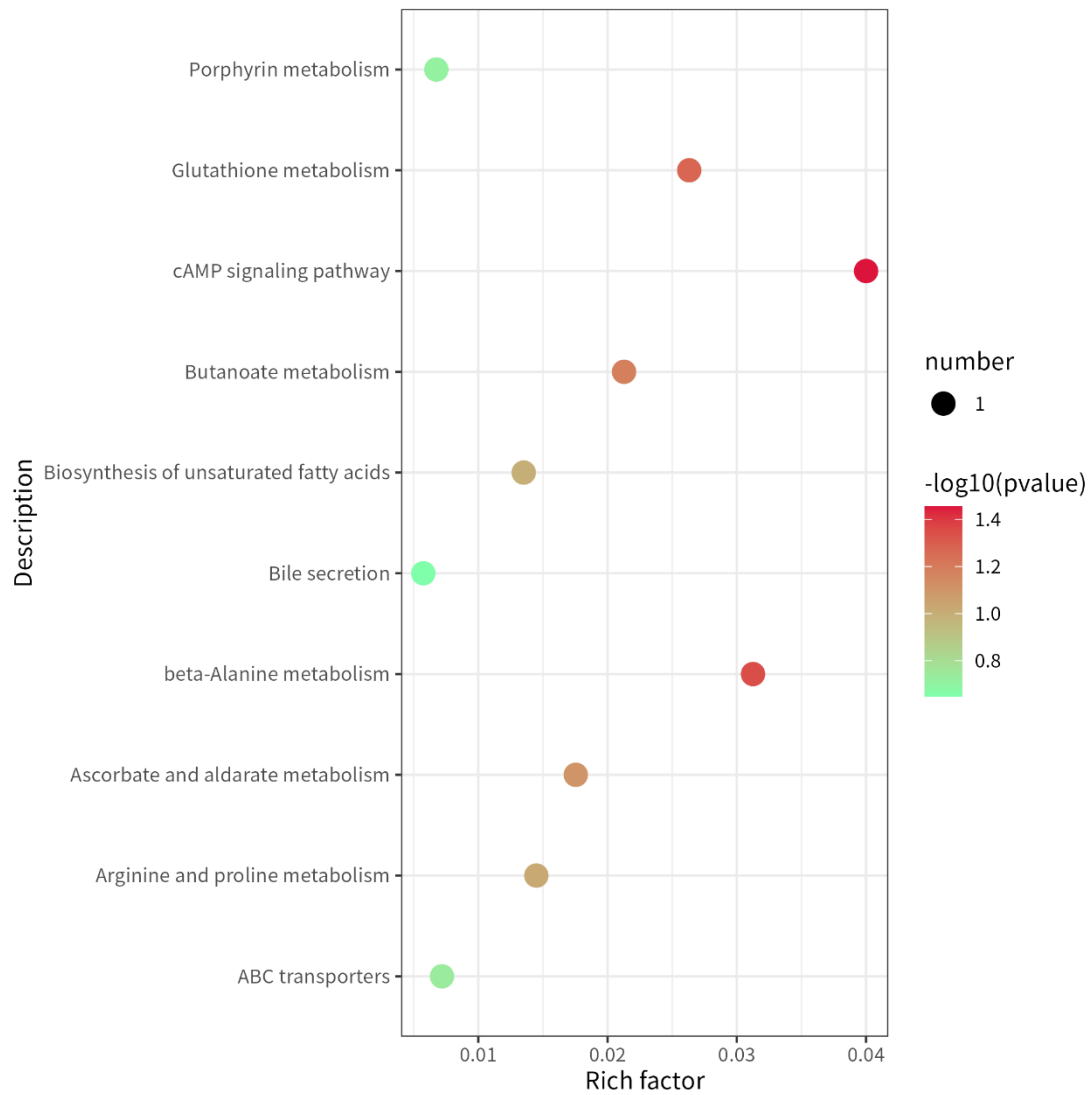

**Figure S6.** Gene Ontology. (a): Cellular compartments, CC; (b): Molecular function, MF; (c): Biological process, BP.

**(a)**

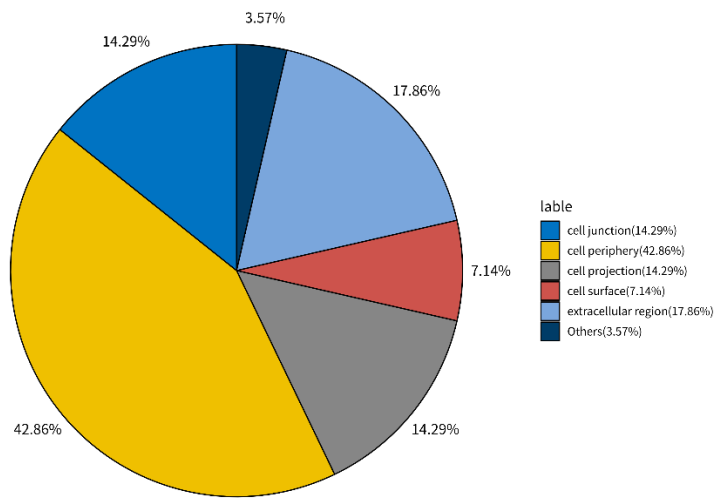

**(b)**

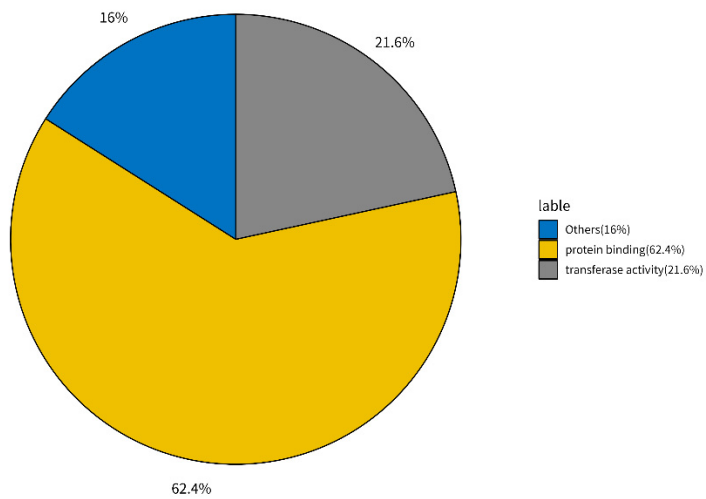

**(c)**

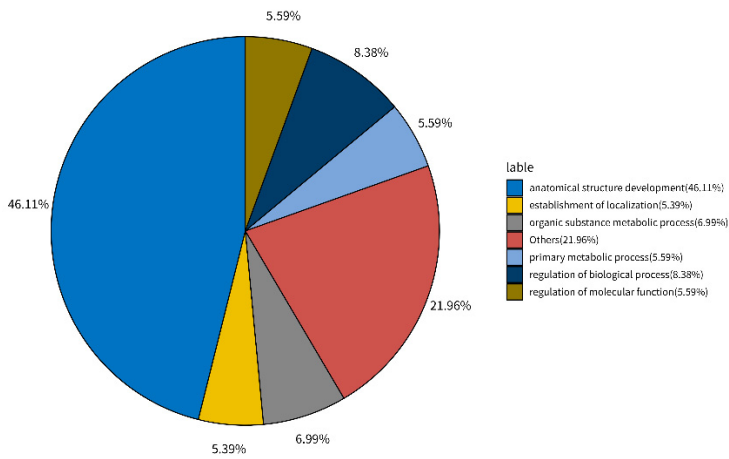

**Figure S7.** (a) Network of significant altered metabolic pathways in response to Cd poisoning in goats. According to KEGG, with the integration of proteomics and metabolomics, the network for mechanism explanation was established. Metabolite–protein interaction network based on the differential metabolites and DEPs for ESB-EC vs. non-ESB-EC in positive mode. The squares represent differential metabolites. The circles represent differential protein genes. The red/green box represents the protein mapped to the same pathway, and the blue /yellow circle represents the metabolite mapped to the same pathway, where red/ yellow represents the up-regulated protein/metabolite, and green/blue represents the down-regulated protein / metabolite.

(b) The correlated thermogram analysis of proteins and metabolites. Each row represents a differential protein and each column represents a differential metabolite. Each cell represents a protein associated with a metabolite, including correlation coefficient corr and correlation p value (pvalue) information. The value range of correlation coefficient corr is (- 1, + 1). In the figure, it is represented by color, corr > 0 indicates positive correlation, and it is represented by red; corr < 0 indicates negative correlation, and blue indicates that the darker the color, the greater the correlation; corr = 0 indicates that there is no correlation, which is represented by yellow. P value reflects the significant level of correlation. P value < 0.05 indicates that there is a significant correlation between protein and metabolites, expressed by "\*\*".

(a)

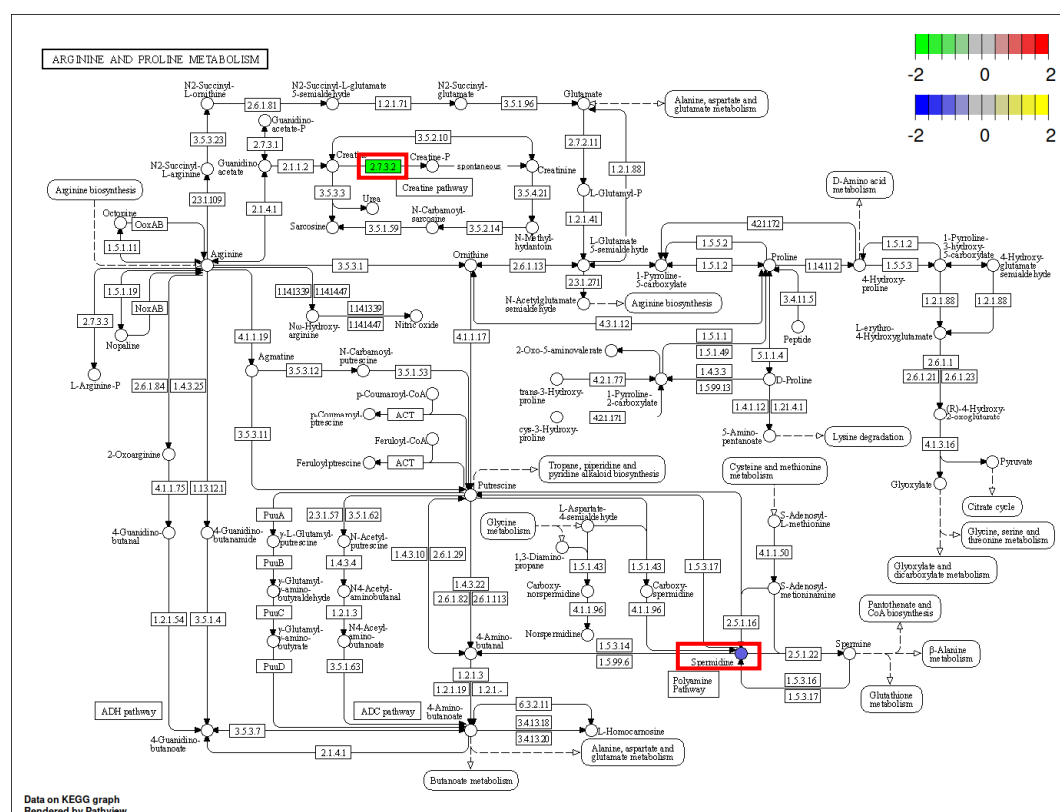



(b)

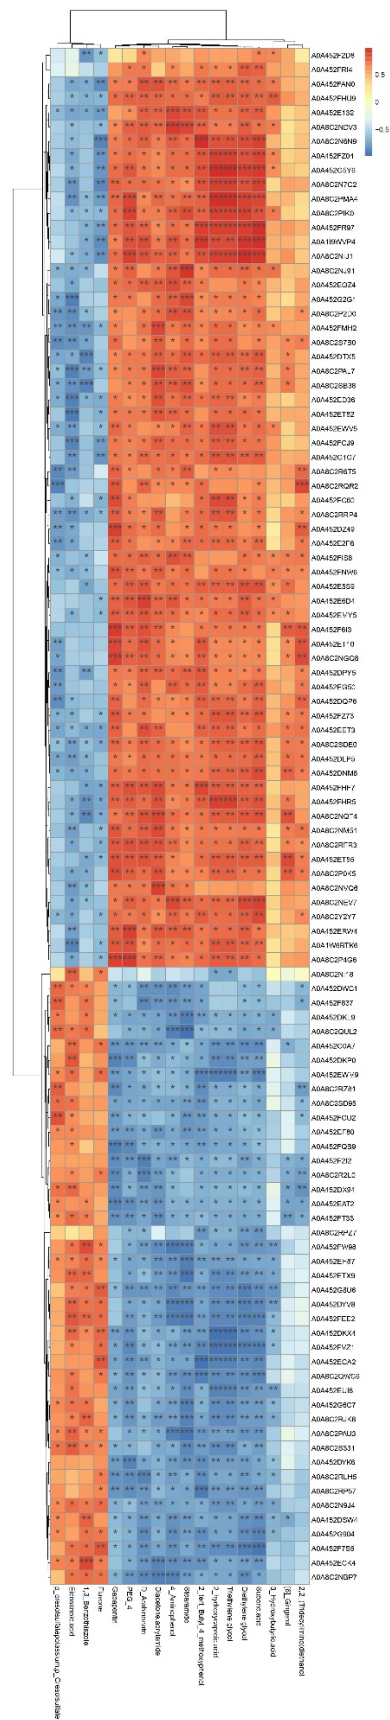

**Table S4.** Enriched KEGG pathways of differentially abundant proteins in comparison with the control group.

| Pathway ID | Pathway name                             | Proteins          | Count | P-value_adjusted |
|------------|------------------------------------------|-------------------|-------|------------------|
| chx00360   | Phenylalanine metabolism                 | PAO 2             | 2     | 0.014            |
| chx00410   | beta-Alanine metabolism                  | PAO 2             | 2     | 0.014            |
| chx00350   | Tyrosine metabolism                      | PAO 2             | 2     | 0.014            |
| chx00260   | Glycine, serine and threonine metabolism | PAO 2             | 2     | 0.014            |
| chx05226   | Gastric cancer                           | CDH17 1;WNT10B 1  | 2     | 0.113            |
| chx05225   | Hepatocellular carcinoma                 | GSTA2 1;WNT10B 1  | 2     | 0.124            |
| chx05205   | Proteoglycans in cancer                  | COL1A1 1;WNT10B 1 | 2     | 0.137            |
| chx05415   | Diabetic cardiomyopathy                  | COL1A1 1;GAPDH 1  | 2     | 0.137            |
| chx04979   | Cholesterol metabolism                   | APOH 1            | 1     | 0.192            |
| chx05165   | Human papillomavirus infection           | COL1A1 1;WNT10B 1 | 2     | 0.192            |
| chx00330   | Arginine and proline metabolism          | CKM 1             | 1     | 0.192            |
| chx05010   | Alzheimer disease                        | GAPDH 1;WNT10B 1  | 2     | 0.192            |
| chx00480   | Glutathione metabolism                   | GSTA2 1           | 1     | 0.192            |
| chx05217   | Basal cell carcinoma                     | WNT10B 1          | 1     | 0.192            |
| chx00010   | Glycolysis / Gluconeogenesis             | GAPDH 1           | 1     | 0.192            |
| chx00982   | Drug metabolism - cytochrome P450        | GSTA2 1           | 1     | 0.192            |
| chx05204   | Chemical carcinogenesis - DNA adducts    | GSTA2 1           | 1     | 0.192            |

|          |                                               |          |   |       |
|----------|-----------------------------------------------|----------|---|-------|
| chx00980 | Metabolism of xenobiotics by cytochrome P450  | GSTA2 1  | 1 | 0.192 |
| chx01230 | Biosynthesis of amino acids                   | GAPDH 1  | 1 | 0.192 |
| chx01524 | Platinum drug resistance                      | GSTA2 1  | 1 | 0.192 |
| chx00983 | Drug metabolism - other enzymes               | GSTA2 1  | 1 | 0.192 |
| chx03008 | Ribosome biogenesis in eukaryotes             | NXT2 1   | 1 | 0.192 |
| chx04512 | ECM-receptor interaction                      | COL1A1 1 | 1 | 0.196 |
| chx03015 | mRNA surveillance pathway                     | NXT2 1   | 1 | 0.196 |
| chx04916 | Melanogenesis                                 | WNT10B 1 | 1 | 0.196 |
| chx04933 | AGE-RAGE signaling pathway in diabetic        | COL1A1 1 | 1 | 0.196 |
| chx04066 | HIF-1 signaling pathway                       | GAPDH 1  | 1 | 0.196 |
| chx05146 | Amoebiasis                                    | COL1A1 1 | 1 | 0.196 |
| chx03013 | Nucleocytoplasmic transport                   | NXT2 1   | 1 | 0.196 |
| chx01200 | Carbon metabolism                             | GAPDH 1  | 1 | 0.196 |
| chx04611 | Platelet activation                           | COL1A1 1 | 1 | 0.202 |
| chx04926 | Relaxin signaling pathway                     | COL1A1 1 | 1 | 0.202 |
| chx04974 | Protein digestion and absorption              | COL1A1 1 | 1 | 0.202 |
| chx04550 | Signaling pathways regulating pluripotency of | WNT10B 1 | 1 | 0.202 |
| chx05418 | Fluid shear stress and atherosclerosis        | GSTA2 1  | 1 | 0.202 |
| chx05224 | Breast cancer                                 | WNT10B 1 | 1 | 0.202 |

|          |                                                   |          |   |       |
|----------|---------------------------------------------------|----------|---|-------|
| chx04934 | Cushing syndrome                                  | WNT10B 1 | 1 | 0.202 |
| chx04390 | Hippo signaling pathway                           | WNT10B 1 | 1 | 0.202 |
| chx04150 | mTOR signaling pathway                            | WNT10B 1 | 1 | 0.202 |
| chx04310 | Wnt signaling pathway                             | WNT10B 1 | 1 | 0.209 |
| chx05164 | Influenza A                                       | NXT2 1   | 1 | 0.209 |
| chx04510 | Focal adhesion                                    | COL1A1 1 | 1 | 0.236 |
| chx05207 | Chemical carcinogenesis - receptor activation     | GSTA2 1  | 1 | 0.246 |
| chx05208 | Chemical carcinogenesis - reactive oxygen species | GSTA2 1  | 1 | 0.257 |
| chx05132 | Salmonella infection                              | GAPDH 1  | 1 | 0.273 |
| chx04151 | PI3K-Akt signaling pathway                        | COL1A1 1 | 1 | 0.354 |
| chx05014 | Amyotrophic lateral sclerosis                     | NXT2 1   | 1 | 0.354 |
| chx05022 | Pathways of neurodegeneration - multiple diseases | WNT10B 1 | 1 | 0.422 |

**Table S5.** Confirmation of DAPs detected using parallel reaction monitoring and TMT analysis

| Protein name | Description                          | Gene                | TMT<br>results | PRM<br>results |
|--------------|--------------------------------------|---------------------|----------------|----------------|
| A0A452G0A7   | Amine oxidase (EC 1.4.3.-)           | SERPINA7            | 1.20           | 3.52           |
| A0A452DYV8   | Alpha-2-glycoprotein 1, zinc-binding | -                   | 1.36           | 2.82           |
| A0A452EH87   | Ig-like domain-containing protein    | C5                  | 1.59           | 3.41           |
| A0A452ETX9   | Alpha-2-macroglobulin                | -                   | 1.34           | 3.46           |
| A0A452F7S5   | Beta-2-microglobulin                 | VNN1                | 1.26           | 1.29           |
| A0A452FEE2   | Ig-like domain-containing protein    | LOC102168547<br>B2M | 1.60           | 5.42           |
| A0A452G6C7   | Ig-like domain-containing protein    | LOC102176354        | 1.41           | 2.56           |
