# Supplementary material for: Cadmium Exposure Affects Serum Metabolites and Proteins in the Male Guizhou Black Goat
Source: Animals (Basel). 2023 Aug 25;13(17):2705. doi: 10.3390/ani13172705 (PMC10487163; doi:10.3390/ani13172705)
Supplement: Supplementary file 1 [file animals-13-02705-s001.zip › Supplementary file S1.pdf]

### **Serum preparation for metabolomics**

The serum samples were ground into powder with liquid nitrogen, and added into 400  $\mu$ L precooled formic acid and acetonitrile in aqueous solution at 4 °C (methanol: acetonitrile: water = 4:4:2, v/v), vortex-mixed for 1 min. The mixture was incubated for 60 min at -20 °C and centrifuged at 14,000g for 20 min at 4 °C to precipitate the proteins. Next, the supernatant was filtered through a 0.22  $\mu$ m nylon filter, and an aliquot of 2 $\mu$ L was injected for HILIC UHPLC-Q-EXACTIVE/MS analysis.

### **Metabolomics data acquisition**

The optimal linear gradient program was shown as followed: 0–0.5min, 5% B; 0.5–1.0 min, 5% B; 1.0–9.0 min, 5–100% B; 9.0–12.0 min, 100% B; 12.0–15.0 min, 5% B. Post time was set to 3 min for equilibration.

The scan time was set at 5 spectra/s and the data was collected in centroid mode from 50 to 1000 m/z. The optimal conditions of analysis were as followed: desolvation gas rate was set to 10 L/min at 320 °C and the nebulizer pressure was set at 60 psig; the fragment voltage was 60 V in both modes, capillary voltages were 3.5 KV in positive and negative modes.

### **NanoLC-PRM analyses**

NanoLC-PRM analyses were performed on a NanoAcquity UPLC device (Waters, Milford, Massachusetts, USA) coupled to a Q-Exactive HF (Thermo Fisher Scientific, USA). Solvent system consisted of 0.1% formic acid (FA) in H<sub>2</sub>O (solvent A) and 0.1% FA in ACN (solvent B) (Optima LC/MS grade solvents, Fisher Chemical, Illkirch, France). Peptides (100  $\mu$ g) were separated onto a Home-made C18 column (20 mm  $\times$

100  $\mu\text{m}$ , 5  $\mu\text{m}$  diameter particles) over 3 min at 250  $\mu\text{L}/\text{min}$  with 1% solvent B. Peptides were eluted on a EASY C18 column (120 mm  $\times$  75  $\mu\text{m}$ , 1.90  $\mu\text{m}$  particles; Thermo scientific, USA) at 0.25  $\mu\text{L}/\text{min}$  with the following gradient of solvent B: from 5% to 23% in 0-42 min, linear from 23% to 40% in 42-50 min, the linear gradient of liquid B in 52-60 min rises to 100% and maintains. A scheduled PRM method consisting of one full MS1 scan and 20 targeted MS2 scans was developed. The full MS1 scan was collected from 300 to 1800 m/z at a resolution of 60,000 at 200 m/z (AGC target: 3e6, maximum IT: 200 ms). Targeted MS2 scans were collected at a resolution of 30,000 at 200 m/z (AGC target: 1e6, maximum IT: 120 ms) and scheduled with 1.6Th isolation window. Precursors were isolated within a 2-m/z window and fragmented with a normalized collision energy (NCE) of 27.

### **Multivariate statistical analysis**

The obtained data sets were introduced into SIMCA-P 14.1 (Umetrics, Umea, Sweden) to perform unsupervised principal component analysis (PCA), supervised partial least squares discriminant analysis (PLS-DA), and supervised orthogonal partial least squares discriminant analysis (OPLS-DA). The fitness and predictive capability of the PCA, PLS-DA, and OPLS-DA models were evaluated by the cumulative  $R^2$  and  $Q^2$ . Variable importance for projection (VIP) value and loading-plots were constructed from the OPLS. Student's t-test with false discovery rate (FDR) was employed for univariate analysis across groups. The R language software was used for one-dimensional statistical analysis such as volcano map analysis, Student's t-test, and multiple of variation analysis to find the differential metabolites

related to Cd poisoning.

### **Quantitative proteomic analysis**

A linear gradient program was shown as followed: 0–35% buffer B for 50 min, 35–100% buffer B for 8 min, hold in 100% buffer B for 2 min. LC-MS/MS analysis was performed on a Q-EXACTIVE MS (Thermo Fisher Scientific). The mass spectrometer was operated in positive ion mode. MS data was acquired using a data-dependent top 10 method dynamically choosing the most abundant precursor ions from the survey scan (300–1800  $m/z$ ) for higher energy collisional dissociation (HCD) fragmentation. Automatic gain control (AGC) target was set to  $3e6$ , and maximum inject time to 10 ms. Dynamic exclusion duration was 40.0 s. Survey scans were acquired at a resolution of 70,000 at  $m/z$  200 and resolution for HCD spectra was set to 17,500 at  $m/z$  200, and isolation width was 2  $m/z$ . Normalized collision energy was 30 eV and the underfill ratio was defined as 0.1%.
