# Supplementary material for: Cadmium Exposure Affects Serum Metabolites and Proteins in the Male Guizhou Black Goat
Source: Animals (Basel). 2023 Aug 25;13(17):2705. doi: 10.3390/ani13172705 (PMC10487163; doi:10.3390/ani13172705)
Supplement: Supplementary file 1 [file animals-13-02705-s001.zip › Table S1 (POS+NEGú¬.xlsx]

## Sheet: CSM-CKS (POS)
id	Name	Formula	Annot..DeltaMass.[ppm]	Calc..MW	m/z	RT.[min]	Area.(Max.)	Reference.Ion	Area:.D11.raw.(F1)	Area:.D12.raw.(F2)	Area:.D13.raw.(F3)	Area:.D14.raw.(F4)	Area:.D15.raw.(F5)	Area:.D31.raw.(F11)	Area:.D32.raw.(F12)	Area:.D33.raw.(F13)	Area:.D34.raw.(F14)	Area:.D35.raw.(F15)	Area:.QC-1.raw.(F20)	Area:.QC-2.raw.(F21)	Area:.QC-3.raw.(F22)	HMDB ID	KEGG ID	mean(CSM)	mean(CKS)	Foldchange(CSM/CKS)	log2_FC	p_value	log10_pvalue	vip	pathway
									CKS11	CKS12	CKS13	CKS14	CKS15	CSM31	CSM32	CSM33	CSM34	CSM35	QC-1	QC-2	QC-3
									CKS	CKS	CKS	CKS	CKS	CSM	CSM	CSM	CSM	CSM	QC	QC	QC
P0045	Stearamide	C18 H37 N O	-0.71	283.28731	284.29459	0.104	2827956.48846535	[M+H]+1	2640602.69176562	2864171.5499786	2745107.25606474	2990383.26142119	2792605.53556051	2475930.51676386	2555189.89767473	2557341.75321615	2231563.90321735	2306403.78072951	2286001.76951493	2445890.48639722	2446101.37402825	HMDB0034146	C13846	2425285.97032032	2806574.05895813	0.864144654433471	-0.210655260779052	0.00261139230663371	2.58312787968688	1.25532543929755
P0178	Gabapentin	C9 H17 N O2	1	171.1261	172.13338	0.198	5218033.23143253	[M+H]+1	5222128.29038327	5068342.15364728	5262180.16905313	5032228.64434662	4819919.23156858	4461258.50283952	4513127.46614369	4482560.63985191	4779594.06998475	4685319.8735812	4597201.89791104	4597838.34939747	4522830.79446129	HMDB0005015	NULL	4584372.11048021	5080959.69779978	0.902265001721112	-0.148376869257261	0.00113934652566768	2.94334416767066	1.08006292786466
P0184	2-hydroxycaproic acid	C6 H12 O3	1.46	132.07884	133.08609	0.211	34727429.7410144	[M+H]+1	34349304.8998909	35292142.1177189	33375310.7699604	33242618.9149251	32557821.4683094	30766418.7760524	30721850.7047252	29979441.4648134	30106653.8512926	30676676.8979559	30519589.0390813	30518872.0956126	30274900.0956401	HMDB0001624	NULL	30450208.3389679	33763439.6341609	0.90186926062353	-0.149009786374386	0.000178819692147709	3.7475846571275	1.09204043208418
P0203	4-Aminophenol	C6 H7 N O	4.08	109.05321	110.06049	0.233	9277111.14461638	[M+H]+1	9160007.46174926	9229964.20173033	9154993.22501717	9220484.74872236	9275292.26343173	8337946.44069739	8373165.7175717	8413505.23949081	8278423.27563247	8256982.41033807	8579445.7655898	8499279.14530089	8496936.38594168	HMDB0001169	C02372	8332004.61674609	9208148.38013017	0.904851254865238	-0.144247442476554	1.04147051532567e-08	7.98235302068755	1.13252263870855
P0245	Diethylene glycol	C4 H10 O3	3.71	106.06339	107.0707	0.292	7576188.70508292	[M+H]+1	7439914.09724273	7501049.48731961	6877039.48947918	6863559.2280052	6926455.33611363	6335265.39361656	6748159.2992951	6236393.64108191	6195351.70166598	6181447.29679857	6357601.58252127	6500232.79473718	6358532.57699421	NULL	NULL	6339323.46649162	7121603.52763207	0.890153943826672	-0.167873236572749	0.00229741129858293	2.63876124741938	1.08286181472182
P0273	Triethylene glycol	C6 H14 O4	1.18	150.08939	151.09666	0.332	91300507.5236299	[M+H]+1	88876405.2405931	89041305.3592014	84792533.4115396	83082729.0205123	82361290.2164064	76520061.857578	76413890.0594962	74588602.5434576	75029466.4780068	75208509.880055	72994799.7741761	74482482.2401444	72992165.2696253	NA	NA	75552106.1637187	85630852.6496506	0.882300056882909	-0.180658716929001	0.000128403275378016	3.89142389791471	1.19844271242321
P0298	Suberic acid	C8 H14 O4	0.75	174.08934	175.09659	0.371	22885521.577014	[M+H]+1	22515151.6441215	22403462.5861723	21078730.6134253	20913716.7533226	21087739.4737566	19727659.9760487	19551549.4785628	19164378.239017	18144139.7729902	18437693.0049901	21135057.7715613	20266739.4128595	21137842.1066906	HMDB0000893	C08278	19005084.0943218	21599760.2141597	0.879874772029323	-0.184629887760466	0.00055157123360487	3.25839839190236	1.17375422707628
P0385	2-tert-Butyl-4-methoxyphenol	C11 H16 O2	0.81	180.11518	181.12245	0.463	6570832.51029609	[M+H]+1	6607884.5872336	6540331.71352483	6503939.7009208	6238371.04221267	6477450.63887396	6042534.88239531	5746404.7582686	5938020.45739494	5888512.53330666	5820081.30238678	5769010.78658604	5907867.27352878	5908677.67219468	HMDB0031848	C15469	5887110.78675046	6473595.53655317	0.909403553791533	-0.137007452991623	8.55115682748927e-05	4.06797512856888	1.05164067451924
P0417	PEG-4	C8 H18 O5	0.78	194.11557	195.12285	0.498	173234929.065483	[M+H]+1	174862520.559144	175667332.83771	168031299.765739	166409427.020728	165028164.308513	149475149.456038	150285609.705298	149546311.725533	149972853.722199	147725854.656073	151020938.601764	151016410.95262	148680360.209963	HMDB0094708	NULL	149401155.853028	169999748.898367	0.878831626641676	-0.186341305715507	1.63087088311217e-05	4.78758042091655	1.24243681974606
P0442	Diacetone acrylamide	C9 H15 N O2	0.7	169.1104	170.11764	0.53	4156716.37864737	[M+H]+1	4139604.67607411	4043245.76642107	4007430.83193113	4216832.23216232	4182907.03396886	3856158.96132029	3728598.48284566	3621250.83459046	3896528.20598149	3661674.55173856	3942802.99658584	3890975.56928176	3942790.53852928	NA	NA	3752842.20729529	4118004.1081115	0.911325513226924	-0.133961637525327	0.000608946619304437	3.21542077626304	1.02708486598517
P0673	Spermidine	C7 H19 N3	1.17	145.15807	146.16534	0.814	3508932.05302945	[M+H]+1	550525.202628013	1206546.7907406	1090031.01073884	719645.227454073	989725.347978768	307298.000876212	231630.113464331	510249.695366836	300435.57404006	800192.173820354	3352806.50730853	3321038.66771813	3321030.28743395	HMDB0001257	C00315	429961.111513559	911294.715908059	0.47181345837732	-1.08371152315761	0.0164681252248698	1.78335583925391	2.93644705043722	Arginine and proline metabolism [chx00330];beta-Alanine metabolism [chx00410];Glutathione metabolism [chx00480];ABC transporters [chx02010];Bile secretion [chx04976]
P1527	Flavone	C15 H10 O2	3.34	222.06882	261.03212	1.115	6793777.12152957	[M+K]+1	1337444.565715	1322436.70245501	1920668.93664361	2231916.8795352	1638544.30634381	1834776.74288427	3073462.03537294	3288574.16639948	2476939.98978511	2583190.37042639	2433053.15506757	1914803.19107961	2845739.62417742	HMDB0003075	C15608	2651388.66097364	1690202.27813853	1.56868127280819	0.649552252975244	0.0141729281328204	1.84854041506283	2.00374318042032
P2107	Octhilinone	C11 H19 N O S	2.7	213.11931	214.12659	4.146	390168.39962956	[M+H]+1	197279.676795633	208685.53770719	160786.509964481	313552.720944677	371364.515439146	146861.74324658	145205.371497526	124560.527295912	128288.429841927	71063.203311469	154297.624841544	160469.178288986	154269.425944973	NA	NA	123195.855038683	250333.792170225	0.492126348467211	-1.02289933439298	0.0160867753322066	1.7935310034947	2.58191035676157
P2862	D-Arabinonate	C5 H10 O6	3.39	166.0483	149.04503	4.899	1025570.68167735	[M+H-H2O]+1	310982.28989784	268466.100673838	270695.549698583	262997.541010046	482241.16227502	160558.341688501	146320.075324939	148001.40665758	247786.140544791	117481.232036263	832952.312289245	768878.771724783	770333.660784782	HMDB0000539	C00878	164029.439250415	319076.528711065	0.514075541416426	-0.959947721423199	0.0110714439744931	1.95579573329854	2.62516965285863	Ascorbate and aldarate metabolism [chx00053]
P3808	(3Z)-Phytochromobilin	C33 H36 N4 O6	-0.73	584.26306	585.27034	6.203	58805868.6166192	[M+H]+1	918936.75709398	8143644.64734156	6317204.61798233	2274785.58866615	4299522.29385011	881602.167676316	1090090.77395866	482391.877036191	1728194.88314837	1741965.94402154	5696648.84785732	5749878.08535961	5749913.04006614	METPA0710	C05913	1184849.12916822	4390818.78098683	0.269846966652066	-1.8897866248109	0.0428285939372127	1.36826618325772	3.29166759018519	Porphyrin metabolism [chx00860]
P3890	hexahydrophthalic anhydride	C8 H10 O3	0.46	154.06306	331.11526	6.315	5050435.30792645	[2M+Na]+1	119852.379670587	192055.198595555	150712.022134151	229921.376422667	211131.699352719	400508.030747517	328921.753749237	137493.31784643	280384.515573481	336042.01367363	361420.954021049	369384.475845566	358346.758855531	NA	NA	296669.926318059	180734.535235136	1.64146783530935	0.714986480465667	0.0438437136445753	1.35809266741053	1.82461289686641
P4322	DABCO	C6 H12 N2	4.49	112.10055	263.16431	6.789	2259166.40974144	[2M+K]+1	1879542.91725159	1768019.71605354	2242845.41235133	1617652.19983755	1021873.0144904	1173584.05740474	1513385.6969502	744274.214914551	817433.08951973	393686.555905505	1333244.7770312	1270312.65701822	1334471.69607878	NA	NA	928472.722938945	1705986.65199688	0.544243837929303	-0.877674926950984	0.0228835466188945	1.64047666529646	2.26513696328436
P4809	2,2'-(Tridecylimino)diethanol	C17 H37 N O2	-0.41	287.28231	288.28959	7.401	17139745.0105546	[M+H]+1	15679787.2728791	13726519.5585281	17072051.6895346	14649977.8661545	15282779.1907191	12392678.3870622	13180943.2452104	13989974.0220459	14248626.741224	14278263.8796041	14338525.8646351	14292199.66484	14292323.7787655	NA	NA	13618097.2550293	15282223.1155631	0.891107082526556	-0.166329286992649	0.0368131441032827	1.43399708914409	1.03124756908312
P6492	1,3-Benzothiazole	C7 H5 N S	0.12	135.01429	136.02156	10.042	55247388.7235063	[M+H]+1	44174568.8462136	49425250.7638385	48342480.7055125	43059213.9944995	43788277.8368973	47656122.7206272	49807158.8642835	52605526.3343323	52024619.3068262	52659512.3540145	50826527.7050504	51495354.8739265	51500218.747635	HMDB0032930	NULL	50950587.9160167	45757958.4293923	1.1134803576221	0.155076108452475	0.0126755302120948	1.89703386525925	1.01596541897096
P6972	Erucic amide	C22 H43 N O	-0.87	337.33417	338.34145	11.424	3252032.0336781	[M+H]+1	1095565.86461627	764179.621052328	708232.008704195	1138190.99458686	501495.9541166	1792443.79020413	662704.141318585	1933083.29452566	1639956.06790849	1739099.43636498	3142684.49487458	3085038.88744431	3141534.41173147	NA	NA	1553457.34606437	841532.888615251	1.84598530500762	0.884391068434927	0.0245892460602626	1.60925478711681	2.20495058217689

## Sheet: CSM-CKS(NEG)
id	Name	Formula	Annot..DeltaMass.[ppm]	Calc..MW	m/z	RT.[min]	Area.(Max.)	Reference.Ion	Area:.D11.raw.(F1)	Area:.D12.raw.(F2)	Area:.D13.raw.(F3)	Area:.D14.raw.(F4)	Area:.D15.raw.(F5)	Area:.D31.raw.(F11)	Area:.D32.raw.(F12)	Area:.D33.raw.(F13)	Area:.D34.raw.(F14)	Area:.D35.raw.(F15)	Area:.QC-1.raw.(F20)	Area:.QC-2.raw.(F21)	Area:.QC-3.raw.(F22)	HMDB ID	KEGG ID	mean(CSM)	mean(CKS)	Foldchange(CSM/CKS)	log2_FC	p_value	log10_pvalue	vip	pathway
									CKS11	CKS12	CKS13	CKS14	CKS15	CSM31	CSM32	CSM33	CSM34	CSM35	QC-1	QC-2	QC-3
									CKS	CKS	CKS	CKS	CKS	CSM	CSM	CSM	CSM	CSM	QC	QC	QC
N0003	p-cresolsulfatepotassium;p-Cresolsulfate	C7 H8 O4 S	-3.13	188.01374	187.00646	0.069	9634221.77653879	[M-H]-1	6220355.15346284	7770385.97864509	5022339.24670179	4752406.08624972	5466434.9161935	8455433.72758022	9918714.94145496	6874500.85403357	9526101.81678265	6700819.19610715	6930825.7088048	6928416.77878444	6455958.33890636			8295114.10719171	5846384.27625059	1.41884517254339	0.504717167981516	0.0209530360158576	1.67875304050653	1.80808255459733
N0278	Pterin	C6 H5 N5 O	-3.83	163.04879	162.04151	0.453	136629.305979028	[M-H]-1	74032.7856928814	48332.0485111821	130034.189642645	103866.995988028	36821.8730155734	28734.828014563	24831.4530201293	25062.9295957744	24565.9251359033	44409.4452868942	39129.7188389882	34676.1776302468	34441.9414797507	HMDB0000802	C00715	29520.9162106528	78617.578570062	0.375500196617536	-1.41311443173085	0.0240648157712562	1.61861745872517	2.92876213555743
N0279	3-Hydroxybutyric acid	C4 H8 O3	-9.95	104.04631	103.03903	0.454	28607851.8524241	[M-H]-1	11045615.0520522	8995580.76293926	9274169.19362779	8812932.95163703	9140467.95942989	14768276.3697319	12150278.3401078	11691946.8732481	11171082.0885364	10597006.6417527	13655674.2796935	14894182.8081174	13610861.1074592	HMDB0000357	C01089	12075718.0626754	9453753.18393723	1.27734644936501	0.353149874290859	0.0132180640341228	1.87883214854678	1.46657902259762	Butanoate metabolism [chx00650];cAMP signaling pathway [chx04024]
N3059	Davidioside	C21 H24 O9	2.13	420.14293	419.13565	4.86	694343.645905299	[M-H]-1	318426.774139085	140874.771079236	365283.849855051	403463.210105058	512555.990329707	142098.364678447	190279.661006441	233245.214968727	108783.304463208	154600.677534279	299563.700979062	299549.696319885	308889.849967461	NULL	NULL	165801.44453022	348120.919101627	0.476275441757689	-1.07013193410863	0.0223285982779239	1.65113853977095	2.39786334375319
N3509	Elymoclavine	C16 H18 N2 O	0.99	254.14216	253.13489	5.676	1552176.71580161	[M-H]-1	48846.281034524	154440.689435332	167261.883248082	53933.3251384355	138662.492218044	45207.5764689305	46176.9115185521	47673.6191230056	62876.3762659631	45279.4797430058	144623.093480906	144569.418105457	130978.582254648	NA	NA	49442.7926238914	112628.934214883	0.438988373356708	-1.18774536451794	0.0390836616173872	1.40800475545141	2.35698588845211
N3902	Nifenazone	C17 H16 N4 O2	-2.55	308.12654	307.11926	6.311	1676681.03162181	[M-H]-1	29993.5982010621	31742.3384127731	59994.2401401952	55712.6911710799	33335.7047151516	93093.6434234781	111022.918345093	56274.6589282361	56125.1517671423	65061.4704174665	96942.8087457988	112636.959443392	97247.2432764644	NA	NA	76315.5685762832	42155.7145280524	1.81032558528926	0.856249187938478	0.02808467958842	1.55153052652435	2.18352860722935
N4655	Methyl(2E_6E)-(10R_11S)-10_11-epoxy-3_7_11-trimethyltrideca-2_6-dienoate	C17 H28 O3	1.46	280.20425	279.19698	7.775	1883187.66039812	[M-H]-1	592596.358695953	501802.827395369	1880622.11011747	1164942.12273511	1029806.4332164	426314.757029702	497233.61777116	494443.299005018	471243.765444036	160937.941209498	690911.933686386	677615.924000046	677621.109565767	NA	NA	410034.676091883	1033953.97043206	0.396569564813935	-1.3343541343576	0.0396868286632761	1.40135360376523	2.70406890216162
N5147	Decylubiquinol	C19 H32 O4	1.11	324.23042	323.22314	8.465	469945.808908602	[M-H]-1	120872.164851516	144378.321086634	164769.706446902	208776.150223893	170754.001452974	84578.1024824524	86392.2690460396	99026.760910728	142581.032512309	89427.7633258962	148301.429413181	190541.703499144	190935.830107987	NA	NA	100401.185655485	161910.068812384	0.620104644460541	-0.689416399863259	0.00963834171312203	2.0159976804946	2.1145304812876
N6835	[6]-Gingerol	C17 H26 O4	0.66	294.1833	293.17603	11.186	1697452.39160098	[M-H]-1	963067.185757639	1106707.89680141	580858.924702639	409859.29791045	611839.150028168	1135106.11694552	1237915.49390379	1078330.78010661	1189812.54885642	1108601.25237989	700278.407081912	565790.321567817	561512.837613482	HMDB0005783	C10462	1149953.23843845	734466.491040061	1.56569871119651	0.646806620239584	0.0139021603208487	1.85691770747805	2.13708489167888
N7031	Eicosanoic acid	C20 H40 O2	1.45	312.30328	311.29601	11.935	882973.970737547	[M-H]-1	461819.438216663	349869.852360794	471528.280940621	254495.491739157	359495.692155954	567496.927820591	493513.092562131	618994.943249572	574323.717819081	470056.422051321	457724.43517637	455592.041740497	490708.357033941	HMDB0002212	C06425	544877.020700539	379441.751082638	1.4359964846933	0.522052217460584	0.00931461582705452	2.03083505248335	1.80727495739702	Biosynthesis of unsaturated fatty acids [chx01040]
