# Supplementary material for: Cadmium Exposure Affects Serum Metabolites and Proteins in the Male Guizhou Black Goat
Source: Animals (Basel). 2023 Aug 25;13(17):2705. doi: 10.3390/ani13172705 (PMC10487163; doi:10.3390/ani13172705)
Supplement: Supplementary file 1 [file animals-13-02705-s001.zip › Table S2 (CSM-CKS_kegg_enrich).xlsx]

## Sheet: Sheet 1
ID	Description	hit	total	richfactor	BgRatio	pvalue	p.adjust	qvalue	kEGG ID	url	up count	down count	up gene	down gene	Z_SCORE	type
chx04024	cAMP signaling pathway	1	5	0.04	25/3513	0.035099	0.144334	0.121544	C01089	http://www.kegg.jp/kegg-bin/show_pathway?chx04024/C01089%09pink	1	0	0.353149874290859		1	up
chx00410	beta-Alanine metabolism	1	5	0.03125	32/3513	0.0447479	0.144334	0.121544	C00315	http://www.kegg.jp/kegg-bin/show_pathway?chx00410/C00315%09pink	0	1		C00315	-1	down
chx00480	Glutathione metabolism	1	5	0.0263158	38/3513	0.0529569	0.144334	0.121544	C00315	http://www.kegg.jp/kegg-bin/show_pathway?chx00480/C00315%09pink	0	1		C00315	-1	down
chx00650	Butanoate metabolism	1	5	0.0212766	47/3513	0.0651644	0.144334	0.121544	C01089	http://www.kegg.jp/kegg-bin/show_pathway?chx00650/C01089%09pink	1	0	0.353149874290859		1	up
chx00053	Ascorbate and aldarate metabolism	1	5	0.0175439	57/3513	0.0785803	0.144334	0.121544	C00878	http://www.kegg.jp/kegg-bin/show_pathway?chx00053/C00878%09pink	0	1		C00878	-1	down
chx00330	Arginine and proline metabolism	1	5	0.0144928	69/3513	0.0944756	0.144334	0.121544	C00315	http://www.kegg.jp/kegg-bin/show_pathway?chx00330/C00315%09pink	0	1		C00315	-1	down
chx01040	Biosynthesis of unsaturated fatty acids	1	5	0.0135135	74/3513	0.101034	0.144334	0.121544	C06425	http://www.kegg.jp/kegg-bin/show_pathway?chx01040/C06425%09pink	1	0	0.522052217460584		1	up
chx02010	ABC transporters	1	5	0.00719424	139/3513	0.182884	0.215256	0.181268	C00315	http://www.kegg.jp/kegg-bin/show_pathway?chx02010/C00315%09pink	0	1		C00315	-1	down
chx00860	Porphyrin metabolism	1	5	0.00675676	148/3513	0.193731	0.215256	0.181268	C05913	http://www.kegg.jp/kegg-bin/show_pathway?chx00860/C05913%09pink	0	1		C05913	-1	down
chx04976	Bile secretion	1	5	0.00574713	174/3513	0.22442	0.22442	0.188985	C00315	http://www.kegg.jp/kegg-bin/show_pathway?chx04976/C00315%09pink	0	1		C00315	-1	down
