# Supplementary material for: Cadmium Exposure Affects Serum Metabolites and Proteins in the Male Guizhou Black Goat
Source: Animals (Basel). 2023 Aug 25;13(17):2705. doi: 10.3390/ani13172705 (PMC10487163; doi:10.3390/ani13172705)
Supplement: Supplementary file 1 [file animals-13-02705-s001.zip › Table S3 (PRO).xlsx]

## Sheet: Sheet1
Accession	Description	Score	Coverage	# Proteins	# Unique Peptides	# Peptides	# PSMs	126/(126+127_N+127_C+128_N+128_C+129_N+129_C+130_N+130_C+131_N+131_C+132_N+132_C+133_N+133_C)	126/(126+127_N+127_C+128_N+128_C+129_N+129_C+130_N+130_C+131_N+131_C+132_N+132_C+133_N+133_C) Count	126/(126+127_N+127_C+128_N+128_C+129_N+129_C+130_N+130_C+131_N+131_C+132_N+132_C+133_N+133_C) Variability [%]	127_C/(126+127_N+127_C+128_N+128_C+129_N+129_C+130_N+130_C+131_N+131_C+132_N+132_C+133_N+133_C)	127_C/(126+127_N+127_C+128_N+128_C+129_N+129_C+130_N+130_C+131_N+131_C+132_N+132_C+133_N+133_C) Count	127_C/(126+127_N+127_C+128_N+128_C+129_N+129_C+130_N+130_C+131_N+131_C+132_N+132_C+133_N+133_C) Variability [%]	127_N/(126+127_N+127_C+128_N+128_C+129_N+129_C+130_N+130_C+131_N+131_C+132_N+132_C+133_N+133_C)	127_N/(126+127_N+127_C+128_N+128_C+129_N+129_C+130_N+130_C+131_N+131_C+132_N+132_C+133_N+133_C) Count	127_N/(126+127_N+127_C+128_N+128_C+129_N+129_C+130_N+130_C+131_N+131_C+132_N+132_C+133_N+133_C) Variability [%]	128_C/(126+127_N+127_C+128_N+128_C+129_N+129_C+130_N+130_C+131_N+131_C+132_N+132_C+133_N+133_C)	128_C/(126+127_N+127_C+128_N+128_C+129_N+129_C+130_N+130_C+131_N+131_C+132_N+132_C+133_N+133_C) Count	128_C/(126+127_N+127_C+128_N+128_C+129_N+129_C+130_N+130_C+131_N+131_C+132_N+132_C+133_N+133_C) Variability [%]	128_N/(126+127_N+127_C+128_N+128_C+129_N+129_C+130_N+130_C+131_N+131_C+132_N+132_C+133_N+133_C)	128_N/(126+127_N+127_C+128_N+128_C+129_N+129_C+130_N+130_C+131_N+131_C+132_N+132_C+133_N+133_C) Count	128_N/(126+127_N+127_C+128_N+128_C+129_N+129_C+130_N+130_C+131_N+131_C+132_N+132_C+133_N+133_C) Variability [%]	129_C/(126+127_N+127_C+128_N+128_C+129_N+129_C+130_N+130_C+131_N+131_C+132_N+132_C+133_N+133_C)	129_C/(126+127_N+127_C+128_N+128_C+129_N+129_C+130_N+130_C+131_N+131_C+132_N+132_C+133_N+133_C) Count	129_C/(126+127_N+127_C+128_N+128_C+129_N+129_C+130_N+130_C+131_N+131_C+132_N+132_C+133_N+133_C) Variability [%]	129_N/(126+127_N+127_C+128_N+128_C+129_N+129_C+130_N+130_C+131_N+131_C+132_N+132_C+133_N+133_C)	129_N/(126+127_N+127_C+128_N+128_C+129_N+129_C+130_N+130_C+131_N+131_C+132_N+132_C+133_N+133_C) Count	129_N/(126+127_N+127_C+128_N+128_C+129_N+129_C+130_N+130_C+131_N+131_C+132_N+132_C+133_N+133_C) Variability [%]	130_C/(126+127_N+127_C+128_N+128_C+129_N+129_C+130_N+130_C+131_N+131_C+132_N+132_C+133_N+133_C)	130_C/(126+127_N+127_C+128_N+128_C+129_N+129_C+130_N+130_C+131_N+131_C+132_N+132_C+133_N+133_C) Count	130_C/(126+127_N+127_C+128_N+128_C+129_N+129_C+130_N+130_C+131_N+131_C+132_N+132_C+133_N+133_C) Variability [%]	130_N/(126+127_N+127_C+128_N+128_C+129_N+129_C+130_N+130_C+131_N+131_C+132_N+132_C+133_N+133_C)	130_N/(126+127_N+127_C+128_N+128_C+129_N+129_C+130_N+130_C+131_N+131_C+132_N+132_C+133_N+133_C) Count	130_N/(126+127_N+127_C+128_N+128_C+129_N+129_C+130_N+130_C+131_N+131_C+132_N+132_C+133_N+133_C) Variability [%]	131_C/(126+127_N+127_C+128_N+128_C+129_N+129_C+130_N+130_C+131_N+131_C+132_N+132_C+133_N+133_C)	131_C/(126+127_N+127_C+128_N+128_C+129_N+129_C+130_N+130_C+131_N+131_C+132_N+132_C+133_N+133_C) Count	131_C/(126+127_N+127_C+128_N+128_C+129_N+129_C+130_N+130_C+131_N+131_C+132_N+132_C+133_N+133_C) Variability [%]	131_N/(126+127_N+127_C+128_N+128_C+129_N+129_C+130_N+130_C+131_N+131_C+132_N+132_C+133_N+133_C)	131_N/(126+127_N+127_C+128_N+128_C+129_N+129_C+130_N+130_C+131_N+131_C+132_N+132_C+133_N+133_C) Count	131_N/(126+127_N+127_C+128_N+128_C+129_N+129_C+130_N+130_C+131_N+131_C+132_N+132_C+133_N+133_C) Variability [%]	132_C/(126+127_N+127_C+128_N+128_C+129_N+129_C+130_N+130_C+131_N+131_C+132_N+132_C+133_N+133_C)	132_C/(126+127_N+127_C+128_N+128_C+129_N+129_C+130_N+130_C+131_N+131_C+132_N+132_C+133_N+133_C) Count	132_C/(126+127_N+127_C+128_N+128_C+129_N+129_C+130_N+130_C+131_N+131_C+132_N+132_C+133_N+133_C) Variability [%]	132_N/(126+127_N+127_C+128_N+128_C+129_N+129_C+130_N+130_C+131_N+131_C+132_N+132_C+133_N+133_C)	132_N/(126+127_N+127_C+128_N+128_C+129_N+129_C+130_N+130_C+131_N+131_C+132_N+132_C+133_N+133_C) Count	132_N/(126+127_N+127_C+128_N+128_C+129_N+129_C+130_N+130_C+131_N+131_C+132_N+132_C+133_N+133_C) Variability [%]	133_C/(126+127_N+127_C+128_N+128_C+129_N+129_C+130_N+130_C+131_N+131_C+132_N+132_C+133_N+133_C)	133_C/(126+127_N+127_C+128_N+128_C+129_N+129_C+130_N+130_C+131_N+131_C+132_N+132_C+133_N+133_C) Count	133_C/(126+127_N+127_C+128_N+128_C+129_N+129_C+130_N+130_C+131_N+131_C+132_N+132_C+133_N+133_C) Variability [%]
B3VHM9	Albumin (Fragment) OS=Capra hircus OX=9925 PE=1 SV=1 - [B3VHM9_CAPHI]	50209.8	82.16	24	71	81	4787	0.971527	4013	9.36787	0.957221	4010	8.73687	0.959677	4008	9.4856	0.961825	4014	9.17282	0.961399	4015	8.1448	1.04948	4015	7.1718	1.06328	4014	7.32071	1.04983	4015	7.40432	1.0765	4015	8.03546	0.985029	4014	7.98778	1.05178	4014	7.41094	0.981591	4011	8.28613	0.996338	4012	8.33308	0.992389	4011	8.11684
A0A452F0Q6	Ig-like domain-containing protein OS=Capra hircus OX=9925 PE=4 SV=1 - [A0A452F0Q6_CAPHI]	11798.8	42.17	2	6	12	716	0.978235	267	13.4489	0.978642	269	14.3395	0.951453	269	13.6444	0.989555	268	14.0566	0.963577	269	12.2794	0.997417	269	11.0699	1.02618	269	8.82067	1.01159	268	10.219	1.0143	269	9.86917	1.00844	267	9.07656	1.00446	269	10.2822	1.02137	268	9.5519	1.03629	268	9.56513	1.04371	268	10.2697
P85295	Albumin (Fragment) OS=Capra hircus OX=9925 GN=ALB PE=1 SV=2 - [ALBU_CAPHI]	10654.4	88.89	1	2	12	776	1.01928	4	3.44422	0.967407	4	4.11824	0.947543	4	4.26337	0.939155	4	2.10473	0.941016	4	1.80167	1.08324	4	3.70609	1.08288	4	2.06254	1.06059	4	3.81836	1.0629	4	7.5053	0.976877	4	2.59755	1.0252	4	7.43915	0.946419	4	5.38083	1.03341	4	2.91597	0.990714	4	9.38252
A0A452FJF9	Serotransferrin OS=Capra hircus OX=9925 GN=TF PE=3 SV=1 - [A0A452FJF9_CAPHI]	10138.3	73.21	15	7	58	1068	1.01867	154	9.08888	0.995675	154	8.63549	1.03462	154	9.65651	1.00277	154	9.7486	1.0225	154	7.44641	0.934096	154	10.4295	0.942307	154	10.1669	0.931949	154	10.6557	0.942024	154	11.5388	1.02094	154	9.96161	0.929979	154	11.2295	1.06554	154	11.2416	1.02352	154	8.58345	1.07401	154	11.0754
A0A8C2P2V7	Serotransferrin OS=Capra hircus OX=9925 PE=3 SV=1 - [A0A8C2P2V7_CAPHI]	9989.81	74.13	15	5	59	995	1.0598	69	9.9185	1.04858	69	10.3834	1.02915	69	8.53706	1.04875	69	9.50361	1.02855	69	9.99266	0.937086	69	11.9191	0.950274	69	8.37176	0.920294	69	11.1523	0.931186	69	8.84297	1.02944	69	9.76147	0.923023	69	8.72572	1.02102	69	9.95643	1.00197	69	10.5161	1.02697	69	12.557
A0A452DXE2	Complement C3 OS=Capra hircus OX=9925 GN=C3 PE=4 SV=1 - [A0A452DXE2_CAPHI]	8875.43	55.87	2	14	85	813	0.975251	56	15.0984	0.998838	56	21.2487	1.00036	56	17.4039	0.979727	56	16.7203	0.973343	56	18.9906	0.92211	56	16.2294	0.920224	56	18.5289	0.966159	56	15.4504	0.920315	56	19.4961	1.1022	56	12.2975	0.950193	56	17.0811	1.11037	56	20.569	1.07603	56	15.186	1.09543	56	19.1791
A0A8C2NUV4	Complement C3 OS=Capra hircus OX=9925 PE=4 SV=1 - [A0A8C2NUV4_CAPHI]	8444.27	56.58	10	1	83	827
A0A8C2NTT9	Complement C3 OS=Capra hircus OX=9925 PE=4 SV=1 - [A0A8C2NTT9_CAPHI]	8435.95	56.26	1	1	80	817	1.0944	4	1.84766	1.0014	4	2.35317	0.970333	4	2.97137	1.12757	4	1.29971	0.940141	4	5.31292	0.935133	4	2.59251	0.931028	4	3.29255	0.900406	4	0.804461	0.899156	4	3.36774	1.04226	4	5.80943	0.907382	4	4.59955	1.11684	4	0.500346	1.0543	4	4.45094	1.11194	4	3.35559
A0A452EU19	Alpha-2-macroglobulin OS=Capra hircus OX=9925 GN=LOC102175560 PE=3 SV=1 - [A0A452EU19_CAPHI]	8280.08	53.49	25	57	69	706	0.985405	531	11.4391	0.968723	530	9.92533	0.973695	531	11.5619	0.954893	531	11.8598	0.979458	531	9.88455	0.981395	531	10.769	0.987781	531	11.191	0.979436	531	10.8602	1.00639	531	10.5582	1.02175	531	10.3777	0.971078	531	10.5466	1.05635	529	11.3054	1.0258	528	10.1981	1.06072	529	11.3817
A0A452F074	Ig-like domain-containing protein OS=Capra hircus OX=9925 PE=4 SV=1 - [A0A452F074_CAPHI]	7897.63	33.17	1	6	12	498	1.01905	51	11.0434	0.985501	51	10.1077	0.977442	51	9.29058	0.996111	51	8.23804	0.99294	51	8.52541	1.0329	51	10.7219	1.04168	51	13.0092	1.04367	51	9.54843	1.0464	51	11.9851	0.967399	51	12.7514	1.04807	51	12.1116	0.960246	51	16.0046	0.992118	51	13.4776	0.977509	51	15.836
A0A452DZD6	Ig-like domain-containing protein OS=Capra hircus OX=9925 PE=4 SV=1 - [A0A452DZD6_CAPHI]	7248.28	72.64	5	9	9	433	0.955414	432	10.6035	0.943632	433	9.51481	0.947474	433	10.3831	0.926215	433	10.0285	0.94837	433	9.04966	1.0319	433	8.22068	1.03703	433	9.05235	1.03717	433	8.1621	1.06115	433	8.75744	0.99952	432	9.16426	1.03039	433	8.50411	1.02925	433	8.66943	1.01447	433	8.88033	1.04679	433	8.3268
A0A452G137	Vitamin D-binding protein OS=Capra hircus OX=9925 GN=GC PE=4 SV=1 - [A0A452G137_CAPHI]	4510.17	60.9	3	29	29	310	1.05592	309	11.0431	1.04509	310	10.1554	1.05077	310	10.3043	1.04536	310	10.086	1.04964	310	9.41174	0.960088	310	8.9437	0.944928	309	10.6279	0.936513	310	9.84112	0.951296	309	10.2922	0.99071	310	8.85287	0.936208	310	11.7764	1.02174	310	9.99857	1.00948	310	8.18133	1.03732	309	9.54677
A0A452EK22	Ceruloplasmin OS=Capra hircus OX=9925 GN=CP PE=3 SV=1 - [A0A452EK22_CAPHI]	4205.15	46.77	3	7	45	253	1.01413	34	4.54261	0.982885	34	6.29442	0.980301	34	6.18023	0.9785	34	4.47408	1.00187	34	6.88673	0.990556	34	5.9939	0.96085	34	7.66516	0.970874	34	6.32839	0.993312	34	8.63925	0.984593	34	5.8194	0.975476	34	6.11952	1.04129	34	5.33074	1.01575	34	11.0344	1.06199	34	5.73048
A0A8C2NGQ8	Ceruloplasmin OS=Capra hircus OX=9925 PE=3 SV=1 - [A0A8C2NGQ8_CAPHI]	3916.6	48.2	6	1	39	223	1.26892	4	5.58999	1.23733	4	9.88603	1.11083	4	5.72447	1.18721	4	18.116	1.21184	4	7.83586	1.05293	4	6.80589	0.856646	4	11.5212	0.976973	4	5.79905	0.914882	4	12.4661	0.767574	4	0.810827	0.985039	4	7.18214	0.914425	4	3.24865	0.890972	4	7.3101	0.895761	4	4.27722
A0A452F854	Serpin domain-containing protein OS=Capra hircus OX=9925 GN=LOC102175387 PE=3 SV=1 - [A0A452F854_CAPHI]	3887.98	44.82	1	6	16	355	0.980806	110	13.5202	0.965113	110	11.5713	0.984452	110	12.4187	0.983924	110	10.9982	0.982637	110	10.9931	1.04515	110	10.1386	1.06156	110	10.4548	1.07179	110	9.93219	1.07665	110	13.7885	0.983218	110	14.2282	1.05676	110	10.9466	0.972396	110	10.0344	0.985397	110	13.2095	1.01833	110	13.8996
A0A8C2RDF4	Hemopexin OS=Capra hircus OX=9925 PE=4 SV=1 - [A0A8C2RDF4_CAPHI]	3641.05	47.87	1	2	22	252	1.10202	37	14.5558	1.07347	37	14.1906	1.10616	37	16.7088	1.0597	37	13.9353	1.03054	37	8.1152	0.845338	37	15.8608	0.880177	37	17.95	0.839762	37	16.6275	0.832126	37	16.871	1.08995	37	17.567	0.846289	37	19.2999	0.998188	37	16.084	1.05752	37	21.07	1.02708	37	23.954
A0A8C2P997	Ig-like domain-containing protein OS=Capra hircus OX=9925 PE=4 SV=1 - [A0A8C2P997_CAPHI]	3509.39	63.25	3	7	17	225	0.950949	72	15.2859	0.930507	72	14.5821	0.963791	72	19.5301	0.931847	72	13.1715	0.943926	72	13.5725	1.15632	72	16.3344	1.17231	72	14.6466	1.2156	72	15.6299	1.16054	72	15.7195	0.907869	72	12.2742	1.14819	72	16.2629	0.876276	72	13.485	0.881308	72	14.9928	0.862107	72	15.8371
A0A452EKB3	Ig-like domain-containing protein OS=Capra hircus OX=9925 PE=4 SV=1 - [A0A452EKB3_CAPHI]	3505.35	38.96	5	3	9	185	1.01344	24	18.3642	1.02328	24	13.9948	1.01379	24	7.29527	0.996283	24	12.2969	1.01572	24	13.8298	1.07399	24	8.09148	1.02927	24	10.8573	1.05498	24	9.85126	1.03058	24	16.1257	0.923543	24	16.8963	1.01955	24	10.0066	1.06205	24	18.3679	0.946883	24	21.0905	0.930766	24	17.4065
A0A452DRK5	Hemopexin OS=Capra hircus OX=9925 GN=HPX PE=3 SV=1 - [A0A452DRK5_CAPHI]	3470.68	53.81	1	3	23	255	0.939226	40	25.0533	0.97012	40	19.7136	0.991693	40	16.5625	0.941239	40	22.4753	0.950093	40	17.078	0.98014	40	10.026	0.964968	40	10.4565	0.990021	40	11.667	0.986534	40	13.5501	1.01893	40	23.1304	0.960933	40	9.05096	1.04917	40	20.1294	1.01419	40	20.766	0.986655	40	21.8579
A0A452EKT9	Ig-like domain-containing protein OS=Capra hircus OX=9925 PE=4 SV=1 - [A0A452EKT9_CAPHI]	3440.33	27.05	1	1	7	173	1.02601	12	4.58282	0.972687	12	10.2438	0.956758	12	9.77761	1.01548	12	9.18883	0.969975	12	6.59754	1.06126	12	4.8032	1.00855	12	15.5538	1.05619	12	6.93714	1.05313	12	7.22511	0.990209	12	7.70583	1.06046	12	6.85111	0.950784	12	7.29707	0.999885	12	14.2436	0.942695	12	7.32633
A0A452FI14	Apolipoprotein A-I OS=Capra hircus OX=9925 GN=APOA1 PE=3 SV=1 - [A0A452FI14_CAPHI]	3227.06	77.36	5	24	24	371	1.00513	371	11.5889	0.979803	370	10.3729	0.990993	370	9.56435	0.984792	371	10.7412	0.989203	371	8.01867	0.975067	371	7.76956	0.98543	371	7.89575	0.978465	371	7.52289	1.00554	371	9.35755	1.01636	371	8.25958	0.966409	371	7.89563	1.03332	371	11.2676	1.02765	369	9.3529	1.04685	370	8.89855
A0A452EPC6	Ig-like domain-containing protein OS=Capra hircus OX=9925 PE=4 SV=1 - [A0A452EPC6_CAPHI]	3045.22	47.64	3	4	14	201	0.99721	48	9.68293	0.990739	48	10.8651	1.02035	48	8.68164	0.949907	48	14.6776	1.0298	48	13.2903	1.06489	48	13.2422	1.08157	48	9.60739	1.06598	48	13.0579	1.14099	48	13.4615	0.930755	48	15.7121	1.06776	48	8.79668	0.913453	48	12.5954	0.914917	48	13.4635	0.942258	47	7.9025
A0A452EWZ3	Serpin domain-containing protein OS=Capra hircus OX=9925 GN=LOC102174166 PE=3 SV=1 - [A0A452EWZ3_CAPHI]	2846.74	41.37	3	11	20	347	1.01888	103	10.7297	0.984042	104	13.8708	0.995416	104	12.657	0.988395	105	14.9023	1.01448	104	13.9447	0.98463	104	7.72977	0.997173	105	7.83809	0.999975	101	8.82034	1.00386	104	10.7858	0.996612	103	10.6245	0.983106	105	7.80183	1.0306	104	11.0727	1.01925	104	9.95115	1.04082	103	13.0724
A0A8C2PBW6	Alpha-1-B glycoprotein OS=Capra hircus OX=9925 PE=4 SV=1 - [A0A8C2PBW6_CAPHI]	2844.85	45.4	10	16	16	109	1.03603	109	13.0269	1.03415	109	10.9994	1.04266	109	15.6419	1.03263	109	13.1927	1.04261	109	11.1452	0.933074	109	15.5527	0.906442	109	14.7221	0.944047	109	15.2579	0.926548	108	13.0959	1.04243	109	10.2663	0.919749	108	13.7051	1.07437	105	9.96072	1.07142	106	9.34569	1.04666	109	11.1954
A0A452FH78	Alpha-2-HS-glycoprotein OS=Capra hircus OX=9925 GN=AHSG PE=4 SV=1 - [A0A452FH78_CAPHI]	2654.18	53.2	2	17	17	203	1.11554	200	14.2926	1.10234	203	13.1403	1.11603	203	13.4255	1.06289	202	11.3605	1.10351	203	11.0654	0.866725	203	16.0007	0.856806	201	15.0145	0.86014	203	16.6473	0.83346	202	15.4348	1.03168	203	10.4904	0.821817	203	15.0801	1.06588	203	10.5573	1.04123	203	10.2615	1.07624	202	12.0414
A0A452DZU0	Serpin domain-containing protein OS=Capra hircus OX=9925 GN=LOC102174926 PE=3 SV=1 - [A0A452DZU0_CAPHI]	2601.71	35.16	4	13	16	236	1.08358	224	10.5263	1.05412	224	8.30622	1.08941	224	9.70338	1.02924	224	9.50423	1.07353	224	9.42945	0.952497	224	9.32365	0.971299	224	9.41672	0.944836	224	8.60479	0.97715	224	8.29076	0.959565	224	9.82991	0.944797	224	8.64678	0.99917	224	8.67081	0.975684	224	9.03209	1.0053	224	9.90961
A0A452F378	Amine oxidase OS=Capra hircus OX=9925 GN=LOC102169793 PE=3 SV=1 - [A0A452F378_CAPHI]	2518.98	31.76	4	8	20	128	1.03732	47	6.81851	1.02252	47	7.46695	1.0294	47	9.56167	0.980496	47	8.67362	1.03359	47	7.32118	0.908627	47	9.08338	0.93644	47	10.4729	0.916546	47	9.86736	0.928987	47	8.76647	1.02015	47	9.14339	0.901124	47	12.5711	1.05696	47	9.45843	1.04463	47	5.43762	1.05617	47	10.259
A0A8C2SJM5	Inter-alpha-trypsin inhibitor heavy chain 1 OS=Capra hircus OX=9925 PE=3 SV=1 - [A0A8C2SJM5_CAPHI]	2483.12	30.77	2	19	19	131	1.02749	131	10.1703	1.00733	131	8.40494	1.02602	131	8.74522	1.01896	131	9.88419	1.00971	131	6.85993	0.913599	131	12.5781	0.92504	131	11.3799	0.906079	131	14.402	0.912501	131	13.9065	1.07919	131	8.66678	0.886393	131	15.4043	1.09658	131	9.2745	1.07314	131	7.91285	1.10109	131	10.4418
P02077	Hemoglobin subunit beta-A OS=Capra hircus OX=9925 PE=1 SV=1 - [HBBA_CAPHI]	2424.01	78.62	9	9	12	251	0.940853	228	11.8339	0.928475	228	11.2453	0.9384	228	13.8316	0.915459	228	11.0933	0.921666	228	10.1961	1.11902	228	10.1763	1.11986	228	10.2514	1.14462	228	10.8084	1.14346	228	11.955	0.96448	228	10.276	1.10709	228	12.4884	0.962596	228	9.39951	0.946907	228	9.36321	0.922474	228	10.9873
A0A452ETX9	Uncharacterized protein OS=Capra hircus OX=9925 GN=LOC102175560 PE=3 SV=1 - [A0A452ETX9_CAPHI]	2293.79	26.63	3	21	33	256	0.830301	81	13.2568	0.813364	81	12.3002	0.813164	81	13.0872	0.826271	81	13.4811	0.812663	81	14.712	1.08643	81	8.32891	1.07521	81	7.55279	1.08226	81	7.02243	1.10779	81	8.58403	1.05697	81	7.58312	1.07494	81	7.13004	1.10921	81	7.84053	1.09273	81	6.08099	1.10985	81	9.04123
A0A452FK04	Fibronectin OS=Capra hircus OX=9925 GN=FN1 PE=4 SV=1 - [A0A452FK04_CAPHI]	2210.48	30.12	13	52	52	202	1.07966	202	9.36636	1.05256	202	8.95635	1.06443	202	10.4602	1.06276	202	9.9673	1.06194	202	10.4238	0.911789	202	8.99221	0.914467	202	9.27787	0.920754	202	11.0334	0.918696	202	9.8071	1.02164	202	7.46599	0.9061	202	10.9966	1.04035	202	7.07864	1.02767	202	8.06312	1.0434	202	8.23649
A0A452G0A7	Amine oxidase OS=Capra hircus OX=9925 GN=LOC102170459 PE=3 SV=1 - [A0A452G0A7_CAPHI]	2087.45	25.79	5	10	20	104	0.821341	43	20.9895	0.882897	43	14.1892	0.851348	43	16.674	0.843694	43	21.5225	0.886036	43	13.6324	1.13564	43	9.35235	1.11835	43	11.1067	1.14215	43	10.5988	1.13176	43	9.95271	1.03693	42	13.3033	1.11665	43	10.8284	1.04985	42	9.42261	1.00803	42	11.5795	1.0236	42	12.9154
A0A452FQ19	Sushi domain-containing protein OS=Capra hircus OX=9925 GN=C4BPA PE=4 SV=1 - [A0A452FQ19_CAPHI]	1901.87	34.56	3	18	20	117	1.05068	111	10.6487	1.02607	111	10.4238	1.02438	111	11.3189	1.02066	111	12.1061	1.03271	111	11.2986	1.0253	111	9.03118	1.0191	111	8.67272	1.00498	111	9.00379	1.00203	111	8.77397	0.968237	111	10.6832	1.0085	110	9.55484	0.969527	111	13.5913	0.957818	111	10.243	0.969917	111	9.46211
A0A452ED43	Apolipoprotein A4 OS=Capra hircus OX=9925 GN=APOA4 PE=3 SV=1 - [A0A452ED43_CAPHI]	1553.62	60	8	23	23	139	1.05883	137	10.9394	1.05236	137	7.88642	1.06578	137	11.0378	1.0167	137	11.6407	1.06158	137	9.38178	0.938224	137	9.36585	0.923886	137	8.65107	0.944572	137	9.88385	0.927344	137	9.60123	1.01431	137	9.09854	0.914623	136	7.8313	1.04469	137	9.00615	1.00279	137	9.00146	1.02967	137	8.5912
A0A452FKE5	Complement C4 gamma chain OS=Capra hircus OX=9925 GN=LOC102189753 PE=4 SV=1 - [A0A452FKE5_CAPHI]	1492.05	27.9	3	20	40	128	1.12142	70	12.5245	1.11113	70	12.8824	1.11479	70	8.84416	1.06491	70	11.5696	1.08982	70	11.7791	0.91233	70	8.83777	0.900262	70	9.28627	0.899361	70	9.84868	0.887664	70	12.724	0.981156	70	7.79914	0.907879	70	15.0324	1.03305	70	9.80335	1.00983	70	8.00438	0.982447	70	10.1146
A0A452FX49	Hemoglobin subunit beta-C OS=Capra hircus OX=9925 GN=HBBC PE=3 SV=1 - [A0A452FX49_CAPHI]	1272.81	80.28	15	7	11	110	1.03485	68	8.52794	1.02044	68	10.2642	1.04523	68	7.95488	0.984155	68	6.26803	1.03249	68	11.6024	1.01102	68	8.02023	1.04914	68	7.55841	1.03288	68	7.41364	1.05653	68	9.10776	0.951436	68	8.27464	0.997572	68	9.15279	0.975019	68	6.74932	0.942926	68	10.2858	0.972312	68	7.50224
A0A452ELS1	Serpin domain-containing protein OS=Capra hircus OX=9925 GN=LOC102186111 PE=3 SV=1 - [A0A452ELS1_CAPHI]	1266.04	39.9	1	5	14	131	1.04382	83	13.8539	1.02642	83	11.9919	1.02177	83	9.54901	1.04485	83	8.41405	1.04772	83	9.30234	0.92551	83	11.5809	0.951416	83	10.3945	0.940279	83	9.81678	0.940147	83	10.5441	1.04265	83	7.86709	0.936538	83	12.9334	1.01256	83	9.23693	1.04152	83	7.65803	1.03946	83	8.41092
A0A452EW49	Transferrin-like domain-containing protein OS=Capra hircus OX=9925 GN=LOC102172488 PE=3 SV=1 - [A0A452EW49_CAPHI]	1248.19	43.9	2	7	26	135	1.00062	37	7.46495	1.00113	37	6.30539	1.03688	37	7.86298	0.999943	37	4.24751	1.00178	37	8.28152	0.868886	37	8.90285	0.895267	37	11.3058	0.869741	37	8.22737	0.865946	37	8.98748	1.0778	37	5.97526	0.856428	37	12.076	1.10959	37	9.55331	1.09164	37	8.90847	1.15024	37	5.83893
A0A452FTH7	Anaphylatoxin-like domain-containing protein OS=Capra hircus OX=9925 GN=LOC102170693 PE=4 SV=1 - [A0A452FTH7_CAPHI]	1177.68	20.01	4	6	26	86	1.13584	28	12.4419	1.13695	28	8.7451	1.14549	28	10.184	1.19234	28	9.18542	1.14697	28	11.8333	0.906002	28	11.5162	0.901835	28	12.0272	0.895613	28	11.6955	0.893514	28	12.1428	0.960956	28	6.37086	0.908277	28	8.3779	1.00473	28	11.0681	0.983742	28	9.20773	1.00489	28	9.05236
A0A452G0I5	Inter-alpha-trypsin inhibitor heavy chain 3 OS=Capra hircus OX=9925 GN=ITIH3 PE=3 SV=1 - [A0A452G0I5_CAPHI]	1166.89	20.88	15	18	19	99	1.00838	98	9.78016	1.01098	98	7.12437	1.0016	98	8.39273	0.983013	98	7.25161	1.01228	98	8.15291	0.949715	98	11.0592	0.929574	98	8.22412	0.953489	98	9.51308	0.951798	98	9.50467	1.05401	98	7.06431	0.950196	98	11.9435	1.06792	98	6.08304	1.04939	97	7.2425	1.05854	98	8.52808
A0A452E6A2	Serpin domain-containing protein OS=Capra hircus OX=9925 GN=LOC102174291 PE=3 SV=1 - [A0A452E6A2_CAPHI]	1140.36	36.21	1	15	18	110	1.06757	89	9.866	1.03616	89	11.4665	1.04389	89	9.06059	1.05648	89	14.6808	1.03866	89	11.3909	0.98798	89	7.47158	1.00398	89	9.33185	1.00223	89	11.2517	1.0129	89	7.07572	0.949245	89	10.0584	0.994408	89	6.42523	0.96071	89	11.4775	0.97098	89	9.84661	0.965076	89	11.7297
A0A452FUX6	Inter-alpha-trypsin inhibitor heavy chain 2 OS=Capra hircus OX=9925 GN=ITIH2 PE=3 SV=1 - [A0A452FUX6_CAPHI]	1097.11	29.73	4	22	22	115	1.0332	115	7.21087	1.01414	115	9.37446	1.03391	115	10.2772	0.996189	115	8.7624	1.01717	115	6.60404	0.8561	115	11.1814	0.841477	115	11.319	0.851648	115	12.5009	0.862414	115	12.6308	1.10091	115	7.22494	0.837363	115	13.9638	1.1474	115	9.86844	1.10409	113	7.55076	1.12485	114	8.80108
A0A452DSW4	Amine oxidase OS=Capra hircus OX=9925 GN=LOC102168295 PE=3 SV=1 - [A0A452DSW4_CAPHI]	1066.98	14.02	3	2	11	58	0.930596	9	6.0677	0.898606	9	9.39964	0.994099	9	11.0586	0.855362	9	6.08333	0.990384	9	3.51603	0.579384	9	55.8454	0.630429	9	60.0126	0.638159	9	59.5741	0.53255	9	24.4662	1.38534	9	7.34994	0.591651	9	64.8434	1.43564	9	18.8705	1.37916	9	17.102	1.4884	9	17.6479
A0A452FJ07	Serpin family A member 1 OS=Capra hircus OX=9925 GN=SERPINA1 PE=3 SV=1 - [A0A452FJ07_CAPHI]	1052.32	45.58	8	2	24	165	0.623103	4	31.8652	1.43203	4	3.59845	1.38927	4	3.29919	0.740957	4	21.5759	1.3884	4	11.5171	1.22272	4	13.6704	0.632359	4	13.6662	1.30144	4	4.12973	0.620056	4	28.4995	1.33239	4	13.7255	1.30211	4	10.779	1.33572	4	10.2836	0.604151	4	23.4152	0.681241	4	22.3099
A0A8C2XSD9	Serpin family A member 12 OS=Capra hircus OX=9925 GN=SERPINA12 PE=3 SV=1 - [A0A8C2XSD9_CAPHI]	1035.86	41.48	8	1	23	164	0.807956	3	60.1815	1.22979	3	24.2176	1.47424	3	1.90893	0.836026	3	41.6407	1.33987	3	18.7903	1.21222	3	21.6394	0.538802	3	1.23013	1.13601	3	38.096	0.726386	3	56.5056	1.35041	3	25.1986	1.24418	3	30.945	1.11363	3	26.5376	0.764322	3	78.7498	0.664307	3	62.4369
A0A452EMA2	Vitronectin OS=Capra hircus OX=9925 GN=VTN PE=4 SV=1 - [A0A452EMA2_CAPHI]	1031.38	44.42	5	14	15	66	0.970268	63	8.10004	0.979364	63	13.4935	0.974848	63	10.4566	0.946458	63	11.1661	0.946881	63	9.58458	0.964549	63	11.1086	0.9548	63	9.96639	0.962563	63	11.9823	0.934621	63	13.3236	1.07349	63	10.3681	0.95247	63	11.6261	1.07842	63	9.74002	1.06967	63	11.5224	1.10736	63	10.1134
A0A8C2P6J0	Immunoglobulin C1-set domain-containing protein OS=Capra hircus OX=9925 PE=4 SV=1 - [A0A8C2P6J0_CAPHI]	974.822	14.06	1	3	3	91	1.04209	91	8.08533	1.03109	91	7.23136	1.02633	91	10.219	1.00102	91	6.55208	1.02887	91	10.0258	1.06974	91	10.4527	1.09426	91	8.87523	1.05946	91	6.59041	1.10176	91	9.34176	0.914216	91	11.9933	1.06419	91	7.84512	0.895181	91	9.01655	0.912622	91	12.4503	0.927794	91	10.3499
A0A452FR95	C3/C5 convertase OS=Capra hircus OX=9925 GN=CFB PE=4 SV=1 - [A0A452FR95_CAPHI]	928.981	47.57	3	34	34	124	1.02558	124	7.02068	1.02197	124	7.47899	1.03354	124	8.10057	1.01718	124	8.62262	1.03052	124	7.88836	0.91182	124	7.49489	0.910487	124	7.97249	0.906368	124	8.25848	0.914357	124	8.54447	1.06699	124	7.40127	0.897579	124	7.6625	1.0734	124	7.59749	1.0619	124	7.99904	1.08376	124	7.49234
A0A452E2C0	Transthyretin OS=Capra hircus OX=9925 GN=TTR PE=3 SV=1 - [A0A452E2C0_CAPHI]	924.312	81.89	9	10	10	84	0.967563	83	11.7525	0.944915	83	9.56235	0.995185	83	10.5245	0.936596	83	12.2694	0.973336	83	7.28336	0.93293	83	11.6101	0.912813	83	9.55242	0.904153	83	8.76448	0.910069	83	6.96868	1.07441	83	10.2189	0.904953	83	9.30858	1.12632	83	14.5885	1.07795	83	9.07928	1.11655	83	13.48
A0A452ES52	Serpin family D member 1 OS=Capra hircus OX=9925 GN=SERPIND1 PE=3 SV=1 - [A0A452ES52_CAPHI]	890.414	20.11	1	2	11	52	0.608516	2	60.8015	1.14928	2	37.9719	1.4759	2	4.81485	0.664571	2	35.936	1.32997	2	26.8912	1.22635	2	21.2749	0.686235	2	44.6534	1.30924	2	3.39099	0.823683	2	32.0938	1.42586	2	4.16209	1.1167	2	33.4307	1.20062	2	24.0317	0.604782	2	44.617	0.634042	2	21.5843
A0A8C2Y0H4	Serpin domain-containing protein OS=Capra hircus OX=9925 PE=3 SV=1 - [A0A8C2Y0H4_CAPHI]	882.679	17.78	1	1	10	52	1.07963	2	2.49501	1.06464	2	2.15441	1.00103	2	2.60041	1.04908	2	6.8195	1.00562	2	7.60763	0.997271	2	6.35933	1.03913	2	1.35852	1.10541	2	6.04146	1.00253	2	1.18569	0.914263	2	6.03995	1.03566	2	3.0622	0.948894	2	4.97287	1.0143	2	5.50002	0.951341	2	3.53603
A0A8C2NP75	Paraoxonase OS=Capra hircus OX=9925 PE=3 SV=1 - [A0A8C2NP75_CAPHI]	880.537	59.73	8	17	17	74	1.06665	74	7.68298	1.03854	74	9.54286	1.07582	74	9.67761	1.02683	74	11.7789	1.06554	74	8.81243	0.99569	74	7.66322	0.973869	74	9.1921	0.972322	74	5.95916	0.998623	74	6.96811	0.96092	74	8.75231	0.977838	74	7.2672	0.994307	74	6.56201	0.961121	74	10.9803	0.98415	74	11.7075
A0A452E4V7	Antithrombin-III OS=Capra hircus OX=9925 GN=SERPINC1 PE=3 SV=1 - [A0A452E4V7_CAPHI]	850.161	42.21	4	20	20	103	1.03084	102	10.6008	1.02188	103	8.19793	1.02976	103	10.2003	1.00057	103	10.2974	1.02424	103	7.86829	0.953478	103	7.99752	0.94902	103	8.07822	0.952343	103	8.8177	0.979207	103	7.93297	1.00256	103	7.28464	0.95198	103	10.1217	1.04254	103	9.04358	0.999975	103	7.68488	1.03373	103	8.71889
A0A8C2R2U7	Plasminogen OS=Capra hircus OX=9925 GN=PLG PE=3 SV=1 - [A0A8C2R2U7_CAPHI]	810.609	44.87	6	24	27	80	0.91485	75	12.4662	0.904655	75	11.6379	0.90901	75	10.4539	0.89162	75	11.7598	0.917076	75	9.16376	1.08179	75	6.66648	1.06663	75	7.38302	1.07197	75	7.10723	1.08568	75	8.4274	0.998243	75	7.68379	1.0655	75	6.01289	1.03248	75	8.43806	0.998606	75	6.30643	1.02956	75	10.4798
A0A452DYG7	Lipid-binding serum glycoprotein N-terminal domain-containing protein OS=Capra hircus OX=9925 GN=LOC102171351 PE=4 SV=1 - [A0A452DYG7_CAPHI]	807.323	28.57	2	3	4	104	0.868249	38	17.331	0.825228	38	16.0982	0.839862	38	15.1457	0.825597	38	13.705	0.860184	38	15.1548	1.24562	38	19.1141	1.25027	38	19.8599	1.24724	38	18.4106	1.27687	38	18.4482	0.847553	38	16.779	1.23379	38	12.1527	0.912997	38	12.2133	0.871569	38	22.7669	0.916861	38	17.5377
A0A452DYV8	Alpha-2-glycoprotein 1, zinc-binding OS=Capra hircus OX=9925 GN=AZGP1 PE=3 SV=1 - [A0A452DYV8_CAPHI]	801.495	34.45	1	1	8	45	0.995809	5	2.30114	0.961043	5	10.6214	0.906028	5	4.22174	0.93054	5	5.23924	0.939979	5	7.58017	0.755581	5	7.61814	0.75464	5	14.7454	0.764057	5	15.6447	0.776985	5	11.5574	1.26275	5	6.69202	0.773349	5	18.2575	1.28241	5	5.50216	1.27544	5	8.57954	1.28285	5	2.59512
A0A8C2SB38	Alpha-2-glycoprotein 1, zinc-binding OS=Capra hircus OX=9925 PE=3 SV=1 - [A0A8C2SB38_CAPHI]	801.495	33.99	2	1	8	41	0.915175	1		0.899128	1		0.892489	1		0.938451	1		0.944118	1		1.51337	1		1.49954	1		1.5025	1		1.53685	1		0.657248	1		1.50679	1		0.593455	1		0.668555	1		0.602185	1
A0A8C2RRV2	Serpin family F member 2 OS=Capra hircus OX=9925 PE=3 SV=1 - [A0A8C2RRV2_CAPHI]	788.365	24.41	4	9	9	58	0.942548	58	8.28037	0.938144	58	8.61905	0.919621	58	8.86541	0.930196	58	9.19511	0.930815	58	6.29075	1.02469	58	7.79758	1.03319	58	8.05934	1.0417	58	7.87955	1.04418	58	9.75624	1.02188	58	10.2554	1.03883	58	6.11659	1.04015	58	9.27037	1.027	58	8.25941	1.04936	58	7.10302
A0A452EHT7	Inter-alpha-trypsin inhibitor heavy chain 4 OS=Capra hircus OX=9925 GN=ITIH4 PE=3 SV=1 - [A0A452EHT7_CAPHI]	769.5	28.54	11	1	21	102	1.04872	6	13.3842	1.06449	6	7.32606	1.05251	6	10.3544	1.02212	6	11.9041	1.04034	6	8.14747	1.00711	6	11.3101	1.01526	6	6.63607	1.06467	6	5.74094	0.977136	6	9.77462	0.981516	6	9.53889	1.0314	6	15.1938	0.998581	6	6.38219	0.966055	6	7.01444	0.945385	6	6.56609
A0A452F1I4	Thrombospondin 1 OS=Capra hircus OX=9925 GN=THBS1 PE=3 SV=1 - [A0A452F1I4_CAPHI]	758.627	21.24	5	23	23	50	1.00861	50	10.4303	1.00531	50	11.195	0.999814	50	13.7408	1.01851	50	11.0634	1.02343	50	11.5003	0.902459	50	14.0291	0.920748	50	11.6839	0.894402	50	12.8681	0.913384	50	9.51152	1.04107	50	10.1695	0.923468	50	13.7329	1.07092	50	11.5901	1.11047	50	8.21567	1.06577	50	12.3473
A0A8C2P859	Kininogen 1 OS=Capra hircus OX=9925 PE=4 SV=1 - [A0A8C2P859_CAPHI]	710.852	34.64	2	1	15	56	0.984645	11	7.34977	0.942862	11	13.3449	0.93555	11	8.56624	0.971006	11	4.01612	0.967804	11	2.84912	0.948552	11	5.79592	1.03072	11	4.44918	1.01434	11	9.8935	0.955927	11	9.85396	1.03836	11	4.33699	1.04241	11	9.69824	1.03951	11	6.9618	1.1035	11	5.9971	1.03987	11	10.823
A0A452FX21	Prothrombin OS=Capra hircus OX=9925 GN=F2 PE=3 SV=1 - [A0A452FX21_CAPHI]	707.298	35.96	2	16	16	62	0.99442	62	10.3392	0.980307	62	8.318	0.989291	62	8.13818	0.964752	62	9.11329	0.970975	62	6.87631	1.05931	62	6.0158	1.06262	62	6.10984	1.04912	62	6.23602	1.07599	62	6.1909	0.957434	62	7.34212	1.05045	62	6.38775	0.981563	62	8.22386	0.96239	62	5.92216	0.987376	62	6.76375
A0A452EWI1	Apolipoprotein B OS=Capra hircus OX=9925 GN=APOB PE=4 SV=1 - [A0A452EWI1_CAPHI]	702.57	10.13	2	41	41	76	1.03483	76	5.82972	1.00683	76	7.20694	0.993941	76	8.33447	0.99836	76	9.57161	0.996394	76	7.53061	1.16916	76	8.74827	1.18494	76	8.67437	1.17548	76	8.39931	1.22213	76	9.24309	0.86142	76	11.1838	1.18154	76	7.45039	0.82416	76	11.9365	0.850976	76	13.87	0.839265	76	13.2392
A0A452E2Y0	Clusterin OS=Capra hircus OX=9925 GN=LOC102182127 PE=3 SV=1 - [A0A452E2Y0_CAPHI]	684.476	31.89	7	14	14	44	1.04957	44	13.6178	1.02659	44	9.21453	1.05302	44	13.5262	1.07841	44	15.1237	1.05204	44	11.0096	0.982466	44	8.68764	0.981175	44	7.91684	0.94701	44	7.76142	0.974577	44	8.60742	0.953694	44	8.74906	0.942449	44	7.12369	0.976501	44	11.5986	0.993405	44	11.1708	1.01462	44	18.201
A0A452EI28	Inter-alpha-trypsin inhibitor heavy chain 4 OS=Capra hircus OX=9925 GN=ITIH4 PE=3 SV=1 - [A0A452EI28_CAPHI]	668.093	28.38	11	1	21	97	0.895223	1		0.800989	1		0.751003	1		0.939839	1		0.820717	1		1.36152	1		1.4387	1		1.41238	1		1.54671	1		0.774828	1		1.37761	1		0.69588	1		0.832398	1		0.719929	1
A0A452FF76	Sushi domain-containing protein OS=Capra hircus OX=9925 GN=CFH PE=4 SV=1 - [A0A452FF76_CAPHI]	666.73	23.22	4	17	23	54	1.056	35	9.31758	1.0286	35	10.2141	1.01238	35	14.0498	0.993648	35	10.4249	1.03489	35	8.8171	0.924037	35	11.7217	0.944921	35	13.5544	0.931114	35	10.0841	0.980165	35	8.72827	1.01788	35	8.13497	0.944815	35	10.7223	1.00557	35	10.7072	1.03968	35	7.49559	1.04072	35	10.6354
Q207D0	Complement component 3d (Fragment) OS=Capra hircus OX=9925 PE=2 SV=1 - [Q207D0_CAPHI]	665.393	64.51	1	1	17	161	1.02466	6	14.4507	1.13611	6	15.853	0.941757	6	14.3076	0.987163	6	6.31559	1.13081	6	15.5633	1.02772	6	14.2554	0.708341	6	53.8114	0.84895	6	28.0469	0.871469	6	10.7021	1.11399	6	13.7002	1.06605	6	7.1041	1.15759	6	19.1192	1.03435	6	11.0788	1.19273	6	18.3612
A0A8C2P4G6	Transferrin-like domain-containing protein OS=Capra hircus OX=9925 PE=4 SV=1 - [A0A8C2P4G6_CAPHI]	660.223	41.81	2	1	16	81	1.36445	1		1.24583	1		1.29075	1		1.22682	1		1.28256	1		0.966855	1		0.949229	1		0.906454	1		0.978335	1		0.764211	1		0.876109	1		0.828175	1		0.849653	1		0.841387	1
P0CH25	Hemoglobin subunit alpha-1 OS=Capra hircus OX=9925 GN=HBA1 PE=1 SV=1 - [HBA1_CAPHI]	623.741	75.35	8	1	11	52	0.971652	5	9.5825	0.929358	5	7.61134	0.934594	5	8.83486	0.940816	5	4.90992	0.934499	5	3.06246	1.13117	5	6.1356	1.17158	5	1.05762	1.16386	5	5.09204	1.10233	5	11.8392	0.920732	5	17.114	1.16724	5	2.90981	0.939576	5	5.57022	0.959587	5	6.41921	1.01345	5	5.79696
A0A452EPW9	SRCR domain-containing protein OS=Capra hircus OX=9925 PE=4 SV=1 - [A0A452EPW9_CAPHI]	566.975	34.27	2	7	9	44	0.94858	31	12.6879	0.927416	31	13.3839	0.932647	31	13.1211	0.909963	31	16.8309	0.95492	31	10.7391	1.15091	31	7.98913	1.13505	31	6.88981	1.15512	31	4.05413	1.20982	31	6.95374	0.986586	31	12.967	1.13229	31	6.54407	0.97758	31	11.9018	0.953386	31	13.3453	0.916411	31	14.8137
C6ZP52	II alpha globin OS=Capra hircus OX=9925 GN=HBAII PE=3 SV=1 - [C6ZP52_CAPHI]	563.317	95.07	9	2	12	50	0.902341	3	2.74484	0.947992	3	12.2314	0.950541	3	10.5469	0.927972	3	8.80769	0.910678	3	9.10785	1.02803	3	0.87305	0.980829	3	3.96808	1.04821	3	2.55343	1.12265	3	8.38567	0.986948	3	8.30543	1.08468	3	5.45604	1.04587	3	3.54183	0.896128	3	9.30088	1.10144	3	5.25819
A0A452E819	Kininogen 1 OS=Capra hircus OX=9925 GN=KNG1 PE=4 SV=1 - [A0A452E819_CAPHI]	549.864	35.38	2	9	23	81	0.936843	36	15.9213	0.905955	36	15.7792	0.899897	36	21.256	0.907368	36	15.1828	0.920534	36	15.3487	1.04048	36	9.59764	1.04908	36	9.90282	1.03727	36	8.2748	1.04855	36	11.7936	1.04418	36	6.30492	0.994816	36	8.44051	1.07144	36	8.03978	1.08217	36	6.53834	1.10738	36	10.8072
A0A452ENB6	Complement C9 OS=Capra hircus OX=9925 GN=C9 PE=3 SV=1 - [A0A452ENB6_CAPHI]	539.248	23.72	3	11	11	50	0.991196	48	6.6364	0.950404	48	5.09521	0.972602	48	7.51623	0.967728	48	8.48673	0.953861	48	6.3857	0.977208	48	7.57557	0.981248	48	6.52261	0.978517	48	5.53712	0.997889	48	4.54903	1.05044	48	7.43034	0.96508	48	5.15183	1.068	48	6.72792	1.06039	48	7.93583	1.07262	48	5.6662
A0A452GAG0	Protein AMBP OS=Capra hircus OX=9925 GN=AMBP PE=3 SV=1 - [A0A452GAG0_CAPHI]	536.881	24.93	6	9	9	42	1.00094	41	8.93903	1.03443	41	11.6516	1.02297	41	8.58925	0.984447	41	11.0193	1.00768	41	6.30237	0.936364	41	13.4164	0.86649	41	18.2048	0.909324	41	13.7407	0.886441	41	11.0026	1.09025	41	11.8009	0.91397	41	13.3145	1.11956	41	10.5915	1.06729	41	12.1653	1.10735	41	14.9342
A0A8C2P8C7	Fetuin B OS=Capra hircus OX=9925 PE=4 SV=1 - [A0A8C2P8C7_CAPHI]	524.077	40.85	1	2	12	50	1.09801	6	8.91687	1.0608	6	2.58054	1.11704	6	7.75239	1.08528	6	4.73866	1.06793	6	2.53597	0.89096	6	6.19602	0.928054	6	2.94598	0.886555	6	5.71757	0.916738	6	3.42043	0.991036	6	3.55784	0.89711	6	6.85625	1.04315	6	6.10512	0.976645	6	5.41272	1.09127	6	8.22709
A0A452FD71	Fetuin B OS=Capra hircus OX=9925 GN=FETUB PE=4 SV=1 - [A0A452FD71_CAPHI]	519.396	38.76	1	1	11	45	1.11359	1		1.00364	1		1.07557	1		1.10424	1		1.1036	1		0.863349	1		0.820077	1		0.807946	1		0.803405	1		1.00473	1		0.78436	1		1.15914	1		1.07515	1		1.19945	1
V5KXW5	Retinol-binding protein OS=Capra hircus OX=9925 PE=2 SV=1 - [V5KXW5_CAPHI]	516.335	34.83	9	6	6	25	1.03793	25	11.1776	1.01364	25	11.2871	1.08787	25	11.4688	1.0693	25	7.57067	1.03938	25	8.62271	0.899041	25	15.218	0.832869	25	9.89094	0.923463	25	19.96	0.840969	25	13.0237	1.03938	25	7.18728	0.842796	25	17.8174	1.04249	25	15.2435	1.06832	25	6.84732	1.07667	25	13.9108
A0A452ESV0	Maltase-glucoamylase OS=Capra hircus OX=9925 GN=MGAM PE=3 SV=1 - [A0A452ESV0_CAPHI]	512.453	13.95	14	5	19	37	1.02118	10	8.48636	1.00288	10	7.48517	0.944464	10	14.0543	1.04918	10	13.0459	0.986314	10	15.5329	1.05526	10	5.53196	1.01693	10	3.24279	0.998103	10	15.9608	1.03296	10	11.3132	0.971726	10	10.8164	1.02511	10	9.51653	0.908301	10	11.8658	0.955374	10	10.8889	0.946993	10	16.8688
A0A452E6D4	Complement C5 OS=Capra hircus OX=9925 GN=C5 PE=4 SV=1 - [A0A452E6D4_CAPHI]	505.704	20.96	4	30	30	65	1.16368	65	8.81484	1.16895	65	7.41113	1.16421	65	10.965	1.1783	65	12.2172	1.15003	65	7.47939	0.960513	65	4.02578	0.978209	65	4.40641	0.953967	65	5.96731	0.986151	65	6.09684	0.900145	65	8.37081	0.963109	65	6.39967	0.902871	65	9.82597	0.913993	65	7.46556	0.89653	65	7.82161
A0A8C2P7J3	Lipid-binding serum glycoprotein N-terminal domain-containing protein OS=Capra hircus OX=9925 PE=4 SV=1 - [A0A8C2P7J3_CAPHI]	473.923	33.47	1	5	6	95	0.961768	28	8.26275	0.936917	29	16.1368	0.917267	29	11.1999	0.909623	29	12.4917	0.949767	29	18.6109	1.2196	29	22.7632	1.02742	29	29.1058	1.22065	29	22.1009	1.17155	29	22.632	0.967575	29	22.598	1.20942	29	30.181	0.967458	29	18.5113	0.886897	29	29.5396	0.850134	29	28.1905
A0A8C2NQS3	Ig-like domain-containing protein OS=Capra hircus OX=9925 PE=4 SV=1 - [A0A8C2NQS3_CAPHI]	466.467	25.62	4	6	6	31	1.10522	31	14.2122	1.1173	31	9.71714	1.14545	31	12.4295	1.10145	31	10.5274	1.08656	31	13.9427	0.96952	31	9.32413	0.979364	31	8.46908	0.948382	31	6.7936	0.96096	31	9.16256	0.989401	31	7.36642	0.947856	31	10.509	0.988772	31	11.8587	0.968824	31	12.3087	1.00424	31	8.2979
A0A452E2F6	Alpha-1-acid glycoprotein OS=Capra hircus OX=9925 GN=AGP PE=3 SV=1 - [A0A452E2F6_CAPHI]	445.504	43.07	3	11	11	39	1.48572	39	13.6126	1.46943	39	11.9625	1.45785	39	12.98	1.42843	39	15.4323	1.47374	39	13.7246	0.610814	39	28.2146	0.614367	39	27.8296	0.582764	39	30.5181	0.542216	39	29.1257	0.998183	39	7.95204	0.566103	39	33.7452	1.00825	39	7.23559	1.00185	39	3.9175	1.01221	39	7.38474
A0A8C2RX59	Angiotensinogen OS=Capra hircus OX=9925 PE=3 SV=1 - [A0A8C2RX59_CAPHI]	437.109	17.14	3	7	7	21	0.950976	21	8.50802	0.952939	21	7.70839	0.963818	21	5.58921	0.973403	21	9.54901	0.967048	21	6.09415	1.04782	21	5.20356	1.05628	21	4.83852	1.06591	21	4.66379	1.07761	21	7.65053	0.978238	21	6.30038	1.03179	21	6.14995	1.00642	21	6.98238	0.974107	21	5.32982	1.0205	21	4.77609
A0A8C2RP22	Maltase-glucoamylase OS=Capra hircus OX=9925 PE=3 SV=1 - [A0A8C2RP22_CAPHI]	411.203	12.28	23	1	15	30	1.07366	3	14.6639	1.13727	3	10.249	1.14291	3	4.00746	1.00023	3	6.21456	1.10126	3	0.760973	1.00734	3	8.7968	1.01859	3	1.61226	0.945608	3	9.92671	0.957121	3	4.47304	0.937327	3	6.07912	0.913988	3	5.2451	0.984085	3	4.11458	0.958729	3	14.5167	0.984897	3	1.18305
A0A8C2QQE4	Complement C1r OS=Capra hircus OX=9925 PE=4 SV=1 - [A0A8C2QQE4_CAPHI]	396.714	20	4	11	11	23	0.976684	23	4.41611	0.991039	23	6.3798	0.950817	23	6.23417	0.973224	23	11.5058	0.976746	23	8.02542	0.965611	23	8.3468	0.966061	23	7.34494	0.968057	23	8.95701	1.00027	23	13.3615	1.06105	23	8.3044	0.990812	23	4.97224	1.07431	23	6.65584	1.04806	23	9.79227	1.05134	23	4.60036
A0A452FNW6	Glyceraldehyde-3-phosphate dehydrogenase OS=Capra hircus OX=9925 GN=GAPDH PE=3 SV=1 - [A0A452FNW6_CAPHI]	377.031	21.02	14	2	7	23	1.57564	13	16.9001	1.70908	13	29.7769	1.58492	13	26.2139	1.59133	13	24.5215	1.65034	13	24.7409	0.776048	13	19.3871	0.804767	13	15.7854	0.723068	13	21.6839	0.75267	13	28.5802	0.636659	13	49.8689	0.793607	13	17.5905	0.614286	13	45.8053	0.680466	13	39.0803	0.640734	13	22.2765
A0A452F2N7	Fibulin-1 OS=Capra hircus OX=9925 GN=FBLN1 PE=3 SV=1 - [A0A452F2N7_CAPHI]	370.294	21.14	7	4	8	12	1.05738	7	5.9628	1.01967	7	4.27732	1.04831	7	11.9127	1.02066	7	11.4431	1.03413	7	6.3446	0.994	7	10.5219	0.954504	7	9.23893	0.961384	7	7.21154	0.978015	7	9.72133	1.05996	7	2.43115	0.906193	7	5.49299	1.02582	7	11.1269	1.03085	7	4.53155	0.992851	7	5.70766
A0A452FV45	Lumican OS=Capra hircus OX=9925 GN=LUM PE=4 SV=1 - [A0A452FV45_CAPHI]	367.59	32.46	2	7	7	17	0.99583	17	10.4253	1.04385	17	7.54673	1.00884	17	8.1269	1.03285	17	10.903	1.03082	17	8.31983	0.984989	17	6.7794	0.945746	17	7.47532	0.937682	17	6.35414	0.947006	17	7.00926	1.01853	17	5.18491	0.960327	17	10.7095	1.04079	17	7.64353	0.996421	17	5.03147	1.04817	17	5.31224
A0A452F9F6	Serpin family G member 1 OS=Capra hircus OX=9925 GN=SERPING1 PE=3 SV=1 - [A0A452F9F6_CAPHI]	363.704	23.88	10	10	10	38	1.05233	37	7.19938	1.00906	37	6.57713	1.05858	37	10.8683	1.00709	38	8.96971	1.0348	37	8.0122	0.962635	37	8.22258	0.949892	37	11.0845	0.946722	37	7.44718	0.994461	37	6.35664	0.974303	38	7.61803	0.958165	37	9.54886	1.01353	37	7.3788	0.993262	37	5.78534	1.01277	37	7.0429
A0A8C2RGX9	Fibrinogen alpha chain OS=Capra hircus OX=9925 PE=4 SV=1 - [A0A8C2RGX9_CAPHI]	358.591	13.28	4	12	12	26	1.07647	26	6.92966	1.06084	26	4.78951	1.02376	26	4.81787	1.05635	26	6.67213	1.04472	26	4.53537	1.02116	26	7.42855	1.03651	26	6.31387	1.0283	26	7.31823	1.05284	26	4.76883	0.930304	26	5.16212	1.00913	26	6.79229	0.930942	26	6.44307	0.954938	26	6.1354	0.953465	26	4.53516
A0A8C2R597	Serpin domain-containing protein OS=Capra hircus OX=9925 PE=4 SV=1 - [A0A8C2R597_CAPHI]	353.99	31.03	1	3	5	88	1.093	14	10.3322	0.998453	14	7.10651	1.0279	14	6.22893	1.11222	14	8.39374	1.00985	14	8.73537	1.06686	14	6.52307	1.11364	14	4.48834	1.03709	14	8.79741	1.10743	14	3.29746	0.866522	14	10.0935	1.05755	14	3.33517	0.862385	14	6.82527	0.985296	14	12.1851	0.911904	14	14.2667
A0A452F2I0	Vanin 1 OS=Capra hircus OX=9925 GN=VNN1 PE=3 SV=1 - [A0A452F2I0_CAPHI]	352.993	13.81	4	6	6	29	0.883303	29	7.89013	0.803665	29	11.2289	0.861997	29	10.0421	0.842786	29	8.20011	0.844853	29	7.4013	1.24441	29	8.92319	1.18883	29	6.67724	1.25951	29	6.44065	1.29976	29	7.95721	0.895553	29	6.90005	1.1988	29	7.66297	0.928439	29	6.16278	0.935854	29	5.473	0.935845	29	7.78774
A0A452ELE7	Complement C2 OS=Capra hircus OX=9925 GN=C2 PE=4 SV=1 - [A0A452ELE7_CAPHI]	349.858	16.42	5	11	11	28	1.09953	28	12.3041	1.06025	28	6.06064	1.07103	28	4.60121	1.06803	28	6.97226	1.08785	28	5.48117	0.943612	28	8.20909	0.945236	28	7.78785	0.926841	28	11.8617	0.951763	28	6.89077	0.98167	28	7.76548	0.923146	28	5.04803	1.04066	28	6.11429	1.00279	28	7.33122	1.02562	28	6.50733
A0A452ED72	Anaphylatoxin-like domain-containing protein OS=Capra hircus OX=9925 GN=LOC102179374 PE=4 SV=1 - [A0A452ED72_CAPHI]	344.057	12.75	5	18	18	34	0.955723	34	8.13398	0.958829	34	6.31386	0.936729	34	7.15631	0.94126	34	6.75411	0.942231	34	7.76576	0.9965	34	6.72338	1.02109	34	5.77215	1.00183	34	6.4932	1.01188	34	6.25602	1.02493	34	5.64938	1.02779	34	6.44055	1.03564	34	8.00577	1.04728	34	9.75185	1.03421	34	8.34125
C6KGS5	Catalase (Fragment) OS=Capra hircus OX=9925 GN=CAT PE=2 SV=1 - [C6KGS5_CAPHI]	334.357	24.02	9	9	9	20	0.989906	20	7.62259	1	20	13.7433	1.00073	20	9.25082	0.973296	20	10.368	1.01843	20	10.7536	1.06611	20	8.73685	1.02399	20	12.1487	1.03809	20	11.4692	1.02867	20	9.60349	1.02202	20	14.2465	1.03655	20	17.3176	0.999889	20	7.25794	0.94256	20	10.4909	0.965528	20	8.75049
A0A452F9U7	Hyaluronan binding protein 2 OS=Capra hircus OX=9925 GN=HABP2 PE=4 SV=1 - [A0A452F9U7_CAPHI]	332.791	23.13	4	8	8	17	0.934782	17	5.32597	0.955889	17	4.46079	0.949949	17	8.70234	1.00118	17	6.55646	0.983222	17	8.57275	1.01775	17	7.77759	1.0385	17	3.94846	1.02657	17	4.86821	1.0294	17	6.5557	1.00276	17	6.56434	1.03706	17	7.52857	0.97191	17	6.2917	1.02239	17	5.80927	1.02607	17	3.79613
A0A452EH87	Ig-like domain-containing protein OS=Capra hircus OX=9925 PE=4 SV=1 - [A0A452EH87_CAPHI]	330.743	19.49	1	2	2	7	0.717196	7	18.2696	0.662519	7	37.6547	0.628672	7	29.2986	0.712413	6	42.6903	0.595349	6	39.2355	1.26679	7	22.3867	1.28256	7	15.3729	1.28707	7	18.3435	1.1213	7	14.1398	1.00658	7	6.64209	1.27025	7	17.1018	1.01935	7	27.1644	1.07258	7	12.0027	1.14251	7	8.46902
A0A452E8D3	Ig-like domain-containing protein OS=Capra hircus OX=9925 PE=4 SV=1 - [A0A452E8D3_CAPHI]	315.984	31.91	2	2	4	30	0.885086	21	11.3074	0.911525	21	12.2395	0.942839	21	7.94744	0.88443	21	10.2224	0.957224	21	10.2231	1.06703	21	8.05415	1.02145	21	10.3716	1.11598	21	5.19545	1.04537	21	12.9486	0.993699	21	6.63801	1.0736	21	7.6145	1.05538	21	10.1215	0.961088	21	12.3761	1.03263	21	7.79448
A0A8C2NZY1	Protein HP-20 homolog OS=Capra hircus OX=9925 GN=LOC102191308 PE=4 SV=1 - [A0A8C2NZY1_CAPHI]	312.889	43.58	2	6	6	38	1.03378	38	8.54774	0.996615	38	9.70932	0.983173	38	7.02855	1.03154	38	8.72757	0.997093	38	5.83044	1.00556	38	5.1671	1.03047	38	5.75908	1.00003	38	4.73217	1.03482	38	5.37468	0.961603	38	7.6521	0.995191	38	5.49756	0.976215	38	8.18473	1.00161	38	4.83572	1.01136	38	10.4693
A0A452FT22	Globin family profile domain-containing protein OS=Capra hircus OX=9925 GN=LOC102176710 PE=3 SV=1 - [A0A452FT22_CAPHI]	302.358	21.99	10	1	3	28	0.943889	1		0.994084	1		0.893042	1		0.949182	1		1.04592	1		1.06203	1		1.10857	1		0.888381	1		1.13713	1		1.18256	1		0.965127	1		0.964846	1		0.970654	1		1.05525	1
A0A452EVZ5	Ig-like domain-containing protein OS=Capra hircus OX=9925 PE=4 SV=1 - [A0A452EVZ5_CAPHI]	293.948	27.1	1	4	4	34	0.965969	34	6.38616	0.944006	34	6.23829	0.938085	34	7.87433	0.923618	34	8.61083	0.94925	34	7.37169	1.06154	34	7.56531	1.04896	34	8.0902	1.07649	34	6.59239	1.06295	34	12.3694	0.944688	34	7.08098	1.04459	34	7.35643	1.02159	34	5.95675	0.958631	34	7.14205	1.01575	34	5.49395
A0A452FDP5	Afamin OS=Capra hircus OX=9925 GN=AFM PE=4 SV=1 - [A0A452FDP5_CAPHI]	292.405	25.17	3	15	15	41	1.09682	41	8.97155	1.07192	41	8.71038	1.09297	41	10.3906	1.06806	41	11.788	1.07544	41	10.0504	0.920151	41	9.03728	0.90362	41	7.47709	0.90606	41	13.0524	0.918549	41	9.83677	1.03644	41	6.58678	0.902795	41	8.17057	1.02627	41	7.13472	1.02818	41	6.62873	1.02303	41	8.37635
A0A452DNE9	Apolipoprotein F OS=Capra hircus OX=9925 GN=LOC102189464 PE=4 SV=1 - [A0A452DNE9_CAPHI]	291.59	13.39	1	3	3	11	0.890717	11	26.9299	1.01708	11	7.69462	0.996733	11	6.68091	0.904562	11	24.8383	1.01845	11	10.6198	1.0079	11	7.76442	1.02118	11	10.2011	1.0272	11	9.89758	1.05438	11	14.2893	1.01743	11	11.0636	1.01181	11	12.2184	1.03591	11	7.72574	0.962181	11	7.20708	0.945581	11	21.0948
A0A8C2S478	Coagulation factor XIII B chain OS=Capra hircus OX=9925 PE=4 SV=1 - [A0A8C2S478_CAPHI]	283.908	14.98	6	7	7	14	1.00691	14	4.9105	1.00076	14	5.40094	1.03078	14	5.59378	1.01529	14	5.51788	0.988555	14	3.60341	1.05637	14	2.77558	1.08108	14	7.59502	1.04383	14	3.86003	1.10552	14	4.00743	0.892632	14	5.05623	1.07922	14	8.18604	0.952566	14	8.80294	0.967482	14	6.71924	0.9432	14	7.34095
A0A452G7G8	Joining chain of multimeric IgA and IgM OS=Capra hircus OX=9925 GN=JCHAIN PE=4 SV=1 - [A0A452G7G8_CAPHI]	275.841	47.47	3	7	7	15	0.980402	15	5.86464	1.02997	15	16.7992	1.065	15	12.5832	0.8854	15	11.8649	1.02854	15	11.6927	1.12499	15	14.0335	1.05771	15	7.20324	1.09817	15	9.75496	1.07672	15	13.0223	0.920171	15	9.41034	1.0935	15	5.95503	1.00222	15	11.3209	0.874515	15	4.37044	0.926482	15	18.6438
A0A452F2U7	Fibulin-1 OS=Capra hircus OX=9925 GN=FBLN1 PE=3 SV=1 - [A0A452F2U7_CAPHI]	269.061	13.56	2	1	5	6	1.1527	1		1.153	1		1.17078	1		1.22137	1		1.15965	1		0.907413	1		0.886532	1		0.857273	1		0.875155	1		0.98175	1		0.855877	1		0.99283	1		0.993275	1		0.946124	1
A0A452FHJ3	Gelsolin OS=Capra hircus OX=9925 GN=GSN PE=3 SV=1 - [A0A452FHJ3_CAPHI]	259.296	19.49	8	11	11	18	0.985225	18	10.0924	1.01332	18	6.58066	0.968922	18	5.98258	1.0067	18	7.50813	0.997449	18	5.83862	1.0587	18	6.18303	1.04631	18	7.78545	1.03152	18	8.09867	1.06906	18	11.7476	0.952056	18	3.30246	1.04995	18	6.87249	0.971049	18	6.57386	0.973884	18	6.11288	0.970979	18	4.22754
A0A452EZ30	Leucine rich alpha-2-glycoprotein 1 OS=Capra hircus OX=9925 GN=LRG1 PE=4 SV=1 - [A0A452EZ30_CAPHI]	258.369	22.95	2	7	7	20	0.981699	20	16.623	1.08071	20	6.3491	1.05655	20	10.0209	1.00641	20	12.5452	1.06701	20	7.38969	0.948852	20	10.2558	0.948141	20	8.56781	0.967137	20	7.88665	0.93949	20	8.50408	1.02679	20	10.1572	0.924361	20	11.0325	1.06336	20	6.78837	1.01297	20	9.75251	1.01585	20	6.31411
A0A452EQY7	Coagulation factor V OS=Capra hircus OX=9925 GN=F5 PE=3 SV=1 - [A0A452EQY7_CAPHI]	254.632	6.34	3	9	9	17	1.03125	17	9.95959	1.02007	17	8.50467	1.03347	17	11.1356	1.03877	17	8.9033	1.03069	17	8.17034	1.02413	17	8.17055	1.03972	17	3.92572	1.04061	17	9.17003	0.995422	17	10.9401	1.01796	17	9.53874	1.01972	17	17.3511	0.954517	17	11.4547	0.960242	17	7.39799	0.945274	17	9.941
A0A8C2XTH1	Serpin domain-containing protein OS=Capra hircus OX=9925 PE=4 SV=1 - [A0A8C2XTH1_CAPHI]	254.477	75.65	1	3	6	35	1.02835	7	15.2275	1.02904	7	12.1432	1.04901	7	4.98275	1.03047	7	18.4146	1.1054	7	15.6683	1.0705	7	28.7336	1.02673	7	10.4069	1.0117	7	10.4274	0.969588	7	10.107	0.935281	7	9.31029	0.966804	7	22.0847	0.981071	7	17.3283	0.994894	7	15.9122	0.99794	7	16.4938
A0A452EJM6	SRCR domain-containing protein OS=Capra hircus OX=9925 PE=4 SV=1 - [A0A452EJM6_CAPHI]	249.958	44.96	2	5	7	22	1.05811	9	17.0448	1.03748	9	15.8262	1.02698	9	16.4669	0.983039	9	15.3123	1.01101	9	13.9824	0.875082	9	17.8619	0.805035	9	11.2974	0.849923	9	16.8025	0.847192	9	17.4059	1.08421	9	10.8753	0.821319	9	28.7035	1.10475	9	3.93965	1.07441	9	5.97141	1.09266	9	8.0473
A0A8C2RG44	ACTB protein OS=Capra hircus OX=9925 PE=3 SV=1 - [A0A8C2RG44_CAPHI]	249.694	25.71	24	2	7	22	1.04298	10	3.69348	1.01397	10	7.26664	0.993902	10	3.18531	1.07657	10	10.5343	1.01855	10	13.0542	0.965301	10	8.59018	1.03502	10	4.17466	1.02072	10	10.0683	1.09548	10	7.0987	0.981912	10	9.87852	1.04277	10	9.1271	0.96719	10	4.84573	0.997288	10	9.72763	0.973445	10	16.0803
Q7M323	Plasminogen (Fragment) OS=Capra hircus OX=9925 GN=PLG PE=1 SV=1 - [PLMN_CAPHI]	245.077	49.59	1	1	4	9	0.855631	6	4.83008	0.877587	6	11.4882	0.956737	6	18.6727	0.888295	6	15.0423	0.925453	6	13.1617	1.02948	6	2.58081	1.17304	6	12.4195	1.1176	6	14.7732	1.07531	6	11.0818	1.00227	6	8.33105	0.994	6	6.30008	0.992953	6	12.3493	0.985073	6	13.9684	0.975828	6	14.5492
A0A452DKX4	Serpin domain-containing protein OS=Capra hircus OX=9925 PE=4 SV=1 - [A0A452DKX4_CAPHI]	243.935	57.39	1	1	5	38	0.954346	9	8.82338	0.948984	9	6.23406	0.937782	9	4.78458	0.966947	9	6.80757	0.949273	9	7.07503	0.858342	9	16.1429	0.887229	9	13.5691	0.867473	9	11.9457	0.865074	9	6.74218	1.10663	9	11.215	0.930082	9	9.9154	1.17229	9	6.47398	1.13951	9	7.83749	1.15188	9	7.10725
A0A8C2SCX6	C-X-C motif chemokine OS=Capra hircus OX=9925 PE=3 SV=1 - [A0A8C2SCX6_CAPHI]	241.896	22.53	3	6	6	24	1.00936	24	7.41815	0.970908	24	9.43883	0.970998	24	9.634	0.984843	24	9.60332	0.998541	24	6.78628	0.96815	24	9.19543	0.980085	24	10.4029	1.00894	24	6.56249	0.989886	24	7.15316	1.01999	24	10.246	0.994492	24	6.16614	1.06759	24	8.29805	1.01415	24	6.72926	1.0377	24	8.07984
A0A8C2SGL7	Kallikrein B1 OS=Capra hircus OX=9925 PE=4 SV=1 - [A0A8C2SGL7_CAPHI]	239.85	19.6	2	9	9	21	1.08879	21	3.7376	1.05942	21	4.17285	1.07895	21	7.56221	1.03588	21	7.84315	1.04021	21	8.91818	0.929766	21	8.44385	0.971111	21	6.92767	0.929584	21	7.54382	0.925819	21	7.18829	0.96913	21	7.2373	0.937099	21	10.7099	1.04298	21	5.86744	0.998177	21	8.06314	1.03972	21	9.807
A0A452F0C6	Peptidoglycan recognition protein 2 OS=Capra hircus OX=9925 GN=PGLYRP2 PE=3 SV=1 - [A0A452F0C6_CAPHI]	235.983	18.1	2	7	7	30	1.02447	30	6.04478	0.984098	30	7.55972	1.02958	30	7.88797	1.01495	30	10.8266	1.02269	30	7.99704	1.0009	30	7.79875	0.982687	30	6.62377	0.956604	30	8.70124	0.977408	30	12.8866	1.02899	30	7.7557	0.96342	30	11.0354	1.02867	30	5.93524	1.00799	30	9.07567	1.04224	30	7.45451
A0A8C2SJZ9	C-type lectin domain-containing protein OS=Capra hircus OX=9925 PE=4 SV=1 - [A0A8C2SJZ9_CAPHI]	230.16	28.88	6	4	4	8	1.02645	8	12.3616	1.0122	8	13.378	1.01017	8	8.71692	1.01062	8	7.79296	1.05398	8	4.12865	0.975788	8	8.97042	0.974014	8	6.21758	0.972299	8	7.20952	0.966459	8	7.56452	0.999807	8	7.60001	0.984032	8	7.59629	0.975669	8	7.39572	0.998814	8	6.60736	1.03478	8	7.64796
A0A452FWX5	Ig-like domain-containing protein OS=Capra hircus OX=9925 PE=4 SV=1 - [A0A452FWX5_CAPHI]	224.428	39.6	3	3	3	12	0.9604	12	7.50511	0.912433	12	11.3405	0.937464	12	7.76899	0.941428	12	8.2629	0.951039	12	7.74651	1.19278	12	9.08237	1.08889	12	9.81704	1.22263	12	8.88575	1.15026	12	12.6548	0.961852	12	14.8307	1.14648	12	8.95549	0.924369	12	19.6652	0.886771	12	16.5946	0.900538	12	12.3962
A0A452FBM6	Sex hormone binding globulin OS=Capra hircus OX=9925 GN=SHBG PE=4 SV=1 - [A0A452FBM6_CAPHI]	219.205	22.76	10	6	6	16	0.949765	16	15.0302	0.973426	16	13.2353	0.993156	16	20.2006	0.929536	16	9.37371	0.97998	16	10.7266	1.00344	16	7.48197	0.9776	16	7.24095	0.9969	16	7.86776	1.00334	16	6.06102	1.03999	16	3.73199	0.979079	16	9.89708	1.06811	16	11.5739	1.03448	16	7.90149	1.01246	16	15.028
A0A452E9L8	Ig-like domain-containing protein OS=Capra hircus OX=9925 PE=4 SV=1 - [A0A452E9L8_CAPHI]	217.438	31.16	1	2	2	26	1.00932	26	10.7631	0.992676	26	9.29209	0.963233	26	11.5401	0.978998	26	14.1775	1.01471	26	10.2942	0.995517	26	7.48931	1.01503	26	12.2438	0.997703	26	10.6949	1.02709	26	7.58389	0.989631	26	6.35957	0.991916	26	9.41567	1.03654	26	10.9995	0.994215	26	6.03182	0.99489	26	8.49333
A0A452F004	Complement C1q B chain OS=Capra hircus OX=9925 GN=C1QB PE=4 SV=1 - [A0A452F004_CAPHI]	213.253	17	3	3	3	12	1.00589	11	6.49554	0.9574	11	6.39433	0.990785	11	0.908748	1.00116	12	2.61382	0.976259	12	7.43912	0.948031	12	7.2758	0.960079	12	9.71918	0.905317	11	5.86867	0.9437	11	8.24509	1.054	12	6.53741	0.915446	12	7.33407	1.08966	12	3.60352	1.05048	12	3.43935	1.09923	12	9.59959
A0A452EC15	Serpin family A member 7 OS=Capra hircus OX=9925 GN=SERPINA7 PE=3 SV=1 - [A0A452EC15_CAPHI]	211.141	12.41	1	4	4	22	0.86926	22	16.3616	0.918564	22	10.5513	0.833593	22	13.3211	0.90069	22	15.4736	0.843671	22	10.9457	1.09445	22	9.17837	1.12417	22	4.5979	1.09302	22	8.02344	1.13709	22	7.96687	1.00071	22	6.15118	1.09444	22	10.8593	1.01653	22	4.2788	1.02512	22	5.15541	1.02973	22	7.49509
U6A087	Adiponectin OS=Capra hircus OX=9925 GN=AdipoQ PE=2 SV=1 - [U6A087_CAPHI]	200.194	17.57	7	2	2	11	1.03428	11	8.67828	0.975515	11	5.83883	0.989299	11	3.38969	0.953595	11	5.49625	1.02556	11	4.63868	0.954627	11	4.86817	0.976028	11	6.12555	0.953114	11	3.27458	0.950176	11	6.08148	1.02827	11	4.70489	0.935751	11	4.44997	1.07293	11	4.46905	1.02755	11	4.11732	1.10255	11	7.62844
A0A452FI89	Complement component C6 OS=Capra hircus OX=9925 GN=C6 PE=3 SV=1 - [A0A452FI89_CAPHI]	195.75	12.88	5	9	9	18	1.00625	18	9.42832	1.05366	18	9.14924	0.985594	18	8.62372	0.995477	18	6.99134	0.986457	18	6.98666	0.941989	18	8.71427	0.973052	18	10.1204	0.943401	18	6.77142	0.940973	18	8.38388	1.01974	18	7.00104	0.952397	18	9.2373	1.09552	18	4.79725	1.06763	18	7.3226	1.06178	17	7.51817
A0A452FZ76	Complement C1q A chain OS=Capra hircus OX=9925 GN=C1QA PE=4 SV=1 - [A0A452FZ76_CAPHI]	191.778	12.7	3	2	2	6	0.987652	6	9.86061	0.927845	6	9.08257	0.991029	6	6.69185	0.971799	6	9.55601	0.929798	6	1.8208	1.02438	6	3.41034	0.996977	6	7.31944	1.0022	6	3.54796	0.967005	6	6.39699	1.08735	6	3.8425	0.960906	6	12.3716	1.04357	6	2.23039	1.09596	6	3.65328	1.02387	6	8.19011
A0A8C2RSU4	Phosphatidylinositol-glycan-specific phospholipase D OS=Capra hircus OX=9925 PE=3 SV=1 - [A0A8C2RSU4_CAPHI]	184.565	6.06	10	4	4	8	1.01106	8	11.1966	0.972315	8	4.16409	1.03216	8	5.13341	0.934315	8	5.57449	0.991626	8	6.37373	0.962287	8	6.25797	1.01263	8	10.2722	0.91562	8	4.85515	1.00726	8	6.30446	1.03828	8	7.091	0.883123	8	5.50706	1.06148	8	4.04347	1.00491	8	9.1173	1.06778	8	3.9126
A0A452EES0	von Willebrand factor OS=Capra hircus OX=9925 GN=VWF PE=4 SV=1 - [A0A452EES0_CAPHI]	183.481	4.06	11	7	7	11	0.972778	11	9.99919	0.968178	11	1.47297	0.997795	11	8.35957	1.02678	11	9.44842	0.969939	11	11.7243	1.01459	11	6.92187	1.07144	11	5.32545	1.06464	11	6.43045	1.07371	11	11.2354	0.969606	11	11.6169	0.987548	11	7.57691	0.977273	11	11.0333	0.983932	11	3.0624	0.953939	11	5.97313
A0A452E432	Protein S OS=Capra hircus OX=9925 GN=PROS1 PE=4 SV=1 - [A0A452E432_CAPHI]	183.232	12.44	8	9	9	25	0.989364	25	9.7441	0.973745	25	8.1755	0.998757	25	11.5957	0.962637	25	8.3334	1.03901	25	9.01426	0.982324	25	6.06462	0.944739	25	4.93062	0.9868	25	9.5119	0.994011	25	6.34137	1.01587	25	7.66118	1.00058	25	8.28042	1.06346	25	5.14063	0.998908	25	6.40047	1.0299	25	7.69261
A0A8C2NY96	Attractin OS=Capra hircus OX=9925 PE=4 SV=1 - [A0A8C2NY96_CAPHI]	177.27	6.91	4	8	8	12	0.924306	12	8.15759	0.941288	12	8.80169	0.918397	12	8.83482	0.963467	12	6.98377	0.92352	12	7.52477	1.03992	12	7.12047	1.03124	12	4.54849	1.03547	12	6.57199	1.02558	12	4.24496	1.04764	12	2.34039	1.00781	12	7.83767	1.02893	12	5.00526	1.03969	12	5.82111	1.01111	12	7.09013
A0A452DPJ3	Ig-like domain-containing protein OS=Capra hircus OX=9925 PE=4 SV=1 - [A0A452DPJ3_CAPHI]	176.325	25.15	2	2	3	71	0.940615	12	17.5535	0.892521	12	10.4061	0.896396	12	8.63172	0.831741	12	10.7289	0.87578	12	10.8946	1.20048	12	16.5963	1.1729	12	11.276	1.2277	12	15.3371	1.15495	12	16.7318	0.93483	12	13.0368	1.2435	12	8.92945	0.926331	12	5.6011	0.953056	12	10.9603	0.933243	12	12.6963
A0A452FEC6	Receptor protein-tyrosine kinase OS=Capra hircus OX=9925 GN=EGFR PE=3 SV=1 - [A0A452FEC6_CAPHI]	167.408	4.22	9	4	4	7	0.973469	7	12.7086	1.0246	7	8.15853	1.03002	7	3.5269	1.02657	7	6.40281	0.997583	7	4.93661	0.981932	7	3.29507	0.968244	7	3.90925	0.968018	7	3.58977	1.01197	7	7.07102	0.990045	7	3.77895	1.00236	7	6.64001	1.00045	7	1.62672	1.002	7	7.24679	1.08675	7	2.22202
A0A452FVB9	Lipid-binding serum glycoprotein N-terminal domain-containing protein OS=Capra hircus OX=9925 PE=4 SV=1 - [A0A452FVB9_CAPHI]	167.23	4.47	1	2	2	13	0.899522	13	13.036	0.921549	13	11.6937	1.06296	13	19.4428	0.977826	13	17.8754	0.957114	13	9.42117	1.11023	13	8.20116	1.02873	13	16.5658	1.06245	13	12.3992	1.09609	13	9.82293	0.999459	13	14.9762	1.08862	13	11.0704	0.998428	13	16.4285	0.950708	13	17.9112	1.01553	13	14.5923
A0A8C2R3R0	Serpin domain-containing protein OS=Capra hircus OX=9925 PE=3 SV=1 - [A0A8C2R3R0_CAPHI]	163.663	12.21	2	3	5	20	1.02113	5	10.0067	1.00476	5	3.07747	0.943353	5	4.74687	1.01292	5	4.14755	1.02222	5	2.10675	1.05706	5	1.95805	1.05583	5	2.28485	0.995539	5	6.86246	1.09906	5	5.08319	0.976871	5	4.96395	1.02024	5	13.0076	0.956018	5	5.89985	0.988626	5	4.77365	0.983553	5	6.63304
A0A452FG11	Complement factor properdin OS=Capra hircus OX=9925 GN=CFP PE=4 SV=1 - [A0A452FG11_CAPHI]	162.763	14.25	3	6	6	13	0.907877	13	5.32965	0.926023	13	11.4682	0.923073	13	6.76086	0.973243	13	9.12847	0.911709	13	6.3641	1.06158	13	5.34612	1.08764	13	7.43394	1.03536	13	5.09943	1.07377	13	8.60933	0.987314	13	7.92112	1.06086	13	5.49507	1.02835	13	10.5558	1.03317	13	8.8857	1.05755	13	4.89224
A0A452FYY3	Apolipoprotein A-II OS=Capra hircus OX=9925 GN=APOA2 PE=3 SV=1 - [A0A452FYY3_CAPHI]	162.37	36	2	3	3	9	0.804823	9	85.3754	1.2433	9	25.6854	1.2392	9	33.5517	1.00903	9	43.0868	1.33595	9	15.2375	0.857078	9	25.4116	0.688152	9	57.3135	0.848239	9	37.0668	0.853693	9	20.402	1.01414	9	29.327	0.869604	9	20.6879	1.10259	9	28.4598	0.80706	9	47.8121	0.919262	9	50.6196
A0A8C2SDZ7	Lymphocyte cytosolic protein 1 OS=Capra hircus OX=9925 PE=4 SV=1 - [A0A8C2SDZ7_CAPHI]	158.57	12.33	6	5	5	12	0.963924	12	8.47792	0.9143	12	4.37378	0.939157	12	4.51591	0.923215	12	5.56191	0.908311	12	8.4099	0.988532	12	4.46409	1.02204	12	4.22646	0.97289	12	6.77649	1.0087	12	5.33776	1.11831	12	6.34089	0.994122	12	4.18603	1.03338	12	9.17051	1.07556	12	3.98717	1.0893	12	5.29006
A0A452DNI4	alpha-mannosidase OS=Capra hircus OX=9925 GN=MAN2B1 PE=3 SV=1 - [A0A452DNI4_CAPHI]	153.149	6.83	4	7	7	14	1.02386	14	8.98818	1.06783	14	6.50276	1.04697	14	10.3242	1.03046	14	6.35572	1.03187	14	6.06884	0.880442	14	11.2541	0.914685	14	11.3629	0.884284	14	9.80281	0.905167	14	12.1546	1.07491	14	6.37313	0.879644	14	14.3099	1.08167	14	7.30807	1.06016	14	6.76731	1.05516	14	4.97148
A0A452G0Q8	C1q domain-containing protein OS=Capra hircus OX=9925 GN=LOC102190762 PE=4 SV=1 - [A0A452G0Q8_CAPHI]	151.029	13.21	2	2	2	6	0.992093	6	7.15166	1.02929	6	9.6469	0.953403	6	3.71802	0.984287	6	6.00177	0.999869	6	3.17559	1.03652	6	6.56823	1.01552	6	4.37343	1.00774	6	4.61076	1.08216	6	3.78379	0.941826	6	6.79343	0.985338	6	6.87823	0.982548	6	5.53546	1.01243	6	1.36008	0.959125	6	6.9014
A0A452DTH7	Complement factor I OS=Capra hircus OX=9925 GN=CFI PE=4 SV=1 - [A0A452DTH7_CAPHI]	149.55	8.9	3	5	5	8	1.02613	8	5.24616	0.946218	8	5.53511	0.949428	8	4.02304	0.99763	8	6.617	0.987655	8	2.31516	0.985263	8	3.33492	1.01792	8	7.96596	0.983728	8	4.41261	0.991705	8	6.14603	1.02236	8	4.80566	1.04279	8	7.99837	0.974104	8	4.81472	1.01972	8	5.80681	1.05035	8	9.29965
A0A452EBC1	Complement C8 beta chain OS=Capra hircus OX=9925 GN=C8B PE=3 SV=1 - [A0A452EBC1_CAPHI]	147.27	12.6	11	5	5	6	0.997479	6	2.91813	0.977695	6	4.25248	0.993215	6	5.73559	1.0177	6	3.19927	1.03121	6	4.84526	1.0612	6	1.54508	1.03282	6	6.89243	1.08121	6	7.78037	1.10273	6	2.40879	0.992455	6	7.79606	1.10058	6	2.02247	0.92801	6	5.1638	0.957778	6	8.65244	0.88671	6	6.74768
A0A8C2RNH3	Apolipoprotein E OS=Capra hircus OX=9925 PE=3 SV=1 - [A0A8C2RNH3_CAPHI]	146.996	15.95	3	4	4	10	0.943889	10	13.8364	0.93374	10	4.32604	0.926055	10	5.75633	0.887522	10	4.92497	0.905266	10	4.6534	1.06298	10	3.46119	1.06978	10	3.18844	1.04875	10	5.87767	1.0828	10	8.85836	1.01972	10	7.98899	1.09786	10	5.91424	0.980673	10	5.93379	1.04234	10	6.66641	1.02498	10	4.94609
A0A452EPP3	Alpha-amylase OS=Capra hircus OX=9925 GN=LOC102169641 PE=3 SV=1 - [A0A452EPP3_CAPHI]	146.736	14.87	4	5	5	6	0.94837	6	4.92145	0.895893	6	8.25406	0.904136	6	8.31232	0.861828	6	3.08711	0.90285	6	1.64712	1.08414	6	10.2647	1.21365	6	12.2493	1.07772	6	7.22579	1.16156	6	10.7166	0.965211	6	5.73457	1.04841	6	4.46433	0.996322	6	6.67319	0.991229	6	9.8528	1.02889	6	10.4451
A0A452E6J5	Carboxypeptidase N subunit 2 OS=Capra hircus OX=9925 GN=CPN2 PE=4 SV=1 - [A0A452E6J5_CAPHI]	146.032	11.33	2	4	4	9	1.06801	9	16.6557	1.05353	9	6.58641	0.940551	9	13.8928	1.11809	9	10.4157	0.947623	9	13.5548	1.03027	9	14.3119	1.00454	9	1.59066	0.96705	9	4.97971	1.05963	9	9.27267	0.97733	9	12.5433	1.00927	9	6.43435	0.945234	9	8.07521	0.951465	9	8.00026	0.955391	9	13.2406
A0A452E724	Complement C1q C chain OS=Capra hircus OX=9925 GN=C1QC PE=4 SV=1 - [A0A452E724_CAPHI]	144.822	7.38	2	2	2	12	1.00508	12	13.0168	1.00124	12	5.77842	1.00196	12	3.0596	1.02054	12	9.02288	1.00167	12	4.5357	0.931954	12	7.559	0.983765	12	8.03316	0.952894	12	8.64217	0.95996	12	8.83445	1.02296	12	6.99961	0.945108	12	7.18174	1.02068	12	6.22253	1.04519	12	6.41414	1.04782	12	6.91907
A0A452FAN0	phosphopyruvate hydratase OS=Capra hircus OX=9925 GN=ENO3 PE=3 SV=1 - [A0A452FAN0_CAPHI]	141.079	4.61	13	1	2	9	1.5378	5	11.91	1.58337	5	18.6813	1.60226	5	10.9782	1.64489	5	22.8984	1.55167	5	9.93715	0.864634	5	11.0317	0.853946	5	6.83348	0.724525	5	28.5383	0.874434	5	1.71273	0.69969	5	16.8703	0.874239	5	2.11842	0.623658	5	25.484	0.635139	5	17.117	0.670794	5	10.2457
A0A8C2S562	VWFD domain-containing protein OS=Capra hircus OX=9925 PE=4 SV=1 - [A0A8C2S562_CAPHI]	138.27	9.49	6	2	10	12	0.975368	3	4.75721	1.03175	3	6.68348	0.929611	3	12.8017	0.993427	3	7.20202	0.988128	3	1.78903	0.939538	3	16.0213	0.914463	3	23.0152	0.974615	3	7.71249	0.983133	3	22.0212	1.07599	3	7.78427	0.925596	3	14.922	1.03165	3	7.77903	1.13471	3	23.4721	1.05873	3	8.11829
A0A452F2K7	Superoxide dismutase [Cu-Zn] OS=Capra hircus OX=9925 GN=SOD3 PE=3 SV=1 - [A0A452F2K7_CAPHI]	132.507	5.42	2	1	1	3	0.953523	3	3.6787	0.890533	3	2.37726	1.00865	3	3.89628	0.957985	3	2.24498	0.853897	3	4.25789	1.01018	3	0.0598543	0.993912	3	0.176591	0.994745	3	3.81663	0.964543	3	7.39165	1.06551	3	0.392816	0.961371	3	1.95118	1.06648	3	5.2339	1.04905	3	4.1015	1.07147	3	3.88521
A0A452G2Y4	Histidine rich glycoprotein OS=Capra hircus OX=9925 GN=HRG PE=4 SV=1 - [A0A452G2Y4_CAPHI]	131.23	12.43	2	9	9	17	0.860356	17	12.1099	0.843244	17	13.0427	0.833094	17	17.2979	0.881752	17	8.8588	0.838286	17	12.2618	1.20193	17	7.95539	1.19333	17	11.4168	1.1517	17	17.381	1.23376	17	13.4591	0.95945	17	7.49404	1.18016	17	13.8624	0.973867	17	8.88983	0.970722	17	6.06491	0.977578	17	9.77344
A0A8C2S718	VWFD domain-containing protein OS=Capra hircus OX=9925 PE=4 SV=1 - [A0A8C2S718_CAPHI]	129.07	6.97	5	1	9	10	0.860568	1		0.988701	1		0.857318	1		1.19137	1		0.978983	1		1.01401	1		1.10902	1		1.07043	1		0.874077	1		1.17939	1		0.936143	1		0.870855	1		1.19053	1		0.933305	1
A0A8C2R8K8	Peptidase D OS=Capra hircus OX=9925 PE=3 SV=1 - [A0A8C2R8K8_CAPHI]	126.074	15.51	4	4	4	8	0.94021	8	12.1365	0.99638	8	2.62526	1.00594	8	11.2983	1.02165	8	2.86567	0.92487	8	8.69564	0.948245	8	10.3366	0.98401	8	5.35098	0.938197	8	6.41609	0.930391	8	3.15342	1.10887	8	5.78477	0.959255	8	6.85396	1.1001	8	5.02312	1.03939	8	6.08412	1.0038	8	4.39139
A0A452FIS6	Glyceraldehyde 3-phosphate dehydrogenase NAD(P) binding domain-containing protein OS=Capra hircus OX=9925 GN=LOC102190753 PE=3 SV=1 - [A0A452FIS6_CAPHI]	124.7	20.98	4	1	6	11	1.31259	1		1.36785	1		1.28719	1		1.47664	1		1.333	1		0.838457	1		0.856658	1		0.871605	1		0.840012	1		0.751079	1		0.809007	1		0.883644	1		0.949	1		0.827499	1
A0A8C2RM04	Dipeptidase OS=Capra hircus OX=9925 GN=DPEP2 PE=3 SV=1 - [A0A8C2RM04_CAPHI]	124.279	5.78	3	2	2	3	1.02395	3	0.189976	1.0316	3	3.74792	1.05057	3	0.37322	1.02845	3	2.56483	0.957835	3	10.3872	0.906038	3	5.33419	0.932329	3	3.57953	0.921062	3	4.24567	0.950299	3	5.8044	1.02563	3	0.414373	0.963811	3	10.0181	0.991363	3	2.56572	1.08212	3	0.325848	1.00609	3	3.12723
A0A452DZA7	Ig-like domain-containing protein OS=Capra hircus OX=9925 PE=4 SV=1 - [A0A452DZA7_CAPHI]	123.552	13.91	1	1	2	62	0.473604	3	10.9055	0.714663	3	18.5156	0.78249	3	24.2603	0.702598	3	3.48757	0.737827	3	20.1801	1.69672	3	24.9263	0.803333	3	11.7929	1.60314	3	17.1031	0.833639	3	20.7208	1.35495	3	1.87955	1.54473	3	21.9812	1.16127	3	0.847553	0.734309	3	11.7192	0.68042	3	17.7711
A0A452EQL8	Pentraxin family member OS=Capra hircus OX=9925 GN=CRP PE=3 SV=1 - [A0A452EQL8_CAPHI]	121.801	26.24	4	7	7	18	1.05639	18	13.4751	1.06829	18	15.743	1.11823	18	16.2197	0.989904	18	19.3863	1.07718	18	16.922	0.977054	18	9.25457	0.971259	18	11.8652	0.96748	18	13.5715	1.00682	18	15.522	0.963455	18	6.70961	0.955505	18	11.6538	0.960843	18	10.3353	0.969289	18	13.5143	0.992818	18	13.921
A0A452DLP5	Sushi domain-containing protein OS=Capra hircus OX=9925 PE=4 SV=1 - [A0A452DLP5_CAPHI]	121.055	17.27	2	2	8	23	1.15902	4	1.98626	1.12795	4	5.32472	1.05992	4	3.05306	1.17589	4	5.99088	1.07701	4	5.38158	0.972476	4	17.0754	1.0629	4	4.4418	0.981437	4	4.38824	1.02016	4	8.27143	0.842412	4	5.31509	1.09861	4	2.46894	0.820718	4	16.3405	0.875232	4	9.70171	0.877234	4	9.49192
A0A452E7S5	Dickkopf WNT signaling pathway inhibitor 3 OS=Capra hircus OX=9925 GN=DKK3 PE=3 SV=1 - [A0A452E7S5_CAPHI]	116.307	6.59	2	1	1	4	1.1193	4	15.8007	0.981085	4	13.2168	1.05203	4	11.5044	0.998257	4	4.86895	1.05932	4	8.82419	0.887479	4	10.122	0.991883	4	12.7488	0.986636	4	13.5124	0.964777	4	7.08785	1.07152	4	3.8744	0.912891	4	9.86911	0.950115	4	4.60935	1.04456	4	4.67185	1.06004	4	4.64737
A0A452F2I2	Epoxide hydrolase OS=Capra hircus OX=9925 GN=EPHX1 PE=3 SV=1 - [A0A452F2I2_CAPHI]	115.887	6.87	6	2	2	7	0.911681	6	9.67914	0.895736	7	14.9828	0.954252	7	19.0064	0.884732	7	5.44162	0.974325	6	31.3899	1.03898	7	10.1294	1.04226	7	15.7347	1.03529	7	16.1162	0.961501	6	16.1388	1.16398	7	5.89203	1.09272	7	8.55118	1.10781	7	11.1765	1.09088	7	8.83667	1.11632	7	2.2924
A0A452E2P1	Ig-like domain-containing protein OS=Capra hircus OX=9925 PE=4 SV=1 - [A0A452E2P1_CAPHI]	112.81	11.71	1	2	2	6	0.917142	6	6.62238	0.866258	6	7.48647	0.957333	6	11.1441	0.950692	6	6.62696	0.98263	6	3.61646	1.07166	6	8.55882	1.1087	6	2.62684	1.02487	6	6.14331	1.0831	6	6.16397	0.992143	6	5.54093	1.00173	6	2.14584	0.952608	6	6.49973	1.00611	6	5.84462	1.05791	6	8.85723
A0A8C2SD32	LRRCT domain-containing protein OS=Capra hircus OX=9925 PE=4 SV=1 - [A0A8C2SD32_CAPHI]	110.31	8.89	1	2	2	6	0.97275	6	4.43058	1.01177	6	6.96759	1.00247	6	6.08126	1.00529	6	3.03124	0.993538	6	7.43299	1.01106	6	2.24824	1.0497	6	2.70283	1.07005	6	6.10958	0.971398	6	3.43357	1.01305	6	3.60495	0.963379	6	3.18549	0.979672	6	5.85693	0.980792	6	8.27435	1.03907	6	6.45818
A0A452FJ33	CD44 antigen OS=Capra hircus OX=9925 GN=CD44 PE=4 SV=1 - [A0A452FJ33_CAPHI]	106.985	5.92	7	2	2	7	1.10367	7	13.508	1.01324	7	1.92173	1.02096	7	6.35947	1.03976	7	5.06823	1.03529	7	7.56796	0.924502	7	10.0385	0.94084	7	9.13412	0.925431	7	7.16802	0.962229	7	7.99258	1.03096	7	9.90143	0.946172	7	8.24909	1.06184	7	4.31206	0.986546	7	5.62917	1.04995	7	6.21563
A0A452DY24	Thioredoxin domain-containing protein OS=Capra hircus OX=9925 GN=PRDX2 PE=3 SV=1 - [A0A452DY24_CAPHI]	106.367	34.34	3	4	4	7	0.961011	7	8.74016	0.970062	7	8.88302	0.940563	7	5.32347	0.940604	7	8.25374	0.949399	7	7.16175	1.1387	7	8.05747	1.15046	7	2.75977	1.16458	7	7.23388	1.18079	7	7.54822	0.913396	7	7.84304	1.14584	7	9.916	0.928586	7	4.42204	0.965145	7	3.47797	0.914956	7	3.28689
A0A8C2NBQ9	Biotinidase OS=Capra hircus OX=9925 PE=3 SV=1 - [A0A8C2NBQ9_CAPHI]	106.256	9.03	6	4	4	8	0.973379	8	4.23212	0.97538	8	13.674	1.01325	8	6.79675	0.985741	8	4.7595	1.02671	8	3.04408	0.949133	8	14.8822	0.93001	8	6.5057	0.96315	8	6.47384	0.965412	8	9.50396	1.05484	8	8.18776	0.993545	8	10.516	1.08779	8	4.22305	1.02832	8	11.1604	1.04861	8	4.46232
A0A452DUP5	Ornithine transcarbamylase, mitochondrial OS=Capra hircus OX=9925 GN=OTC PE=3 SV=1 - [A0A452DUP5_CAPHI]	102.944	5.05	2	1	1	2	0.953594	2	16.001	1.15754	2	2.60744	1.04389	2	3.27104	0.990296	2	7.55826	1.08289	2	1.85622	1.04068	2	0.758469	0.885945	2	15.4433	1.07324	2	10.4584	1.00874	2	6.06242	0.94721	2	14.6619	1.07993	2	11.5526	0.970482	2	10.3107	0.937495	2	5.21429	0.956379	2	5.99637
A0A452FTD0	Ig-like domain-containing protein OS=Capra hircus OX=9925 PE=4 SV=1 - [A0A452FTD0_CAPHI]	100.091	30.9	2	5	5	31	0.988051	31	8.92738	1.01185	31	9.42665	0.971679	31	8.18985	0.974572	31	10.1878	1.00027	31	10.9327	1.10744	31	5.28897	1.08931	31	8.3536	1.11942	31	7.12468	1.13761	31	6.15783	0.923001	31	7.65533	1.13751	31	4.21242	0.920032	31	9.88546	0.926984	31	6.96464	0.912967	31	5.50289
A0A452DSP2	Carboxypeptidase N subunit 1 OS=Capra hircus OX=9925 GN=CPN1 PE=3 SV=1 - [A0A452DSP2_CAPHI]	99.8712	10.82	1	3	3	4	0.96891	4	3.74166	0.996036	4	3.38045	0.974026	4	3.94737	1.00308	4	3.66905	0.956486	4	0.802952	1.00732	4	1.69432	1.06945	4	1.05822	0.972561	4	8.38052	1.01897	4	8.87583	0.95829	4	7.16423	1.00034	4	3.51624	1.00904	4	1.26501	1.02649	4	9.60232	1.00543	4	6.63454
A0A8C2QWC6	Insulin-like growth factor-binding protein 2 OS=Capra hircus OX=9925 PE=4 SV=1 - [A0A8C2QWC6_CAPHI]	99.502	14.4	6	3	3	4	0.84671	4	7.99923	0.887155	4	3.71765	0.834609	4	2.42654	0.933993	4	3.51906	0.867445	4	2.95693	0.913462	4	4.55041	0.921399	4	5.65121	0.862114	4	2.07902	0.919362	4	4.45718	1.19225	4	1.98078	0.884114	4	3.55555	1.15464	4	7.70023	1.24724	4	2.10166	1.23157	4	6.51054
A0A452DQP6	Actin alpha cardiac muscle 1 OS=Capra hircus OX=9925 GN=ACTC1 PE=3 SV=1 - [A0A452DQP6_CAPHI]	92.6888	20.86	23	1	6	13	1.10254	1		1.12204	1		1.0127	1		1.06099	1		1.02779	1		1.14721	1		1.13064	1		1.11686	1		1.07224	1		0.863259	1		1.04893	1		0.847935	1		0.836049	1		0.993417	1
A0A452F6K1	Vitamin K-dependent protein C OS=Capra hircus OX=9925 GN=PROC PE=4 SV=1 - [A0A452F6K1_CAPHI]	90.0877	10.92	4	4	4	8	0.914014	8	10.044	0.901723	8	6.14406	0.920269	8	9.90744	0.934649	8	4.68219	0.876202	8	4.35581	1.1038	8	3.33525	1.06541	8	1.76989	1.05179	8	5.91808	1.09665	8	4.95487	1.01117	8	3.21513	1.05082	8	4.16081	1.00398	8	8.52774	0.97648	8	7.31961	1.08712	8	5.34342
A0A8C2S6A2	Fructose-bisphosphate aldolase OS=Capra hircus OX=9925 GN=MRPL50 PE=3 SV=1 - [A0A8C2S6A2_CAPHI]	89.7876	13.98	8	4	4	5	1.01897	5	10.1729	1.0978	5	19.3942	1.09995	5	30.8931	1.20982	5	20.0087	1.06449	5	2.84022	1.11954	5	1.7016	1.02461	5	16.7071	0.926899	5	16.9292	1.02353	5	21.3555	1.04413	5	3.73519	0.967663	5	11.8063	0.899807	5	15.5	0.869745	5	11.7812	0.94678	5	16.8777
A0A452EXE1	NADP-dependent oxidoreductase domain-containing protein OS=Capra hircus OX=9925 GN=LOC102189495 PE=3 SV=1 - [A0A452EXE1_CAPHI]	89.3867	18.21	24	2	4	8	0.835535	5	19.5105	0.897259	5	2.71229	0.856227	5	24.447	0.956369	5	6.61819	0.93755	5	14.6736	1.03569	5	12.0661	1.07748	5	2.82371	1.08864	5	8.8666	1.08109	5	11.2778	1.11063	5	15.2563	1.06647	5	8.10925	1.01785	5	14.5335	1.07435	5	6.72339	0.94713	5	4.27888
A0A452E1G6	Ig-like domain-containing protein OS=Capra hircus OX=9925 GN=LOC102175177 PE=4 SV=1 - [A0A452E1G6_CAPHI]	88.0556	12.16	5	5	5	7	0.966361	7	11.0413	0.971623	7	13.241	1.01514	7	13.8388	1.01646	7	9.11935	1.00948	7	8.8749	1.00115	7	7.03241	0.932091	7	12.1286	0.942769	7	8.36284	0.987538	7	6.74427	1.06486	7	4.87574	0.961906	7	8.37381	1.02551	7	2.88294	1.01691	7	11.3574	1.09402	7	5.8975
A0A8C2PAE3	Triggering receptor expressed on myeloid cells like 1 OS=Capra hircus OX=9925 PE=4 SV=1 - [A0A8C2PAE3_CAPHI]	87.9375	5.53	3	1	1	2	0.970614	2	2.71635	0.996077	2	0.382647	0.977114	2	6.74438	0.950436	2	1.97748	1.01355	2	0.0909879	1.07662	2	2.57258	1.09805	2	4.14061	1.02747	2	11.7764	1.12753	2	0.13327	0.930158	2	10.3972	1.06799	2	6.58754	0.918865	2	5.37125	0.994586	2	10.2648	0.934185	2	9.09731
A0A452FGE5	Serpin family A member 6 OS=Capra hircus OX=9925 GN=SERPINA6 PE=3 SV=1 - [A0A452FGE5_CAPHI]	86.601	14.42	3	5	5	8	1.11129	8	7.67938	1.06963	8	6.48255	1.08359	8	5.08008	1.08448	8	9.50433	1.10701	8	12.1086	0.769904	8	29.5561	0.765224	8	29.206	0.71443	8	28.919	0.775355	8	35.6392	1.12034	8	15.6392	0.728692	8	37.5162	1.10526	8	13.6679	1.15305	8	11.2042	1.20224	8	10.3836
A0A452G0V9	FAM20C golgi associated secretory pathway kinase OS=Capra hircus OX=9925 GN=FAM20C PE=3 SV=1 - [A0A452G0V9_CAPHI]	84.6373	4.36	4	2	2	2	0.999471	2	7.88627	0.996419	2	21.1107	0.918973	2	2.77283	0.972792	2	9.73759	1.00053	2	3.70543	0.946313	2	11.9621	0.990305	2	5.11719	0.957127	2	5.38997	0.970008	2	9.70626	1.0105	2	1.86384	1.0053	2	6.73059	1.06889	2	4.87829	1.10262	2	5.63366	1.0601	2	5.89888
A0A452EMY5	Fibrinogen gamma chain OS=Capra hircus OX=9925 GN=FGG PE=4 SV=1 - [A0A452EMY5_CAPHI]	82.8405	21.78	4	6	6	9	1.01404	9	9.64724	1.09208	9	8.97356	1.06084	9	4.41147	1.09897	9	4.41379	1.01037	9	4.10646	1.15575	9	1.75896	1.19652	9	5.82297	1.11109	9	7.36121	1.13339	9	6.71423	0.783701	9	5.36436	1.1208	9	9.25246	0.75597	9	4.83485	0.831571	9	14.891	0.795383	9	11.9454
A0A452F7S5	Beta-2-microglobulin OS=Capra hircus OX=9925 GN=LOC102168547 PE=3 SV=1 - [A0A452F7S5_CAPHI]	82.4572	8.33	4	1	1	8	0.844786	8	3.60935	0.920344	8	7.14401	0.912685	8	5.54589	0.82419	8	11.5016	0.951518	8	9.15478	0.998861	8	6.64197	1.02834	8	6.15078	0.956344	8	6.61942	1.01029	8	5.38763	1.02069	8	5.85706	0.954335	8	9.71726	1.17147	8	6.80897	1.06638	8	3.45712	1.09244	8	10.217
A0A452EQV9	Cadherin 5 OS=Capra hircus OX=9925 GN=CDH5 PE=4 SV=1 - [A0A452EQV9_CAPHI]	82.2132	9.58	3	5	5	6	1.20835	6	2.6466	1.08998	6	5.62272	1.05652	6	2.69117	1.11397	6	6.75342	1.1169	6	12.8402	0.789535	6	6.22414	0.839366	6	6.67476	0.84052	6	5.1842	0.83552	6	13.0023	1.01532	6	7.70186	0.801869	6	7.80054	1.08564	6	3.00932	1.11174	6	5.39376	1.05669	6	4.14015
A0A452G6V4	NADP-dependent oxidoreductase domain-containing protein OS=Capra hircus OX=9925 GN=LOC102188841 PE=3 SV=1 - [A0A452G6V4_CAPHI]	80.6629	16.98	21	2	3	6	0.925318	5	19.6508	0.810425	5	18.4804	1.09576	5	3.56557	0.823781	5	16.9301	0.731776	5	55.1605	1.06164	5	9.21175	0.96032	5	2.87987	1.05008	5	4.86368	0.971293	5	15.9764	1.05026	5	12.1205	1.11044	5	15.6745	1.04058	5	17.7681	0.947535	5	5.16039	0.947132	5	11.9096
A0A8C2RYA0	Hydroxyacylglutathione hydrolase OS=Capra hircus OX=9925 GN=HAGH PE=4 SV=1 - [A0A8C2RYA0_CAPHI]	80.1431	3.3	2	2	2	3	1.0971	3	15.9803	1.06042	3	12.8137	1.00811	3	3.95751	1.01279	3	5.11281	1.01625	3	14.0696	0.8091	3	11.9849	0.95181	3	17.6619	0.849545	3	17.4756	0.971701	3	19.2653	1.02879	3	3.30253	1.0207	3	2.23652	1.01464	3	3.09322	0.98225	3	1.34434	1.09078	3	8.13466
A0A8C2RA57	Carbonic anhydrase OS=Capra hircus OX=9925 PE=3 SV=1 - [A0A8C2RA57_CAPHI]	79.1333	24.05	3	4	4	12	0.961544	12	3.28968	0.942717	12	6.82277	0.961077	12	5.90309	0.965477	12	5.995	0.937301	12	5.57208	1.07603	12	13.9873	1.13251	12	4.04663	1.08438	12	14.2569	1.16848	12	4.74869	0.934992	12	5.70459	1.12164	12	12.104	0.949223	12	8.69663	0.961214	12	8.14262	0.952598	12	7.55441
A0A8C2SM72	Coagulation factor XIII A chain OS=Capra hircus OX=9925 PE=3 SV=1 - [A0A8C2SM72_CAPHI]	78.8	4.89	4	2	2	2	0.963314	2	0.652746	1.02612	2	6.50739	1.20048	2	22.9756	1.00777	2	2.78704	1.06826	2	9.63287	1.05358	2	4.32388	1.02518	2	2.80341	0.995534	2	0.27492	1.01209	2	9.65757	0.999197	2	5.72544	0.973724	2	4.74639	0.976274	2	8.51215	0.935733	2	7.62754	0.934943	2	3.43548
A0A452F308	Glutathione peroxidase OS=Capra hircus OX=9925 GN=GPX1 PE=3 SV=1 - [A0A452F308_CAPHI]	77.9568	19.44	3	2	2	2	1.00395	2	10.8254	0.976344	2	7.3629	0.999865	2	3.59698	0.902781	2	16.103	0.975071	2	3.11418	1.07442	2	9.51918	1.12698	2	9.8417	1.14848	2	10.2367	1.1523	2	11.7684	0.950172	2	3.11562	1.15879	2	5.571	0.897677	2	9.85644	0.935274	2	3.42434	0.930396	2	2.87059
A0A8C2NVH5	receptor protein-tyrosine kinase OS=Capra hircus OX=9925 PE=3 SV=1 - [A0A8C2NVH5_CAPHI]	77.0396	2.91	4	2	2	4	1.10723	4	6.86141	1.09325	4	6.57911	0.988091	4	2.65198	1.10045	4	2.70801	1.03818	4	2.53495	1.03277	4	6.35513	0.98022	4	2.56255	0.951524	4	4.25681	0.971415	4	11.475	0.998293	4	1.05744	0.941445	4	4.3401	0.95159	4	4.32357	0.978136	4	6.02322	0.987554	4	4.42123
A0A8C2NI54	Mannan binding lectin serine peptidase 1 OS=Capra hircus OX=9925 GN=MASP1 PE=4 SV=1 - [A0A8C2NI54_CAPHI]	77.0182	7.56	7	3	3	5	0.930404	5	6.03727	0.990518	5	5.21191	0.954595	5	3.1215	0.976172	5	6.64987	0.938234	5	6.69853	0.98241	5	2.4251	0.980534	5	3.95434	1.0555	5	10.0023	1.04277	5	5.25872	1.00019	5	3.29056	1.06201	5	16.5735	1.05119	5	12.6374	1.04004	5	8.47829	1.00633	5	2.93297
A0A452F8G0	Cellular repressor of E1A stimulated genes 1 OS=Capra hircus OX=9925 GN=CREG1 PE=3 SV=1 - [A0A452F8G0_CAPHI]	76.7291	17.73	6	3	3	6	1.0807	6	3.67653	1.04152	6	8.40022	1.05655	6	7.48182	1.04785	6	10.4077	1.02295	6	0.992744	0.985469	6	9.22413	1.02309	6	5.36601	1.01653	6	9.69377	1.06695	6	7.12339	0.929554	6	4.58934	1.0082	6	8.62028	1.01521	6	6.08788	0.973864	6	7.85201	0.938622	6	8.53099
Q5FB29	Superoxide dismutase [Cu-Zn] OS=Capra hircus OX=9925 GN=SOD1 PE=2 SV=3 - [SODC_CAPHI]	76.6161	23.68	9	3	3	5	0.988521	5	4.01568	0.9631	5	6.17356	0.934972	5	7.44893	0.965404	5	4.93466	0.993078	5	4.49367	1.11129	5	8.47269	1.02884	5	1.27066	1.06847	5	2.82701	1.09663	5	6.71385	0.958797	5	4.12797	1.06366	5	6.68257	0.989342	5	6.65386	1.0085	5	7.72976	0.987733	5	5.78304
A0A452G3K3	Spleen trypsin inhibitor I OS=Capra hircus OX=9925 GN=LOC102177641 PE=4 SV=1 - [A0A452G3K3_CAPHI]	75.63	16.19	2	1	1	3	1.00353	3	7.64361	0.98429	3	0.845695	0.992471	3	3.60762	0.987876	3	3.31866	1.01824	3	0.691209	0.99832	3	4.94801	0.963039	3	4.40113	0.978481	3	5.89269	0.950584	3	10.7642	1.04671	3	6.86518	0.975516	3	4.31207	1.0732	3	9.0681	1.02365	3	0.758571	1.09318	3	2.88296
A0A8C2NVM2	Lipocalin/cytosolic fatty-acid binding domain-containing protein OS=Capra hircus OX=9925 PE=4 SV=1 - [A0A8C2NVM2_CAPHI]	72.4424	17.77	8	3	3	3	1.03656	3	6.96512	1.05652	3	0.313317	0.868282	3	4.8603	1.06272	3	2.73587	0.955188	3	2.44617	1.06785	3	2.83131	1.08741	3	0.762409	1.11582	3	25.4708	1.0988	3	1.07082	0.900408	3	2.86947	1.06517	3	9.62357	0.892481	3	0.093406	0.853467	3	3.1509	0.875999	3	25.1478
A0A8C2R4B2	Cytochrome P450 2E1 OS=Capra hircus OX=9925 PE=3 SV=1 - [A0A8C2R4B2_CAPHI]	71.34	4.88	2	1	1	1	0.763788	1		0.787679	1		1.02352	1		0.968568	1		0.862575	1		1.08292	1		1.07136	1		1.15501	1		1.06796	1		0.999484	1		1.25106	1		1.09649	1		0.907352	1		0.995541	1
A0A8C2Y498	C-type lectin domain containing 11A OS=Capra hircus OX=9925 PE=4 SV=1 - [A0A8C2Y498_CAPHI]	71.32	9.58	2	2	2	2	1.14208	2	41.4933	1.29955	2	34.0087	1.03807	2	15.485	1.19964	2	11.3828	1.08507	2	2.784	0.811539	2	34.5538	0.882634	2	18.3635	0.609087	2	85.303	0.795875	2	37.7603	1.06676	2	17.5885	0.79436	2	12.7172	0.938335	2	18.4677	0.955107	2	17.9101	1.18576	2	15.4879
A0A452E7J6	Monocyte differentiation antigen CD14 OS=Capra hircus OX=9925 GN=CD14 PE=4 SV=1 - [A0A452E7J6_CAPHI]	70.2419	13.67	5	2	2	3	1.03771	3	9.68135	1.1121	3	15.2444	1.00268	3	4.33987	1.04388	3	4.63603	0.966137	3	6.24545	0.907799	3	22.1903	0.861819	3	30.6428	0.865833	3	14.6029	0.909062	3	29.2866	0.993985	3	4.53783	0.884864	3	21.5521	0.942467	3	27.4253	1.03153	3	11.7787	1.15508	3	9.07148
A0A8C2RP21	Apolipoprotein C-IV OS=Capra hircus OX=9925 GN=APOC4 PE=3 SV=1 - [A0A8C2RP21_CAPHI]	68.2185	9.45	8	1	1	4	1.10688	4	7.65322	1.08066	4	8.60542	1.07739	4	16.397	1.05788	4	0.617096	1.03578	4	2.43306	0.936502	4	2.12902	0.88845	4	5.01343	0.877924	4	7.42829	0.934296	4	6.28523	0.982742	4	8.12316	0.867619	4	4.71925	1.04744	4	4.11188	0.980094	4	6.62841	1.06552	4	7.12223
A0A8C2QUC7	Cartilage oligomeric matrix protein OS=Capra hircus OX=9925 PE=3 SV=1 - [A0A8C2QUC7_CAPHI]	68.1836	2.8	4	1	1	2	1.24922	2	3.9846	1.07508	2	19.0338	1.17306	2	12.4105	1.17258	2	9.47628	1.11873	2	18.4566	0.819079	2	6.7684	0.893178	2	23.7117	0.862595	2	15.2317	0.936225	2	15.4256	0.971653	2	2.8311	0.832618	2	12.3666	0.941326	2	0.431703	1.03395	2	2.08561	1.02494	2	0.479223
A0A8C2QRB3	Apolipoprotein D OS=Capra hircus OX=9925 PE=3 SV=1 - [A0A8C2QRB3_CAPHI]	67.8827	12.56	6	3	3	9	0.803968	9	9.69387	0.809501	9	10.2423	0.852238	9	18.9523	0.752014	9	8.19952	0.825543	9	20.0116	1.27692	9	11.878	1.15885	9	14.3248	1.3245	9	15.72	1.20202	9	21.0834	0.99816	9	11.0272	1.22715	9	11.1038	0.990442	9	17.5636	0.929232	9	10.9347	0.906988	9	11.325
A0A8C2RW46	Mannan binding lectin serine peptidase 2 OS=Capra hircus OX=9925 PE=4 SV=1 - [A0A8C2RW46_CAPHI]	67.56	2.61	2	2	2	3	0.83207	3	2.93612	0.96221	3	0.875863	1.04649	3	12.7659	0.833611	3	7.22336	1.0148	3	14.2663	1.07082	3	2.20413	0.908696	3	27.5546	1.02019	3	7.81579	0.988126	3	9.59662	1.00696	3	2.19706	0.998234	3	7.76486	1.12419	3	3.58932	1.10127	3	0.764008	1.06408	3	0.531651
A0A8C2RP48	Phospholipid transfer protein OS=Capra hircus OX=9925 PE=3 SV=1 - [A0A8C2RP48_CAPHI]	66.7499	2.49	5	1	1	3	0.958837	3	9.53328	1.06626	3	4.59279	0.971522	3	9.20084	0.949332	3	0.999872	0.915292	3	1.16675	0.933699	3	0.204742	0.987599	3	2.27667	0.975105	3	2.22634	1.06104	3	0.269906	1.02161	3	2.2508	0.926502	3	0.13071	1.02562	3	3.1459	1.05634	3	5.84206	1.0843	3	6.28955
A0A452EIT8	Coagulation factor IX OS=Capra hircus OX=9925 GN=F9 PE=4 SV=1 - [A0A452EIT8_CAPHI]	66.5627	7.69	6	3	3	9	0.935996	9	3.51879	0.962579	9	6.71942	0.937428	9	7.42229	0.917189	9	7.66993	0.906107	9	5.07648	0.972322	9	7.99786	1.01402	9	6.21232	0.998586	9	4.54288	1.07135	9	3.5549	0.994604	9	5.99355	0.984619	9	5.25147	1.05749	9	4.96661	1.03126	9	3.65058	1.0905	9	5.09871
A0A452EM11	Apolipoprotein C-III OS=Capra hircus OX=9925 GN=APOC3 PE=3 SV=1 - [A0A452EM11_CAPHI]	64.4512	41.24	2	4	4	11	1.10583	11	11.0791	1.1449	11	10.7394	1.18035	11	10.3462	1.08433	11	10.0404	1.12003	11	11.6078	0.970783	11	5.43441	0.938043	11	14.4712	0.980508	11	10.0433	0.923548	11	14.3858	0.901344	11	5.65715	0.997243	11	12.2904	0.991	11	8.41165	0.926952	11	9.39189	0.941549	11	11.9997
A0A452F2G6	EH domain containing 3 OS=Capra hircus OX=9925 GN=EHD3 PE=4 SV=1 - [A0A452F2G6_CAPHI]	64.11	14.86	7	4	4	7	0.762028	5	9.17169	1.08533	5	28.3895	0.986239	5	19.6238	0.933251	5	28.3238	1.00437	5	36.6356	1.17472	5	9.57844	1.17068	5	7.12514	1.10192	5	7.74107	0.836196	5	56.3693	1.01531	5	37.8566	1.13416	5	19.0516	1.0045	5	18.6133	0.906405	5	19.909	0.915687	5	29.384
A0A452EE69	Ig-like domain-containing protein OS=Capra hircus OX=9925 PE=4 SV=1 - [A0A452EE69_CAPHI]	63.3572	16.03	1	1	1	7	0.930254	7	7.36261	1.03752	7	9.54313	0.986696	7	11.9127	0.978557	7	5.44954	1.02001	7	4.91484	1.11315	7	6.35367	1.02672	7	8.58567	1.03506	7	10.1821	1.07087	7	9.74433	0.955146	7	11.3437	0.969886	7	5.41193	0.955603	7	1.23622	1.06973	7	4.14244	1.0686	7	3.29526
A0A452ET82	Pyruvate kinase OS=Capra hircus OX=9925 GN=PKM PE=3 SV=1 - [A0A452ET82_CAPHI]	63.2491	9.42	2	3	5	7	1.2981	5	13.0862	1.21912	5	13.4976	1.34161	5	22.1964	1.37704	5	35.0824	1.30165	5	13.5706	0.957485	5	14.6073	0.985156	5	8.6382	0.987342	5	9.97152	1.00857	5	4.8501	0.688357	5	20.6282	0.870101	5	21.4216	0.649843	5	24.3344	0.788329	5	33.7613	0.984219	5	5.57564
A0A8C2RBN9	Kinesin motor domain-containing protein OS=Capra hircus OX=9925 PE=3 SV=1 - [A0A8C2RBN9_CAPHI]	61.6367	0.21	8	1	1	3	0.991983	3	6.10792	0.993478	3	6.80694	0.96118	3	10.0077	1.06067	3	13.194	0.993073	3	1.9471	0.955075	3	9.7967	0.914488	3	0.63386	0.975956	3	0.965024	0.992945	3	8.66498	1.03675	3	1.98624	0.939774	3	1.59372	1.0157	3	1.3572	1.04472	3	1.63974	1.14651	3	10.6117
A0A452EZ75	NADP-dependent oxidoreductase domain-containing protein OS=Capra hircus OX=9925 GN=LOC102176340 PE=3 SV=1 - [A0A452EZ75_CAPHI]	61.529	13.06	19	1	3	6	0.899174	2	11.0339	0.829465	3	7.6717	0.938367	3	0.792886	0.84983	3	3.1885	0.87464	3	1.3309	1.09075	3	0.817652	1.147	3	2.44402	1.09542	3	19.3358	1.18611	3	10.6173	1.15323	3	10.1926	1.09323	3	11.2523	1.05742	3	6.54372	1.0066	3	4.16146	1.00995	3	14.2706
A0A8C2PAU3	chitinase OS=Capra hircus OX=9925 PE=3 SV=1 - [A0A8C2PAU3_CAPHI]	61.12	8.16	2	3	3	4	0.928203	4	9.80536	0.943633	4	2.27738	0.881278	4	5.68534	0.919778	4	5.13081	0.916105	4	3.13491	0.954294	4	7.74378	1.00237	4	6.96166	0.960334	4	7.73757	0.959097	4	2.14007	1.0906	4	4.04115	0.984626	4	8.67102	1.04824	4	2.01876	1.14526	4	0.748055	1.09712	4	1.38926
A0A452F5B9	Galectin OS=Capra hircus OX=9925 GN=LOC102187672 PE=4 SV=1 - [A0A452F5B9_CAPHI]	61.03	5.41	8	1	1	2	0.987755	2	3.62824	0.952985	2	1.92375	0.933828	2	1.71361	1.03984	2	3.79754	0.979352	2	0.416771	1.08542	2	0.0554699	1.16063	2	2.83953	1.15255	2	1.98861	1.1884	2	2.81695	0.893272	2	2.0473	1.16537	2	0.379488	0.900999	2	3.26351	0.905904	2	4.5271	0.901571	2	0.428186
A0A8C2RMI4	Argininosuccinate lyase OS=Capra hircus OX=9925 GN=ASL PE=3 SV=1 - [A0A8C2RMI4_CAPHI]	60.2665	11.01	9	4	4	4	1.05641	4	3.72725	1.0238	4	4.42245	0.960076	4	1.14344	1.0051	4	4.03256	1.06389	4	7.74293	0.930628	4	6.87501	0.909398	4	8.82121	0.896259	4	3.06496	0.974796	4	7.14925	1.01733	4	3.51604	0.953196	4	2.71527	1.03367	4	1.83191	1.04377	4	3.58	1.03948	4	1.35243
A0A452EEY9	Neural cell adhesion molecule 1 OS=Capra hircus OX=9925 GN=NCAM1 PE=4 SV=1 - [A0A452EEY9_CAPHI]	59.92	3.69	9	1	4	4	0.95108	1		1.17095	1		1.13369	1		0.804111	1		1.10417	1		1.10853	1		0.887539	1		1.118	1		0.825019	1		1.04731	1		1.03483	1		1.12033	1		0.864564	1		0.976565	1
A0A452EW11	Complement C7 OS=Capra hircus OX=9925 GN=C7 PE=3 SV=1 - [A0A452EW11_CAPHI]	59.4914	4.45	2	3	3	4	1.04535	4	1.15505	1.00919	4	9.47428	1.03492	4	6.7064	1.06577	4	3.27335	0.986761	4	5.84982	1.02894	4	2.54533	1.09202	4	5.54088	1.00042	4	7.25832	1.03715	4	3.49252	0.922566	4	4.27997	0.977155	4	3.43279	0.927468	4	7.53714	0.979429	4	9.65495	0.993897	4	8.23326
A0A8C2S7U8	Vinculin OS=Capra hircus OX=9925 PE=3 SV=1 - [A0A8C2S7U8_CAPHI]	58.76	3.89	6	3	3	4	1.02644	4	0.389994	1.01853	4	5.6994	1.05239	4	10.0015	0.984654	4	3.24436	1.01926	4	5.34047	1.05745	4	1.35142	1.06227	4	5.19296	0.929131	4	8.67095	1.04639	4	4.09654	0.968469	4	7.13339	0.963216	4	6.3332	0.947883	4	3.30875	1.01565	4	2.10421	1.01314	4	5.01233
A0A452DRJ1	Coagulation factor XII OS=Capra hircus OX=9925 GN=F12 PE=4 SV=1 - [A0A452DRJ1_CAPHI]	57.9944	4.28	2	3	3	4	0.944017	4	1.52855	0.954395	4	8.15597	0.979444	4	8.08233	0.976758	4	4.38808	0.958607	4	2.78939	1.00972	4	3.29941	1.01124	4	7.90664	1.02358	4	1.48165	1.03053	4	9.80419	1.06711	4	5.21292	1.05519	4	3.78681	0.985894	4	3.97485	1.0059	4	7.96991	1.03894	4	1.04167
A0A8C2NV80	Tubulin alpha chain OS=Capra hircus OX=9925 PE=3 SV=1 - [A0A8C2NV80_CAPHI]	57.0147	6.71	21	2	2	3	1.04603	3	2.74409	0.976204	3	4.59448	0.976984	3	11.3808	0.995194	3	7.35193	0.988641	3	2.82468	1.17943	3	5.20901	1.04394	3	3.19753	1.14015	3	2.75254	1.14746	3	2.68124	0.969153	3	1.52648	1.15732	3	0.389725	0.84514	3	7.21374	0.862253	3	6.57319	0.914318	3	0.60017
A0A452FEG3	ADP-ribosyl cyclase/cyclic ADP-ribose hydrolase OS=Capra hircus OX=9925 GN=BST1 PE=3 SV=1 - [A0A452FEG3_CAPHI]	56.7896	12.75	4	2	2	2	0.995562	2	16.7176	1.18312	2	0.580243	1.08821	2	16.1968	1.04273	2	4.27807	1.01033	2	2.19251	1.06235	2	12.3618	1.0768	2	15.153	0.970547	2	8.37398	1.0074	2	5.07608	0.865448	2	1.45244	0.94185	2	0.345042	0.924873	2	14.3176	0.971682	2	0.580683	0.929096	2	3.68129
A0A8C2PE89	Dipeptidyl peptidase 1 OS=Capra hircus OX=9925 PE=3 SV=1 - [A0A8C2PE89_CAPHI]	56.4393	7.91	3	3	3	6	1.04483	6	2.59899	1.03334	6	2.07355	1.01578	6	5.3212	1.04808	6	1.12548	1.03631	6	3.39621	0.994242	6	1.56473	0.986438	6	1.98523	0.969703	6	2.4255	0.992674	6	3.5922	0.986121	6	4.53599	0.972434	6	6.21315	0.999249	6	5.25899	1.00317	6	2.64981	1.02118	6	5.13383
A0A452G6C7	Ig-like domain-containing protein OS=Capra hircus OX=9925 PE=4 SV=1 - [A0A452G6C7_CAPHI]	55.75	21.13	1	1	1	3	0.8898	3	36.1284	0.817262	3	12.602	0.841465	3	14.6112	0.899065	3	3.09749	0.649576	3	8.40237	1.01022	3	8.21729	0.976767	3	1.7671	0.995516	3	33.4342	1.03097	3	2.75091	1.07887	3	17.6259	0.937909	3	0.459675	1.19706	3	20.664	1.04594	3	1.11464	1.21963	3	8.78262
A0A452FNG5	Heat shock protein 90 alpha family class A member 1 OS=Capra hircus OX=9925 GN=HSP90AA1 PE=3 SV=1 - [A0A452FNG5_CAPHI]	55.5708	3	12	2	2	2	1.07745	2	19.7823	1.08075	2	9.26951	0.947083	2	25.8726	1.15425	2	15.5958	1.1562	2	6.42817	1.00277	2	0.391443	0.918236	2	10.0516	0.907075	2	5.33141	1.03685	2	7.05732	0.907466	2	3.34147	1.01154	2	10.7659	0.945681	2	12.3087	0.969562	2	19.241	0.944067	2	15.6317
A0A452FZ15	C1q domain-containing protein OS=Capra hircus OX=9925 GN=LOC102191021 PE=4 SV=1 - [A0A452FZ15_CAPHI]	55.4172	7.08	2	1	1	3	0.367469	3	22.2024	0.83764	3	3.88982	1.61626	3	11.403	0.546922	3	31.7366	1.32869	3	15.4096	1.27863	3	22.6297	0.748367	2	56.7155	1.48401	3	91.0921	0.594441	2	122.253	1.54363	3	4.87546	1.43322	3	73.8705	1.40603	3	22.6899	0.406757	3	1.10248	0.437989	3	17.2948
A0A8C2XY24	Calpain 1 OS=Capra hircus OX=9925 PE=3 SV=1 - [A0A8C2XY24_CAPHI]	54.72	2.51	5	1	1	1	0.91859	1		0.948493	1		0.966814	1		0.949506	1		0.932404	1		0.914852	1		0.951655	1		0.999329	1		0.994212	1		1.16228	1		1.05657	1		0.933074	1		1.11188	1		1.14522	1
A0A452ECU4	Complement C1s OS=Capra hircus OX=9925 GN=C1S PE=4 SV=1 - [A0A452ECU4_CAPHI]	54.1035	5.56	7	4	4	11	1.02379	10	9.51751	0.941593	10	11.3913	0.991306	10	15.2636	0.985776	10	6.59319	0.977107	10	9.23356	0.976361	10	3.99853	0.991311	10	6.87755	0.958276	10	8.16594	1.01983	10	11.1502	1.04113	10	4.67487	0.961151	10	5.9348	1.03573	10	7.99947	1.01389	10	10.314	1.03936	10	8.48783
A0A452ESZ1	Enoyl reductase (ER) domain-containing protein OS=Capra hircus OX=9925 GN=LOC102181105 PE=3 SV=1 - [A0A452ESZ1_CAPHI]	53.8089	21.92	3	4	4	10	1.01291	10	12.312	1.0158	10	17.296	1.06278	10	13.7863	0.981276	10	3.35462	1.03046	10	14.9772	0.904798	10	14.2016	0.878038	10	23.5616	0.947709	10	12.1768	0.964722	10	10.7033	1.14775	10	12.1195	0.934849	10	14.6582	1.05507	10	4.23282	1.04105	10	8.59098	1.05464	10	17.6686
M4NBE4	78 kDa glucose-regulated protein OS=Capra hircus OX=9925 GN=HSPA5 PE=2 SV=1 - [M4NBE4_CAPHI]	53.68	5.34	6	3	3	6	1.0109	6	4.4493	0.999567	6	4.15856	1.02203	6	4.52907	0.999312	6	6.30243	0.99223	6	6.4562	0.995419	6	8.69644	0.998867	6	3.42437	0.981657	6	8.17962	1.05343	6	4.01091	1.00679	6	5.87235	1.02605	6	6.7719	0.99386	6	2.47711	1.03805	6	4.64122	1.00457	6	3.18752
A0A452ED29	Polymeric immunoglobulin receptor OS=Capra hircus OX=9925 GN=PIGR PE=4 SV=1 - [A0A452ED29_CAPHI]	53.6	2.28	6	1	1	1	0.905866	1		0.922095	1		0.833403	1		0.89664	1		0.976986	1		1.02661	1		1.07812	1		1.07679	1		1.12567	1		1.05141	1		1.19582	1		1.07242	1		1.01082	1		0.956081	1
A0A452EAT2	Angiotensin-converting enzyme OS=Capra hircus OX=9925 GN=ACE PE=3 SV=1 - [A0A452EAT2_CAPHI]	52.2	1.45	1	1	1	1	0.879004	1		0.954491	1		0.996322	1		0.966685	1		0.919951	1		0.820578	1		0.985645	1		0.962325	1		0.985502	1		1.21836	1		0.866594	1		1.20122	1		1.02935	1		1.20797	1
A0A8C2XUN5	Multiple inositol-polyphosphate phosphatase 1 OS=Capra hircus OX=9925 GN=MINPP1 PE=4 SV=1 - [A0A8C2XUN5_CAPHI]	52.04	9.29	6	2	2	2	0.94451	2	6.17364	0.939584	2	5.97473	0.988951	2	11.0578	0.963666	2	30.7814	1.07515	2	34.9509	1.03316	2	14.8582	1.04098	2	1.04124	1.13212	2	0.933571	0.937997	2	16.8619	0.995205	2	5.66021	1.14996	2	6.49643	0.947551	2	16.9684	0.9744	2	3.93524	0.934259	2	7.99151
A0A8C2RCJ6	Sushi domain-containing protein OS=Capra hircus OX=9925 PE=4 SV=1 - [A0A8C2RCJ6_CAPHI]	51.3078	12.75	1	2	4	11	0.960192	5	23.8988	1.17686	5	17.4592	1.15034	5	7.6535	1.03417	5	16.1202	1.19885	5	15.0374	1.08265	5	15.6681	0.96304	5	13.1656	1.16275	5	21.5162	0.906856	5	31.2172	0.999437	5	17.4154	1.0889	5	21.0427	0.926705	5	16.9552	0.89119	5	17.3992	0.892416	5	9.13251
A0A452G534	Laminin subunit beta 1 OS=Capra hircus OX=9925 GN=LAMB1 PE=4 SV=1 - [A0A452G534_CAPHI]	51.17	0.67	2	1	1	1	1.05564	1		0.999839	1		1.08739	1		1.04734	1		1.00912	1		1.02469	1		1.01196	1		0.951008	1		0.979495	1		1.01442	1		1.00796	1		1.03126	1		1.00905	1		0.922857	1
A0A8C2PHG0	Tissue factor pathway inhibitor OS=Capra hircus OX=9925 PE=4 SV=1 - [A0A8C2PHG0_CAPHI]	50.62	5.82	2	1	1	1	0.970206	1		1.00883	1		1.05694	1		1.06771	1		1.00083	1		0.96913	1		1.02244	1		0.977645	1		0.952498	1		0.950422	1		1.02873	1		0.936932	1		1.10811	1		1.00936	1
A0A452E243	Sushi domain-containing protein OS=Capra hircus OX=9925 GN=LOC102169690 PE=4 SV=1 - [A0A452E243_CAPHI]	49.52	10.78	3	3	3	7	1.03484	7	5.35225	0.934289	7	1.9743	1.01791	7	5.43523	0.961225	7	8.15629	0.999141	7	1.46597	1.02867	7	4.96738	1.03265	7	5.75862	0.979927	7	4.75416	1.05626	7	3.75771	0.968232	7	2.4312	1.01458	7	2.9264	1.02407	7	3.44359	0.99848	7	3.15988	0.995979	7	3.10751
A0A452FHF7	Secreted phosphoprotein 24 OS=Capra hircus OX=9925 GN=SPP2 PE=3 SV=1 - [A0A452FHF7_CAPHI]	49.02	5.42	2	1	1	1	1.36398	1		1.13402	1		1.27378	1		1.07509	1		1.29839	1		0.903505	1		0.828489	1		0.853351	1		0.900204	1		0.979753	1		0.864298	1		0.949393	1		0.879722	1		0.870061	1
A0A452FQB9	Ig-like domain-containing protein OS=Capra hircus OX=9925 PE=4 SV=1 - [A0A452FQB9_CAPHI]	48.7552	5.66	4	2	2	3	0.685356	3	33.5373	0.668564	3	30.8848	0.619908	3	16.5984	0.722856	3	35.3941	0.679547	3	17.3384	0.929816	3	8.36246	0.970821	3	15.1704	0.947626	3	6.33203	0.917915	3	1.06832	1.42674	3	5.0821	0.949066	3	3.54039	1.28898	3	18.2109	1.30915	3	22.2012	1.30092	3	26.2913
A0A452FVM4	Tryptophan--tRNA ligase, cytoplasmic OS=Capra hircus OX=9925 GN=WARS1 PE=3 SV=1 - [A0A452FVM4_CAPHI]	48.67	3.32	1	1	1	2	1.02443	2	2.72602	0.914138	2	2.63316	0.953447	2	0.577695	1.04223	2	3.21304	0.990783	2	19.1058	1.06097	2	15.7496	1.03727	2	1.59406	1.09044	2	1.77946	0.859872	2	1.13666	1.10221	2	7.59073	0.990294	2	3.40022	0.994126	2	7.56198	0.844712	2	14.4972	1.08943	2	0.802051
A0A452EQ44	separase OS=Capra hircus OX=9925 GN=ESPL1 PE=4 SV=1 - [A0A452EQ44_CAPHI]	48.5793	0.29	1	1	1	10	0.982799	6	12.7699	1.02804	6	6.62991	1.15549	6	23.1727	1.05013	6	5.33332	1.01174	6	15.3898	0.932984	6	9.35454	0.952262	6	12.6672	0.892428	6	2.81038	0.969807	6	12.9474	1.01684	6	7.83653	0.839796	6	5.63457	1.13267	6	17.2362	1.09315	6	4.02743	0.996306	6	4.78605
A0A452G907	Fibronectin type-III domain-containing protein OS=Capra hircus OX=9925 GN=ABI3BP PE=4 SV=1 - [A0A452G907_CAPHI]	48.15	1.87	4	1	1	1	1.11547	1		1.14849	1		1.06121	1		1.03936	1		0.924853	1		0.911555	1		1.09123	1		1.03314	1		1.0374	1		0.880609	1		0.907316	1		0.92119	1		1.07029	1		0.973583	1
A0A452EU10	CD86 molecule OS=Capra hircus OX=9925 GN=CD86 PE=4 SV=1 - [A0A452EU10_CAPHI]	46.94	6.23	6	2	2	4	1.05803	4	6.94924	0.986069	4	3.90702	0.967648	4	3.3095	1.04088	4	0.845411	1.05243	4	5.22722	0.987378	4	3.40633	0.977368	4	4.30635	0.982459	4	4.12823	1.02964	4	8.56058	0.993625	4	1.75275	0.99889	4	6.74722	0.983227	4	5.48109	1.03101	4	5.18533	1.02946	4	3.10122
A0A452FZ73	creatine kinase OS=Capra hircus OX=9925 GN=CKM PE=3 SV=1 - [A0A452FZ73_CAPHI]	46.5143	17.85	5	5	6	14	1.92846	10	7.29991	1.98536	10	8.86249	1.8944	10	5.74709	1.92719	10	13.3777	1.88877	10	10.3359	0.765805	10	10.4988	0.7108	10	20.2705	0.721801	10	8.5878	0.728576	10	19.7747	0.459886	10	21.5676	0.686076	10	19.8181	0.435645	10	25.2062	0.461276	10	21.6817	0.484797	10	8.21401
A0A452FZ04	Beta-2-glycoprotein 1 OS=Capra hircus OX=9925 GN=APOH PE=4 SV=1 - [A0A452FZ04_CAPHI]	46.2877	13.91	3	3	3	5	1.06654	5	3.20994	1.10248	5	5.58171	1.12189	5	8.48162	1.07721	5	5.17673	1.02665	5	8.3495	0.987168	5	7.87383	0.996568	5	5.21617	1.09857	5	10.1597	0.997211	5	9.42034	0.972377	5	4.8441	1.04575	5	11.0643	0.853989	5	7.13388	0.872635	5	8.00622	0.885156	5	8.76765
A0A452DKP0	Glutamate dehydrogenase OS=Capra hircus OX=9925 GN=GLUD1 PE=3 SV=1 - [A0A452DKP0_CAPHI]	46.24	3.7	3	1	1	1	0.865477	1		0.892403	1		0.865813	1		0.953994	1		0.866165	1		1.0555	1		0.997478	1		1.05472	1		1.04512	1		1.11515	1		1.06584	1		1.09571	1		1.06012	1		1.02064	1
A0A8C2RA51	protein disulfide-isomerase OS=Capra hircus OX=9925 PE=3 SV=1 - [A0A8C2RA51_CAPHI]	46.05	5.22	3	1	1	1	0.764458	1		0.779277	1		0.737789	1		1.65506	1		0.809149	1		0.808882	1		0.912819	1		1.03782	1		0.958916	1		0.957046	1		1.06966	1		0.9798	1		1.54591	1		0.781937	1
A0A452DQJ9	Apolipoprotein M OS=Capra hircus OX=9925 GN=APOM PE=3 SV=1 - [A0A452DQJ9_CAPHI]	45.9907	21.28	5	3	3	8	0.972232	8	10.1669	0.95144	8	9.40719	0.960496	8	12.2876	0.905864	8	7.72234	0.895428	8	15.6554	1.13253	8	5.78078	1.07668	8	12.3413	1.03008	8	11.3589	1.06982	8	10.9289	0.994859	8	10.5676	0.971284	8	5.78353	0.959717	8	11.1531	1.00375	8	6.87579	0.993181	8	5.45718
A0A452DK32	Coagulation factor X OS=Capra hircus OX=9925 GN=F10 PE=4 SV=1 - [A0A452DK32_CAPHI]	45.8538	7.72	3	2	2	5	0.997566	5	15.3524	1.06838	5	6.76217	0.959392	5	10.0547	0.978107	5	5.30675	1.04617	5	4.37499	1.02128	5	4.73167	1.03561	5	9.47115	0.986584	5	1.43556	1.00678	5	4.56146	0.995943	5	2.24287	0.944548	5	5.12838	1.00615	5	6.94177	1.01945	5	5.73414	0.999199	5	6.71141
A0A452ETH6	Neuropilin OS=Capra hircus OX=9925 GN=NRP2 PE=3 SV=1 - [A0A452ETH6_CAPHI]	45.8279	4.55	7	3	3	3	1.05736	3	4.76422	0.933136	3	3.15029	1.09429	3	0.788986	1.04598	3	0.916508	1.06188	3	8.31216	1.04572	3	9.96832	0.88947	3	5.03493	0.881867	3	6.45784	0.957685	3	8.07455	1.03669	3	3.35642	0.905961	3	20.0645	1.04931	3	11.8029	1.01916	3	10.5387	1.00674	3	0.978459
A0A452G197	Carbamoyl-phosphate synthase 1 OS=Capra hircus OX=9925 GN=CPS1 PE=3 SV=1 - [A0A452G197_CAPHI]	45.55	2.64	2	2	2	3	0.730364	3	38.1094	0.56119	3	60.3134	0.936353	3	14.5773	0.830554	3	1.78631	0.977518	3	61.0088	1.10721	3	4.37577	1.0157	3	5.67005	1.29516	3	22.6121	0.76563	3	50.8312	0.984493	3	66.9669	0.764294	3	8.77436	1.42208	3	29.8968	1.1455	3	28.1397	1.50032	3	13.7924
A0A8C2XVS2	Glucose-6-phosphate isomerase OS=Capra hircus OX=9925 PE=3 SV=1 - [A0A8C2XVS2_CAPHI]	45.3185	4.51	11	2	2	2	1.15788	2	10.1436	1.13343	2	13.5135	1.10338	2	12.841	1.09953	2	5.00025	1.15959	2	17.4647	0.932391	2	15.5947	0.98875	2	5.69517	0.91142	2	4.53735	0.93867	2	20.9207	0.944536	2	9.84988	0.915531	2	13.4581	0.954465	2	2.37985	0.922142	2	0.816183	1.01106	2	0.679379
A0A452FSB2	Myosin IC OS=Capra hircus OX=9925 GN=MYO1C PE=3 SV=1 - [A0A452FSB2_CAPHI]	44.71	1.05	5	1	1	2	0.996583	2	7.3875	0.920781	2	6.96363	0.856227	2	4.97786	0.982615	2	10.2325	0.856888	2	12.7261	1.09564	2	1.52614	1.11861	2	7.96484	1.13018	2	7.87671	1.17501	2	1.41872	0.965763	2	6.00917	1.11416	2	8.34253	0.951294	2	3.58685	0.971879	2	19.8853	0.957495	2	14.3013
A0A8C2S7B0	Fructose-bisphosphate aldolase OS=Capra hircus OX=9925 GN=ALDOA PE=3 SV=1 - [A0A8C2S7B0_CAPHI]	44.4695	24.38	7	5	6	12	1.64811	10	46.6528	1.70119	10	30.76	1.56824	10	44.5909	1.69005	10	39.965	1.76542	10	30.6311	0.77344	10	17.4557	0.824683	10	19.7071	0.758574	10	23.7761	0.753873	10	15.494	0.651291	10	71.4487	0.715825	10	22.3468	0.604201	10	59.7893	0.628827	10	61.6924	0.6969	10	57.8452
A0A452FEE2	Ig-like domain-containing protein OS=Capra hircus OX=9925 PE=4 SV=1 - [A0A452FEE2_CAPHI]	44.34	10.42	1	1	1	3	0.837236	3	5.34588	0.857292	3	7.34038	0.714791	3	23.6214	0.752055	3	0.32165	0.743527	3	3.54315	0.927115	3	2.01558	0.903599	3	3.06445	1.07096	3	1.05277	0.946891	3	15.968	1.1633	3	4.50111	1.01265	3	2.49292	1.25739	3	3.17117	1.17232	3	13.6869	1.294	3	8.30516
A0A452FTY4	Serum amyloid A protein OS=Capra hircus OX=9925 GN=SAA4 PE=3 SV=1 - [A0A452FTY4_CAPHI]	43.5878	22.31	2	3	3	4	0.820108	4	7.9885	0.761842	4	2.95203	0.712468	4	12.2846	0.784943	4	2.61229	0.778401	4	5.25758	1.46408	4	4.31025	1.44901	4	1.30442	1.46886	4	6.43024	1.40701	4	15.2546	0.746979	4	7.91708	1.47241	4	10.0331	0.788839	4	11.1035	0.844547	4	6.51593	0.834814	4	19.0108
A0A452ET55	Triosephosphate isomerase OS=Capra hircus OX=9925 GN=TPI1 PE=3 SV=1 - [A0A452ET55_CAPHI]	42.96	9.15	3	2	2	2	1.43818	2	52.4366	1.42051	2	49.0529	1.2584	2	44.5105	1.37161	2	50.3638	1.32221	2	37.3688	0.837197	2	30.5493	0.845972	2	25.5265	0.813914	2	45.4172	0.866982	2	39.5863	0.758011	2	26.1656	0.833997	2	29.301	0.716871	2	46.032	0.780844	2	26.8738	0.748013	2	38.9431
A0A452FT33	Aldehyde dehydrogenase 2 family member OS=Capra hircus OX=9925 GN=ALDH2 PE=3 SV=1 - [A0A452FT33_CAPHI]	42.72	5.21	5	1	1	1	0.671399	1		0.852151	1		0.869851	1		0.794867	1		0.77942	1		1.32452	1		0.789406	1		1.21172	1		1.11115	1		1.37454	1		0.942811	1		1.15849	1		0.971748	1		1.07622	1
A0A452DPP0	Ig-like domain-containing protein OS=Capra hircus OX=9925 PE=4 SV=1 - [A0A452DPP0_CAPHI]	42.6133	43.59	1	1	3	11	1.00063	4	15.0775	1.14505	4	3.89869	1.17192	4	10.6403	1.01866	4	31.7547	1.05618	4	2.49456	0.988132	4	17.6269	1.07732	4	22.2088	1.02016	4	18.4922	0.909398	4	5.26712	0.959907	4	7.83082	1.01051	4	4.91786	1.01403	4	7.39395	0.969184	4	3.29127	0.959723	4	14.0554
A0A452E7G1	Filamin A OS=Capra hircus OX=9925 GN=FLNA PE=3 SV=1 - [A0A452E7G1_CAPHI]	41.72	0.99	15	1	2	2	1.12925	1		0.934032	1		1.07788	1		0.913906	1		0.958253	1		0.920927	1		1.3689	1		1.11317	1		1.19298	1		0.892069	1		1.19815	1		0.793781	1		0.856995	1		0.997366	1
A0A8C2PBT0	Peptidase A1 domain-containing protein OS=Capra hircus OX=9925 PE=3 SV=1 - [A0A8C2PBT0_CAPHI]	41.4882	3.13	8	1	1	2	1.08366	2	11.151	0.959909	2	6.12959	0.989197	2	10.9505	1.05135	2	1.32044	1.14115	2	1.79019	1.088	2	6.59557	1.02097	2	3.02642	0.908	2	1.0951	0.968739	2	3.65475	0.991694	2	0.667262	1.00662	2	17.5468	0.896839	2	7.64667	1.07321	2	9.07766	0.885025	2	5.30403
G3ETQ9	HSP70.1 (Fragment) OS=Capra hircus OX=9925 PE=2 SV=1 - [G3ETQ9_CAPHI]	41.32	32.26	5	1	1	1	0.949995	1		0.969256	1		0.897474	1		1.00027	1		0.85885	1		1.0416	1		1.12298	1		0.986316	1		1.17898	1		0.900478	1		1.16675	1		1.05068	1		1.06558	1		0.99248	1
A0A8C2QZG6	Peptidylglycine alpha-amidating monooxygenase OS=Capra hircus OX=9925 PE=3 SV=1 - [A0A8C2QZG6_CAPHI]	41.22	1.98	11	1	1	1	1.03287	1		1.01569	1		1.10036	1		1.04803	1		0.955133	1		0.92412	1		0.885331	1		0.962548	1		0.926562	1		1.1288	1		0.906358	1		1.00332	1		1.00855	1		1.10444	1
A0A8C2SAZ8	Microtubule associated protein RP/EB family member 2 OS=Capra hircus OX=9925 PE=3 SV=1 - [A0A8C2SAZ8_CAPHI]	40.94	7.33	9	1	1	1	1.0168	1		1.15282	1		1.00303	1		0.908775	1		0.94891	1		1.14282	1		1.13082	1		1.10693	1		1.21045	1		0.841774	1		1.14431	1		0.912253	1		0.820619	1		0.829614	1
A0A452E4Q7	Ig-like domain-containing protein OS=Capra hircus OX=9925 PE=4 SV=1 - [A0A452E4Q7_CAPHI]	40.9182	37.37	2	1	2	8	1.00287	4	3.39661	0.972527	4	11.7325	0.972429	4	3.82667	1.0167	4	29.4671	1.02671	4	18.8226	0.941097	4	17.8309	0.906894	4	19.9986	0.875776	4	23.1422	1.0282	4	30.4323	1.06794	4	10.1189	0.966592	4	13.0078	1.07398	4	5.71415	1.02753	4	18.1527	1.12864	4	4.42096
A0A8C2QQY4	Platelet-derived growth factor receptor beta OS=Capra hircus OX=9925 GN=PDGFRB PE=3 SV=1 - [A0A8C2QQY4_CAPHI]	40.84	1.5	7	1	1	1	1.1332	1		1.11008	1		1.10861	1		1.03381	1		1.22942	1		0.797821	1		0.795382	1		0.805699	1		0.754711	1		1.01595	1		0.795412	1		1.16424	1		1.0254	1		1.1174	1
A0A8C2NHD1	Heat shock protein 90 beta family member 1 OS=Capra hircus OX=9925 GN=HSP90B1 PE=3 SV=1 - [A0A8C2NHD1_CAPHI]	40.67	3.07	9	2	2	2	1.00917	2	9.34448	1.03968	2	3.32335	1.05505	2	7.05355	0.998745	2	0.675774	1.00158	2	5.20076	0.985078	2	5.51024	1.04121	2	3.22672	1.01262	2	3.85785	1.02976	2	2.09692	0.986052	2	0.470511	0.997913	2	0.978703	0.966263	2	1.45508	1.01228	2	2.51922	1.01171	2	2.75713
A0A8C2R0G9	Insulin like growth factor 2 receptor OS=Capra hircus OX=9925 PE=4 SV=1 - [A0A8C2R0G9_CAPHI]	40.58	1.44	11	3	3	3	1.02077	3	6.79491	1.00898	3	1.55789	0.996157	3	14.9628	1.02508	3	3.07865	1.01079	3	1.15227	0.832486	3	11.329	0.84458	3	8.50289	0.841279	3	4.83475	0.833293	3	0.765932	1.09213	3	4.99342	0.815833	3	9.67617	1.14559	3	15.9304	1.02463	3	14.7593	1.15576	3	13.7246
A0A452FHL8	Propionyl-CoA carboxylase subunit beta OS=Capra hircus OX=9925 GN=PCCB PE=4 SV=1 - [A0A452FHL8_CAPHI]	40.15	2.77	5	1	1	1	1.05858	1		1.11071	1		0.95069	1		1.10661	1		1.03437	1		0.966681	1		0.927336	1		1.00276	1		1.04969	1		1.00475	1		1.01416	1		1.01332	1		0.920315	1		0.948376	1
A0A8C2RPC0	Cytochrome b5 OS=Capra hircus OX=9925 GN=CYB5A PE=3 SV=1 - [A0A8C2RPC0_CAPHI]	40.01	12.24	5	1	1	1	1.03984	1		0.95957	1		0.897968	1		1.12617	1		0.936305	1		0.944509	1		0.961925	1		0.943674	1		1.04334	1		1.09233	1		0.971889	1		1.0934	1		1.02233	1		0.956975	1
A0A8C2QQX6	Hydroxymethylglutaryl-CoA synthase OS=Capra hircus OX=9925 PE=3 SV=1 - [A0A8C2QQX6_CAPHI]	39.98	5.36	5	1	1	1	1.21978	1		1.1329	1		1.02139	1		1.12174	1		1.31509	1		1.10143	1		0.943551	1		0.881241	1		0.691095	1		1.18704	1		0.787427	1		0.958432	1		0.952382	1		0.905729	1
A0A8C2R9A6	Haloacid dehalogenase like hydrolase domain containing 2 OS=Capra hircus OX=9925 PE=4 SV=1 - [A0A8C2R9A6_CAPHI]	38.3	5.39	2	1	1	1	1.01694	1		1.01994	1		0.931851	1		1.01331	1		1.10123	1		1.14227	1		0.996714	1		0.986623	1		0.981783	1		0.882534	1		0.89221	1		1.08293	1		1.09678	1		1.05735	1
A0A452FHI6	4a-hydroxytetrahydrobiopterin dehydratase OS=Capra hircus OX=9925 GN=PCBD1 PE=3 SV=1 - [A0A452FHI6_CAPHI]	38.15	12.62	4	1	1	2	1.08322	2	18.5765	1.09306	2	15.93	1.16809	2	3.95234	1.08126	2	5.30343	1.0513	2	8.57637	0.968995	2	12.3999	0.904788	2	3.92295	0.878715	2	12.0819	0.879167	2	13.3253	1.04459	2	7.13165	0.998028	2	7.43937	1.03476	2	17.7588	1.00786	2	2.09743	0.956111	2	4.45725
A0A8C2SBK2	Advanced glycosylation end-product specific receptor OS=Capra hircus OX=9925 PE=4 SV=1 - [A0A8C2SBK2_CAPHI]	37.93	2.93	1	1	1	1	0.757144	1		0.991994	1		0.958709	1		0.917324	1		0.979519	1		1.13751	1		1.0371	1		1.1125	1		1.16442	1		0.964638	1		1.07798	1		0.932941	1		1.03163	1		1.01367	1
A0A8C2RJK4	phosphopyruvate hydratase OS=Capra hircus OX=9925 PE=3 SV=1 - [A0A8C2RJK4_CAPHI]	37.76	3.86	9	1	2	5	0.986493	1		0.983424	1		0.970964	1		0.995055	1		0.932242	1		1.06088	1		0.974126	1		1.11782	1		1.08687	1		0.948254	1		1.13603	1		0.99424	1		0.994904	1		0.969963	1
A0A8C2P6Q9	Aldehyde dehydrogenase 1 family member A1 OS=Capra hircus OX=9925 PE=3 SV=1 - [A0A8C2P6Q9_CAPHI]	37.27	7.61	13	2	2	2	0.914316	2	12.2353	0.921123	2	13.5825	0.965368	2	7.85042	0.88052	2	9.97319	0.974615	2	4.7952	1.08255	2	3.47867	0.998355	2	7.10386	1.11313	2	9.52835	1.16989	2	17.5162	1.10476	2	16.1404	0.991939	2	4.93517	0.966561	2	5.99316	1.02254	2	2.0065	0.987195	2	4.98287
A0A452DL28	Coagulation factor VII OS=Capra hircus OX=9925 GN=F7 PE=4 SV=1 - [A0A452DL28_CAPHI]	36.99	2.01	1	1	1	2	0.896617	2	10.0337	1.08963	2	5.5243	1.08195	2	11.8451	0.90045	2	3.5855	1.15506	2	13.8791	1.08706	2	0.951701	0.898784	2	11.5495	1.15416	2	2.49849	0.903695	2	14.5143	1.14656	2	8.37767	1.11952	2	1.62989	1.12002	2	11.6666	0.848328	2	11.5874	0.840273	2	10.4036
A0A452FZ55	phosphoenolpyruvate carboxykinase (GTP) OS=Capra hircus OX=9925 GN=PCK2 PE=3 SV=1 - [A0A452FZ55_CAPHI]	36.9	1.72	2	1	1	1	1.07045	1		0.981028	1		1.08342	1		0.98991	1		0.965977	1		0.889669	1		1.00352	1		1.07708	1		1.03275	1		0.990318	1		0.979299	1		0.980708	1		1.00406	1		1.06203	1
A0A452F410	Ig-like domain-containing protein OS=Capra hircus OX=9925 GN=LOC108633505 PE=3 SV=1 - [A0A452F410_CAPHI]	36.41	4.91	7	1	1	1	1.20023	1		1.09781	1		1.08286	1		1.11166	1		1.06517	1		0.912922	1		1.03895	1		1.00661	1		0.966655	1		0.999604	1		0.933631	1		0.90226	1		0.979988	1		0.905244	1
A0A452E132	Phosphoglycerate kinase OS=Capra hircus OX=9925 GN=PGK1 PE=3 SV=1 - [A0A452E132_CAPHI]	35.9887	10.36	4	3	3	5	1.94944	5	7.8672	1.92659	5	7.7806	1.97219	5	7.94421	2.03959	5	6.13923	1.96299	5	4.30453	0.665482	5	1.67231	0.739454	5	18.6295	0.639016	5	14.1373	0.644406	5	8.80966	0.530402	5	29.0854	0.621254	5	5.31915	0.497508	5	27.924	0.461835	5	19.129	0.490375	5	14.1273
A0A8C2NA33	Cyclase associated actin cytoskeleton regulatory protein 1 OS=Capra hircus OX=9925 PE=3 SV=1 - [A0A8C2NA33_CAPHI]	35.82	1.62	7	1	1	1	1.0405	1		0.94877	1		0.900224	1		1.03127	1		0.997281	1		1.00553	1		1.06674	1		1.22216	1		1.05899	1		0.947943	1		1.10696	1		1.09591	1		0.886376	1		0.809069	1
A0A8C2PC81	GLI pathogenesis related 2 OS=Capra hircus OX=9925 PE=4 SV=1 - [A0A8C2PC81_CAPHI]	35.64	9.52	4	1	1	1	1.02362	1		1.0732	1		0.944002	1		1.12562	1		1.05944	1		1.19164	1		0.844314	1		1.12626	1		1.04771	1		0.876819	1		0.91125	1		0.94301	1		0.978863	1		0.940897	1
A0A8C2RLH5	Ig-like domain-containing protein OS=Capra hircus OX=9925 PE=4 SV=1 - [A0A8C2RLH5_CAPHI]	35.51	5.56	1	1	1	6	0.986103	6	7.15087	0.951507	6	6.82095	0.960941	6	5.01594	0.966328	6	4.22696	1.02124	6	6.54075	0.825501	6	2.36298	0.848214	6	2.0524	0.82516	6	1.93977	0.855672	6	1.37994	1.17158	6	1.45472	0.831171	6	4.05956	1.17035	6	6.2503	1.19357	6	3.23553	1.19827	6	2.24607
A0A8C2S5B7	Cell adhesion molecule L1 like OS=Capra hircus OX=9925 PE=3 SV=1 - [A0A8C2S5B7_CAPHI]	35.44	5.73	13	2	2	2	1.0249	2	9.88005	1.04811	2	4.13595	1.18843	2	27.7398	1.10927	2	14.1582	1.0962	2	20.5542	0.884852	2	0.733173	0.805615	2	38.671	0.951103	2	2.10023	0.837438	2	29.325	1.06328	2	25.6311	0.843203	2	11.4196	1.07976	2	7.99101	1.05691	2	6.25104	0.968365	2	11.6255
A0A8C2S708	FYVE, RhoGEF and PH domain containing 2 OS=Capra hircus OX=9925 PE=4 SV=1 - [A0A8C2S708_CAPHI]	35.09	1.18	4	1	1	2	0.669779	2	86.3203	0.993855	2	35.9335	1.0241	2	42.8633	0.729263	2	60.4008	1.00179	2	42.182	1.23733	2	38.2775	0.792573	2	73.7122	1.2415	2	40.0638	0.852932	2	66.7338	1.11031	2	45.0588	1.18611	2	44.3057	1.14855	2	45.3465	0.737025	2	80.2428	0.725392	2	76.7512
A0A452EWV5	Suprabasin OS=Capra hircus OX=9925 GN=SBSN PE=4 SV=1 - [A0A452EWV5_CAPHI]	33.97	9.74	1	1	1	1	1.24006	1		1.40242	1		1.34985	1		1.27572	1		1.33242	1		1.00194	1		0.974929	1		0.861784	1		0.907977	1		0.822827	1		0.90314	1		0.777243	1		0.820803	1		0.842998	1
A0A452FLY3	Fatty acid-binding protein, intestinal OS=Capra hircus OX=9925 GN=FABP2 PE=3 SV=1 - [A0A452FLY3_CAPHI]	33.87	6.06	3	1	1	1	1.0713	1		1.00203	1		1.06961	1		1.07881	1		1.08838	1		0.850682	1		0.903724	1		0.788778	1		0.831536	1		1.08674	1		0.806774	1		1.10969	1		1.13053	1		1.10133	1
A0A8C2N992	Cathepsin S OS=Capra hircus OX=9925 PE=3 SV=1 - [A0A8C2N992_CAPHI]	33.55	6.05	4	1	1	1	0.935904	1		0.919078	1		0.902905	1		0.924987	1		0.90512	1		1.0203	1		1.01696	1		1.05403	1		1.13315	1		1.03498	1		0.981083	1		1.03545	1		1.066	1		1.09296	1
A0A8C2RFR3	Fibrinogen beta chain OS=Capra hircus OX=9925 GN=FGB PE=4 SV=1 - [A0A8C2RFR3_CAPHI]	33.44	6.86	5	1	1	2	1.39404	2	0.966433	1.24381	2	5.02168	1.2807	2	9.59271	1.37848	2	13.5344	1.25353	2	6.51285	0.994584	2	4.28835	1.04871	2	6.13701	1.01494	2	5.18667	1.008	2	9.53224	0.697856	2	0.720326	0.98784	2	2.48517	0.714701	2	14.4399	0.761426	2	3.47019	0.726815	2	6.28512
A0A8C2XWU7	EGF containing fibulin extracellular matrix protein 1 OS=Capra hircus OX=9925 PE=4 SV=1 - [A0A8C2XWU7_CAPHI]	33.38	1.8	3	1	1	2	1.06848	2	1.1719	1.1414	2	0.840497	1.03783	2	1.26129	1.05592	2	3.7921	1.14972	2	2.14855	0.997095	2	2.15327	0.924297	2	1.63811	0.966874	2	4.29111	0.882099	2	1.27572	1.00196	2	1.66557	0.971775	2	0.619154	1.05729	2	3.21216	0.969379	2	2.75353	0.939439	2	0.917715
A0A8C2R1Z9	Involucrin OS=Capra hircus OX=9925 PE=4 SV=1 - [A0A8C2R1Z9_CAPHI]	32.99	5.96	5	2	2	2	1.09364	2	3.28634	1.05952	2	6.16288	1.0865	2	0.892843	1.10464	2	0.154105	1.10192	2	7.98081	0.942924	2	11.7361	0.975957	2	12.6021	0.927476	2	4.50908	0.893264	2	11.7205	0.990779	2	6.30643	0.912787	2	3.6892	0.986614	2	18.6498	0.962799	2	12.894	1.02118	2	14.9307
A0A452DZ43	Fructose-bisphosphate aldolase OS=Capra hircus OX=9925 GN=ALDOC PE=3 SV=1 - [A0A452DZ43_CAPHI]	32.921	11.54	2	1	2	4	1.13902	2	2.18892	0.943991	2	14.8323	1.14279	2	1.63951	1.10347	2	18.769	1.0704	2	1.46395	0.956346	2	9.50345	1.02894	2	7.37406	0.963164	2	7.40271	1.05205	2	5.90565	0.962048	2	10.6537	1.03121	2	9.59954	0.882325	2	3.04622	0.880146	2	3.97483	0.963481	2	12.8108
A0A8C2Y4R2	Proteoglycan 4 OS=Capra hircus OX=9925 PE=4 SV=1 - [A0A8C2Y4R2_CAPHI]	32.84	7.74	7	6	7	10	1.12457	7	3.4837	1.12024	7	10.585	1.11369	7	9.51231	1.18469	7	5.41827	1.17241	7	9.27023	0.908014	7	2.11067	0.942474	7	4.00402	0.884589	7	10.1164	0.928376	7	2.58986	0.942411	7	6.96377	0.879906	7	10.4072	0.962732	7	8.02518	0.997024	7	7.48767	0.975649	7	6.80147
A0A8C2P8Y9	Neural cell adhesion molecule 1 OS=Capra hircus OX=9925 PE=4 SV=1 - [A0A8C2P8Y9_CAPHI]	32.77	6.77	12	2	5	5	1.06782	2	11.1457	1.02426	2	7.8967	1.02136	2	1.6168	1.01337	2	7.21139	0.949368	2	3.86137	0.979758	2	2.30314	0.989347	2	8.48756	0.986827	2	5.59769	1.00532	2	10.0817	1.06971	2	19.1406	0.953564	2	3.87486	0.985399	2	11.841	0.988524	2	7.91982	1.03523	2	0.286278
A0A452FR97	Phosphoglycerate mutase OS=Capra hircus OX=9925 GN=PGAM1 PE=3 SV=1 - [A0A452FR97_CAPHI]	32.76	9.84	1	2	2	2	2.18104	2	16.3028	1.93232	2	3.07382	1.92765	2	0.388517	1.89741	2	4.7996	1.8022	2	0.702867	0.608746	2	11.8135	0.703234	2	4.79664	0.580098	2	11.1699	0.574846	2	4.17431	0.624201	2	4.43873	0.620291	2	7.57522	0.552968	2	9.27321	0.566365	2	3.74409	0.535397	2	2.54361
A0A8C2N7C2	Pyruvate kinase OS=Capra hircus OX=9925 PE=3 SV=1 - [A0A8C2N7C2_CAPHI]	31.47	4.8	7	1	3	5	1.44229	3	18.0732	1.28194	3	15.5031	1.39246	3	27.3984	1.30081	3	13.5034	1.27045	3	16.7314	0.87164	3	3.39889	0.944768	3	10.9575	0.877033	3	9.11873	1.03848	3	5.10713	0.805802	3	13.7022	0.864428	3	8.64885	0.731672	3	30.0657	0.795375	3	36.6586	0.839762	3	20.54
A0A8C2R932	RMT2 domain-containing protein OS=Capra hircus OX=9925 PE=4 SV=1 - [A0A8C2R932_CAPHI]	31.04	10.94	2	1	1	1	1.07271	1		0.963321	1		0.87949	1		1.02928	1		0.79863	1		1.04961	1		1.09176	1		1.06688	1		1.05654	1		0.975376	1		1.02346	1		1.21909	1		0.915777	1		0.959351	1
A0A452G865	Amyloid-beta A4 protein OS=Capra hircus OX=9925 GN=APP PE=3 SV=1 - [A0A452G865_CAPHI]	31	1.85	7	2	2	2	0.999313	2	11.0486	0.997652	2	9.23103	1.02895	2	7.86415	1.04958	2	4.08998	0.918987	2	5.64621	0.987182	2	4.93683	1.07228	2	3.8094	0.927981	2	2.77155	0.963325	2	3.91172	1.03709	2	10.1322	0.972951	2	0.413463	1.03891	2	1.30215	1.0193	2	1.41327	1.01666	2	5.68311
A0A8C2PKF1	Chloride channel accessory 1 OS=Capra hircus OX=9925 PE=3 SV=1 - [A0A8C2PKF1_CAPHI]	30.82	2.36	6	1	1	1	0.951392	1		1.0103	1		0.915519	1		1.02705	1		1.02572	1		1.02319	1		1.04458	1		1.02437	1		1.03903	1		0.972121	1		0.94219	1		1.04164	1		0.967246	1		1.04442	1
A0A452G5R6	Haptoglobin OS=Capra hircus OX=9925 GN=LOC102176354 PE=4 SV=1 - [A0A452G5R6_CAPHI]	30.7936	11.5	11	5	5	10	0.433576	10	41.5184	0.392213	10	27.8413	0.378843	10	38.0272	0.460491	10	20.6466	0.393429	10	29.0935	2.07937	10	8.23117	2.09498	10	12.7734	2.1167	10	9.49977	2.26089	10	9.36967	0.535843	10	27.4778	2.14499	10	11.7756	0.468296	10	15.5667	0.511502	10	15.3634	0.457653	10	21.3921
A0A8C2NIL3	Ig-like domain-containing protein OS=Capra hircus OX=9925 PE=4 SV=1 - [A0A8C2NIL3_CAPHI]	30.75	2.91	2	1	1	2	0.930351	2	5.85827	0.998488	2	6.13426	1.0516	2	12.671	1.0058	2	6.41423	0.986792	2	1.15816	1.02501	2	0.350319	1.03658	2	3.63162	0.975807	2	2.4768	1.01695	2	8.95263	1.01431	2	0.713884	0.924004	2	7.08861	1.01311	2	4.26745	1.00572	2	0.329828	1.08372	2	4.87444
A0A452EV07	Osteoglycin OS=Capra hircus OX=9925 GN=OGN PE=3 SV=1 - [A0A452EV07_CAPHI]	29.5116	7.72	5	1	1	2	0.961211	2	13.6556	1.04363	2	0.0140374	1.01314	2	8.32194	1.03537	2	1.49732	0.968801	2	0.418866	1.0435	2	5.96524	1.02351	2	2.57099	1.05107	2	8.3965	0.958723	2	2.68229	1.02194	2	0.955769	1.02585	2	0.77171	0.99168	2	8.11202	0.965844	2	5.24074	1	2	2.26667
A0A452FTJ0	Calreticulin OS=Capra hircus OX=9925 GN=CALR PE=3 SV=1 - [A0A452FTJ0_CAPHI]	29.44	9.11	2	4	4	4	0.987781	4	6.01853	0.972481	4	4.48264	0.970804	4	2.48627	1.00367	4	4.99806	0.983424	4	2.60427	0.964269	4	1.40697	0.987629	4	5.36812	0.995253	4	1.28413	1.03186	4	5.00084	1.02594	4	2.83827	1.00481	4	3.70915	1.01461	4	2.85882	1.05191	4	1.55752	1.02273	4	1.28866
A0A452EQW1	Ubiquitin C OS=Capra hircus OX=9925 GN=UBC PE=4 SV=1 - [A0A452EQW1_CAPHI]	28.68	10.99	11	1	1	1	1.00253	1		0.99034	1		0.960611	1		0.925834	1		0.958745	1		1.08759	1		1.03433	1		1.10539	1		1.09997	1		0.937562	1		1.02076	1		0.941781	1		0.954287	1		1.0416	1
A0A8C2NVQ6	GDNF family receptor alpha 4 OS=Capra hircus OX=9925 PE=3 SV=1 - [A0A8C2NVQ6_CAPHI]	28.66	2.52	1	1	1	1	1.08653	1		0.949263	1		1.03493	1		1.08665	1		1.20407	1		1.00637	1		1.05109	1		1.07484	1		1.03937	1		0.808158	1		1.18197	1		0.861624	1		0.907531	1		0.902908	1
A0A8C2R5N3	C-type lectin domain-containing protein OS=Capra hircus OX=9925 PE=4 SV=1 - [A0A8C2R5N3_CAPHI]	28.47	3.89	5	1	1	3
A0A452G6Z0	Chromosome 19 open reading frame 54 OS=Capra hircus OX=9925 GN=C19orf54 PE=3 SV=1 - [A0A452G6Z0_CAPHI]	27.8	1.44	12	1	1	3
A0A8C2NH45	Interleukin 1 receptor accessory protein OS=Capra hircus OX=9925 GN=IL1RAP PE=3 SV=1 - [A0A8C2NH45_CAPHI]	27.65	8.27	19	6	6	11	0.956236	10	6.54866	0.908431	10	4.10049	0.903363	10	6.52981	0.935346	10	4.14639	0.928624	10	2.88587	1.13883	10	2.90253	1.11807	10	4.89752	1.12875	10	5.58556	1.11816	10	6.0168	0.945298	10	1.87741	1.13017	10	6.96295	0.956707	10	7.53238	0.948836	10	5.39026	0.949529	10	3.30706
A0A452DRB9	VWFA domain-containing protein OS=Capra hircus OX=9925 PE=4 SV=1 - [A0A452DRB9_CAPHI]	27.24	4.02	5	3	3	3	1.07739	3	1.3563	1.00475	3	0.221587	1.16391	3	4.83977	1.0656	3	2.46171	1.02723	3	7.09416	0.914825	3	4.48323	1.00276	3	9.7134	0.915437	3	6.53568	0.996507	3	12.7286	1.06313	3	2.62049	0.884965	3	15.0947	1.05129	3	0.207582	0.98096	3	2.37362	1.00515	3	4.84755
A0A452EEZ8	Reticulocalbin 1 OS=Capra hircus OX=9925 GN=RCN1 PE=4 SV=1 - [A0A452EEZ8_CAPHI]	26.98	4.83	5	1	1	1	1.17584	1		1.12906	1		1.08079	1		1.17261	1		1.16157	1		0.856297	1		0.802171	1		0.818051	1		0.758702	1		1.06911	1		0.755446	1		0.97294	1		1.09376	1		1.12472	1
A0A8C2QT51	WASH complex subunit 4 OS=Capra hircus OX=9925 PE=4 SV=1 - [A0A8C2QT51_CAPHI]	26.67	1.17	19	2	2	2	0.810778	1		1.05457	1		0.779911	1		0.941922	1		0.91959	1		1.03289	1		1.03972	1		1.11287	1		1.11005	1		1.01773	1		1.23073	1		0.901903	1		1.09576	1		0.959744	1
A0A8C2SJY2	Acyl-CoA dehydrogenase short/branched chain OS=Capra hircus OX=9925 PE=3 SV=1 - [A0A8C2SJY2_CAPHI]	26.31	5.66	5	1	1	1	0.927247	1		1.05668	1		1.15521	1		1.0223	1		0.980389	1		1.07546	1		0.993869	1		0.969525	1		0.980258	1		1.02752	1		0.9287	1		1.07934	1		1.05457	1		0.960593	1
A0A452EUZ5	Matrix metallopeptidase 2 OS=Capra hircus OX=9925 GN=MMP2 PE=3 SV=1 - [A0A452EUZ5_CAPHI]	25.9944	7.41	2	3	3	5	0.993431	5	4.42911	0.965659	5	8.49366	0.965894	5	4.9564	0.994237	5	3.17832	1.00783	5	0.124137	1.01556	5	2.66706	1.01714	5	3.68045	0.997052	5	3.16889	1.00311	5	3.93286	0.976095	5	5.48163	1.03224	5	3.77185	1.03093	5	2.8339	1.06738	5	6.5329	1.02538	5	1.98656
A0A8C2RQR2	Uncharacterized protein OS=Capra hircus OX=9925 PE=3 SV=1 - [A0A8C2RQR2_CAPHI]	25.82	3.47	17	1	1	1	1.09463	1		1.13188	1		1.00165	1		1.12298	1		1.08771	1		0.952535	1		1.1443	1		0.98395	1		1.08363	1		0.881698	1		1.03063	1		0.910373	1		0.8771	1		0.952019	1
A0A452EHU1	Beta-1,4-glucuronyltransferase 1 OS=Capra hircus OX=9925 GN=B4GAT1 PE=3 SV=1 - [A0A452EHU1_CAPHI]	25.27	6.02	2	2	2	2	0.824723	2	22.5241	0.833223	2	31.6935	0.863521	2	19.3587	1.35015	2	67.3787	0.827877	2	24.1149	0.940703	2	4.70577	0.966359	2	22.7656	0.998017	2	8.64731	0.91665	2	13.9824	0.948798	2	12.839	1.05491	2	1.84986	0.931946	2	19.5657	1.36595	2	34.4953	0.972388	2	11.7281
A0A452G212	Osteomodulin OS=Capra hircus OX=9925 GN=OMD PE=4 SV=1 - [A0A452G212_CAPHI]	24.54	1.9	2	1	1	2	1.08438	2	10.7452	1.04176	2	8.66409	1.07901	2	9.36532	0.991097	2	11.2012	1.00832	2	6.40908	0.979119	2	11.8229	0.982214	2	11.2836	0.887511	2	3.42686	0.936494	2	2.01353	0.99276	2	14.7612	0.936785	2	0.422902	0.995727	2	7.04501	1.01064	2	15.8799	1.10201	2	9.66861
A0A452FF95	Ig-like domain-containing protein OS=Capra hircus OX=9925 PE=4 SV=1 - [A0A452FF95_CAPHI]	24.52	26.02	1	1	3	10	0.751671	3	10.5697	0.856413	3	7.77813	0.769506	3	9.14892	0.777903	3	4.75426	0.872101	3	18.4973	1.42263	3	4.42401	1.31003	3	1.57281	1.27153	3	2.36182	1.30175	3	2.7974	0.864116	3	1.01334	1.42042	3	0.0331161	0.817148	3	7.80042	0.917544	3	1.76808	0.902181	3	9.65045
A0A452EDH2	Uncharacterized protein OS=Capra hircus OX=9925 GN=ACSM2B PE=3 SV=1 - [A0A452EDH2_CAPHI]	24.42	3.45	7	1	1	1	0.711107	1		1.12402	1		1.09975	1		0.816615	1		1.12923	1		0.877313	1		0.79672	1		1.36369	1		0.9702	1		1.30208	1		1.21672	1		1.09247	1		0.988069	1		0.837599	1
A0A452EWM9	Integrator complex subunit 4 OS=Capra hircus OX=9925 GN=INTS4 PE=4 SV=1 - [A0A452EWM9_CAPHI]	23.98	1.24	2	1	1	1	0.733893	1		0.820742	1		0.815637	1		1.00302	1		0.926116	1		0.865412	1		0.938109	1		0.973371	1		0.992006	1		1.06159	1		1.02124	1		1.12828	1		1.24565	1		1.05814	1
A0A452G4Y2	ADAM metallopeptidase with thrombospondin type 1 motif 13 OS=Capra hircus OX=9925 GN=ADAMTS13 PE=4 SV=1 - [A0A452G4Y2_CAPHI]	23.92	2.68	11	3	3	3	0.873105	2	21.5444	0.948836	2	0.104289	0.902893	2	6.44112	0.983037	2	11.7125	0.991502	2	0.210257	1.07786	2	7.43809	1.03306	2	3.96942	1.1266	2	7.66601	1.10212	2	3.42004	1.02841	2	12.3585	1.06713	2	2.90909	0.989167	2	12.7721	0.984353	2	1.53303	0.993501	2	1.8482
A0A452ET10	ADAM like decysin 1 OS=Capra hircus OX=9925 GN=ADAMDEC1 PE=4 SV=1 - [A0A452ET10_CAPHI]	23.76	1.76	9	1	1	2	1.47921	2	0.830767	1.42323	2	9.34641	1.35058	2	11.9059	1.37068	2	11.9022	1.39175	2	11.8807	0.82127	2	7.89021	0.806419	2	5.87523	0.767586	2	17.6604	0.745973	2	12.1731	0.842252	2	1.17453	0.752709	2	13.4853	0.892715	2	7.95245	0.824834	2	0.0332174	0.884512	2	4.68215
A0A8C2Y1J0	oxoglutarate dehydrogenase (succinyl-transferring) OS=Capra hircus OX=9925 PE=3 SV=1 - [A0A8C2Y1J0_CAPHI]	23.55	1.05	32	2	2	2	0.948484	1		0.947539	1		0.954533	1		0.995136	1		0.919049	1		0.919157	1		0.926719	1		0.92564	1		0.916347	1		1.14163	1		0.901633	1		1.11655	1		1.13276	1		1.13281	1
A0A452F2E5	Interferon alpha inducible protein 6 OS=Capra hircus OX=9925 GN=IFI6 PE=3 SV=1 - [A0A452F2E5_CAPHI]	23.31	8.15	1	1	1	1	1.02652	1		0.950136	1		0.972792	1		0.913403	1		1.01555	1		1.06047	1		1.06389	1		1.06731	1		1.08672	1		0.934138	1		1.0518	1		0.937532	1		0.934252	1		1.04084	1
A0A8C2QPX4	Hes related family bHLH transcription factor with YRPW motif like OS=Capra hircus OX=9925 GN=HEYL PE=4 SV=1 - [A0A8C2QPX4_CAPHI]	22.26	2.99	3	1	1	7	1.06171	7	10.2627	0.946176	7	10.9756	1.01709	7	7.95659	1.04073	7	7.68859	1.00659	7	13.4236	0.965428	7	11.1837	0.952407	7	10.3497	1.01674	7	9.46803	1.00955	7	11.7206	1.08061	7	7.64793	0.939236	7	11.596	0.969564	7	10.6136	1.04415	7	8.3483	1.05542	7	15.6326
A0A452G2G1	Protein S100 OS=Capra hircus OX=9925 GN=S100A4 PE=3 SV=1 - [A0A452G2G1_CAPHI]	22.15	8.91	2	1	1	2	1.15758	2	4.64681	1.10392	2	0.00341635	1.20331	2	4.73862	1.16179	2	6.59086	1.20456	2	1.83403	0.952626	2	7.0213	0.996207	2	3.25811	0.98756	2	3.30749	0.986226	2	5.50038	0.862692	2	2.81945	0.921088	2	3.47031	0.927151	2	12.9217	0.88293	2	16.0998	0.950233	2	1.15945
A0A8C2PIK0	Thrombospondin 4 OS=Capra hircus OX=9925 GN=THBS4 PE=3 SV=1 - [A0A8C2PIK0_CAPHI]	22.05	3.45	4	2	2	3	1.20696	3	17.1418	1.30792	3	6.64628	1.31159	3	11.0002	1.1711	3	7.54468	1.29527	3	1.18994	0.775286	3	15.4167	0.71297	3	24.637	0.849527	3	37.0929	0.752876	3	35.3622	1.05681	3	4.75598	0.881243	3	43.0357	1.00867	3	2.03031	1.05782	3	10.8076	0.981353	3	18.7741
A0A8C2Y489	Semaphorin 3F OS=Capra hircus OX=9925 PE=3 SV=1 - [A0A8C2Y489_CAPHI]	21.91	0.93	9	1	1	2	0.734214	2	73.7297	1.0115	2	26.0135	1.08097	2	33.3283	0.767938	2	43.7813	1.09519	2	23.728	0.981655	2	41.8616	0.733535	2	57.0348	0.989958	2	37.508	0.747008	2	40.6328	1.27743	2	39.7585	1.00358	2	43.0717	1.27379	2	45.2187	0.848574	2	67.2077	0.920493	2	61.0793
A0A8C2NBP7	Olfactomedin like 2B OS=Capra hircus OX=9925 PE=4 SV=1 - [A0A8C2NBP7_CAPHI]	21.73	1.21	7	1	1	1	0.939913	1		0.940872	1		0.90516	1		0.899895	1		0.912891	1		0.967745	1		0.963182	1		0.985992	1		1.02166	1		1.11487	1		0.968884	1		1.11608	1		1.10785	1		1.12865	1
A0A452EAS2	Serpin domain-containing protein OS=Capra hircus OX=9925 GN=LOC108633803 PE=3 SV=1 - [A0A452EAS2_CAPHI]	21.31	2.05	2	1	1	1	1.10686	1		0.919759	1		0.97433	1		1.09917	1		0.961704	1		1.11058	1		1.02863	1		1.06003	1		1.11928	1		0.934367	1		1.12073	1		0.89509	1		1.00628	1		0.94929	1
A0A8C2QR08	receptor protein-tyrosine kinase OS=Capra hircus OX=9925 PE=4 SV=1 - [A0A8C2QR08_CAPHI]	21.28	1.05	3	1	1	46	1.01086	46	9.8138	0.97228	46	7.17826	1.04108	46	7.52323	0.952209	46	10.0058	1.00311	46	7.8196	0.981839	46	9.47373	0.996832	46	8.91628	0.962696	46	10.4931	1.01785	46	8.90077	0.975694	46	8.65766	0.957151	46	9.2703	1.0492	46	11.0318	1.01305	46	5.64362	1.03807	46	11.178
A0A452DVS7	Neuropilin OS=Capra hircus OX=9925 GN=NRP1 PE=3 SV=1 - [A0A452DVS7_CAPHI]	21.11	1.73	2	1	1	1	1.07778	1		1.04767	1		1.05215	1		0.903778	1		1.05766	1		1.11226	1		1.09157	1		0.96046	1		1.10087	1		0.866831	1		1.19905	1		0.94996	1		0.877461	1		0.953434	1
A0A452FPZ0	Histone H2A/H2B/H3 domain-containing protein OS=Capra hircus OX=9925 PE=3 SV=1 - [A0A452FPZ0_CAPHI]	21.03	5.36	17	1	1	2	0.820457	2	7.42647	0.884369	2	0.918736	0.904608	2	3.09628	0.832816	2	7.65215	0.888319	2	5.92006	1.12511	2	3.50446	1.0488	2	8.85069	1.13913	2	3.83999	1.15054	2	13.7543	0.954546	2	10.5494	1.18495	2	6.84374	1.05058	2	11.777	0.984214	2	8.24481	1.01399	2	2.5245
D6PX62	Cysteine-rich secretory protein 3 OS=Capra hircus OX=9925 GN=Crisp3 PE=2 SV=1 - [D6PX62_CAPHI]	20.79	2.87	2	1	1	1	1.211	1		0.910454	1		0.949102	1		0.930503	1		0.854198	1		1.13019	1		1.08957	1		0.993371	1		1.11675	1		0.935297	1		1.05212	1		0.973571	1		1.13247	1		0.891791	1
A0A452FNU8	Nipsnap homolog 1 OS=Capra hircus OX=9925 GN=NIPSNAP1 PE=3 SV=1 - [A0A452FNU8_CAPHI]	20.51	8.45	6	1	1	1	0.89555	1		1.03543	1		0.80329	1		0.973721	1		0.987075	1		1.13124	1		0.858406	1		0.90574	1		1.16739	1		1.20582	1		1.08547	1		0.998537	1		1.29247	1		0.861942	1
A0A452EX68	YLP motif containing 1 OS=Capra hircus OX=9925 GN=YLPM1 PE=4 SV=1 - [A0A452EX68_CAPHI]	19.93	0.65	8	1	1	2	0.836698	2	12.9173	0.969096	2	17.1468	1.02966	2	9.02884	0.897409	2	11.7075	0.977044	2	6.90971	1.02164	2	8.43262	0.8158	2	0.799229	1.00732	2	15.9986	0.92039	2	1.38724	1.20778	2	6.01993	1.03752	2	17.3941	1.15664	2	2.27379	1.0583	2	21.1065	1.03849	2	12.9873
A0A8C2RNX2	C1q domain-containing protein OS=Capra hircus OX=9925 PE=4 SV=1 - [A0A8C2RNX2_CAPHI]	19.58	8.89	3	2	2	4	1.05742	4	6.13482	1.03873	4	6.92256	1.11482	4	9.69088	0.919724	4	4.33754	1.14847	4	3.08037	0.883765	4	8.33212	0.78633	4	14.6053	0.872608	4	7.54646	0.721135	4	28.729	1.19254	4	11.0246	0.964261	4	2.84166	1.2162	4	11.2843	1.03548	4	13.0605	1.08688	4	1.91022
A0A8C2RKG9	Mannose binding lectin 2 OS=Capra hircus OX=9925 PE=4 SV=1 - [A0A8C2RKG9_CAPHI]	19.12	3.54	4	1	1	3	0.944166	3	1.88606	0.901427	3	3.30434	0.900501	3	2.17561	0.94694	3	3.90939	0.919151	3	2.81049	0.928451	3	0.606351	1.02131	3	6.30588	1.02322	3	2.6574	0.983565	3	2.61685	1.05913	3	0.698245	0.987633	3	2.63409	1.0961	3	2.30291	1.07649	3	10.4285	1.09585	3	2.98425
A0A452E5S9	Extracellular matrix protein 1 OS=Capra hircus OX=9925 GN=ECM1 PE=4 SV=1 - [A0A452E5S9_CAPHI]	18.73	5.53	2	4	4	6	1.17998	6	7.88172	1.20256	6	4.3625	1.10348	6	6.63994	1.17517	6	7.61793	1.11893	6	10.3893	1.03878	6	6.17037	1.08663	6	10.8162	1.05789	6	3.82917	1.04468	6	2.43488	0.837797	6	5.96994	1.01672	6	6.22403	0.832616	6	7.9538	0.867903	6	5.58549	0.814697	6	6.0184
A0A8C2QQD8	ST3 beta-galactoside alpha-2,3-sialyltransferase 6 OS=Capra hircus OX=9925 PE=3 SV=1 - [A0A8C2QQD8_CAPHI]	18.11	4.17	6	1	1	1	0.97715	1		0.974515	1		1.03248	1		0.987178	1		1.02406	1		0.93196	1		0.989526	1		0.94148	1		0.953826	1		1.04814	1		0.986736	1		1.07862	1		1.04673	1		1.03978	1
A0A452DN11	Rab proteins geranylgeranyltransferase component A OS=Capra hircus OX=9925 GN=CHML PE=3 SV=1 - [A0A452DN11_CAPHI]	17.14	2.15	3	1	1	1	0.960645	1		1.05815	1		0.907671	1		0.965599	1		0.99096	1		1.0192	1		0.910565	1		0.923617	1		0.967952	1		1.00557	1		0.956077	1		1.05976	1		1.09642	1		1.10446	1
A0A8C2NSX3	Solute carrier family 13 member 4 OS=Capra hircus OX=9925 PE=3 SV=1 - [A0A8C2NSX3_CAPHI]	16.43	1.24	9	1	1	1	0.976566	1		0.916322	1		0.876183	1		0.814462	1		0.863858	1		1.16641	1		1.11901	1		1.15811	1		1.1964	1		0.949545	1		1.26488	1		0.985592	1		0.918693	1		0.878869	1
A0A8C2XT23	Glutaredoxin domain-containing protein OS=Capra hircus OX=9925 PE=4 SV=1 - [A0A8C2XT23_CAPHI]	15.65	17.91	3	1	1	2	0.8925	2	1.27917	0.909401	2	5.38884	0.929242	2	4.07661	1.01627	2	10.9983	0.964465	2	4.74132	1.04736	2	1.28865	1.10895	2	0.155657	1.07389	2	6.12248	1.12058	2	7.41973	0.944751	2	8.84764	1.09662	2	5.13424	0.992413	2	1.63725	0.989195	2	3.40846	1.01047	2	0.98112
A0A8C2QT46	Junction adhesion molecule like OS=Capra hircus OX=9925 GN=JAML PE=4 SV=1 - [A0A8C2QT46_CAPHI]	15.17	2.49	4	1	1	2	1.11102	2	0.116752	1.10486	2	0.158466	1.03667	2	1.58462	1.10708	2	1.56606	1.07752	2	1.08905	0.919722	2	4.139	0.955962	2	1.39034	0.912248	2	6.9888	0.915227	2	2.68216	0.978308	2	3.24143	0.993478	2	2.89511	0.969368	2	2.68688	1.03564	2	4.01034	0.994961	2	2.50268
A0A452F238	Thrombopoietin OS=Capra hircus OX=9925 GN=THPO PE=3 SV=1 - [A0A452F238_CAPHI]	15.1	5.33	2	1	1	1	0.890006	1		0.746584	1		0.737065	1		0.871655	1		0.719668	1		1.04608	1		0.978369	1		1.51155	1		1.00543	1		1.15636	1		1.27768	1		1.42878	1		0.773774	1		0.754737	1
A0A452E6F8	Eukaryotic translation initiation factor 2 subunit 1 OS=Capra hircus OX=9925 GN=EIF2S1 PE=3 SV=1 - [A0A452E6F8_CAPHI]	0	4.13	2	1	1	3	1.03243	3	0.613023	1.00431	3	0.206661	0.924295	3	0.674456	1.03443	3	5.27313	0.960077	3	4.08832	1.03046	3	2.08133	1.062	3	0.443892	1.00067	3	2.10414	1.00679	3	2.82747	0.995041	3	2.1796	1.00138	3	3.03686	1.01367	3	0.691792	1.01715	3	0.964061	0.988179	3	6.12393
A0A452E2H7	Elongation factor 1-alpha OS=Capra hircus OX=9925 GN=EEF1A1 PE=3 SV=1 - [A0A452E2H7_CAPHI]	0	8.66	7	2	2	5	0.980863	5	6.69074	1.00337	5	11.4577	0.945066	5	3.20714	0.872202	5	1.77363	1.00015	5	6.79183	1.00912	5	21.2338	1.00696	5	7.74352	0.953421	5	8.41669	0.961432	5	15.4108	1.00494	5	1.3735	0.964733	5	17.9714	1.11582	5	17.9775	1.11003	5	8.61182	1.04214	5	12.7609
A0A8C2QR66	Ras-related protein Rap-1b OS=Capra hircus OX=9925 GN=RAP1B PE=4 SV=1 - [A0A8C2QR66_CAPHI]	0	18.64	9	2	2	2	1.04452	2	1.30391	1.00278	2	1.86054	0.973992	2	10.1073	1.05776	2	5.36769	0.988379	2	3.88296	1.14028	2	9.0459	1.1807	2	1.41465	1.08976	2	7.70434	1.10481	2	14.7684	0.947288	2	14.1785	1.12783	2	8.19053	0.88853	2	10.2658	0.893439	2	12.4355	0.84207	2	15.941
A0A452EMA0	Proteasome subunit alpha type OS=Capra hircus OX=9925 GN=PSMA7 PE=3 SV=1 - [A0A452EMA0_CAPHI]	0	4.44	1	1	1	1	0.975884	1		0.917774	1		0.921789	1		1.01491	1		1.02556	1		0.996053	1		1.03088	1		0.988637	1		0.959115	1		1.07237	1		1.01085	1		1.0389	1		1.01232	1		0.982908	1
A0A452E8A6	Type-1 angiotensin II receptor OS=Capra hircus OX=9925 GN=AGTR1 PE=3 SV=1 - [A0A452E8A6_CAPHI]	0	2.23	1	1	1	1	0.989748	1		1.05002	1		0.828925	1		1.00785	1		0.819907	1		1.13703	1		1.06612	1		1.10902	1		1.09884	1		1.07791	1		1.19132	1		1.0138	1		0.999904	1		0.852918	1
A0A452FB11	Proteasome subunit alpha type OS=Capra hircus OX=9925 GN=PSMA1 PE=3 SV=1 - [A0A452FB11_CAPHI]	0	4.18	4	1	1	1	1.14705	1		1.05224	1		1.11284	1		1.08987	1		1.20539	1		0.907916	1		0.976125	1		0.75102	1		1.09104	1		1.01568	1		0.903669	1		0.989287	1		1.06033	1		0.850298	1
A0A8C2QW41	Calmodulin 2 OS=Capra hircus OX=9925 PE=4 SV=1 - [A0A8C2QW41_CAPHI]	0	20.48	16	1	1	1	1.17496	1		1.13241	1		1.1481	1		1.07541	1		1.15524	1		0.908974	1		0.944896	1		0.955085	1		0.97619	1		0.935494	1		0.879064	1		1.05719	1		0.917802	1		0.882305	1
A0A452EC86	F-box and leucine rich repeat protein 3 OS=Capra hircus OX=9925 GN=FBXL3 PE=4 SV=1 - [A0A452EC86_CAPHI]	0	3.96	1	1	1	1	1.1053	1		0.973747	1		0.96273	1		1.03724	1		1.04994	1		1.00738	1		1.0361	1		0.97933	1		0.990884	1		0.983422	1		1.08575	1		0.968117	1		1.07447	1		0.970455	1
A0A452FN24	Keratin 3 OS=Capra hircus OX=9925 GN=KRT3 PE=3 SV=1 - [A0A452FN24_CAPHI]	0	1.71	3	1	1	1	1.08191	1		1.05692	1		1.08864	1		1.02751	1		1.05799	1		0.954155	1		1.03553	1		0.960032	1		1.01814	1		0.94662	1		0.931415	1		0.974355	1		0.977359	1		1.02678	1
A0A452G904	Neuronal cell adhesion molecule OS=Capra hircus OX=9925 GN=NRCAM PE=3 SV=1 - [A0A452G904_CAPHI]	0	0.52	13	1	1	1	0.384884	1		0.34597	1		0.389684	1		0.336027	1		0.39072	1		0.415611	1		0.405931	1		0.502444	1		0.383337	1		2.01427	1		0.407817	1		2.09821	1		2.11127	1		2.11337	1
A0A452DT86	Ribonucleoprotein, PTB binding 1 OS=Capra hircus OX=9925 GN=RAVER1 PE=4 SV=1 - [A0A452DT86_CAPHI]	0	5.87	1	1	1	1				1.25741	1					1.47251	1		1.03959	1		1.70155	1		1.11527	1		1.35367	1		2.5801	1		1.71991	1					1.7579	1		0.913073	1
A0A452F2D8	Cytoplasmic linker associated protein 2 OS=Capra hircus OX=9925 GN=CLASP2 PE=4 SV=1 - [A0A452F2D8_CAPHI]	0	0.34	8	1	1	1	0.990645	1		1.01505	1		0.954871	1		1.01873	1		0.97953	1		1.14029	1		1.33066	1		1.15456	1		1.6629	1		1.03146	1		1.0442	1		0.710683	1		0.799354	1		0.670334	1
A0A452FYE8	Leucine rich repeat containing G protein-coupled receptor 6 OS=Capra hircus OX=9925 GN=LGR6 PE=4 SV=1 - [A0A452FYE8_CAPHI]	0	1.66	1	1	1	2	0.965693	2	22.2132	1.08058	2	15.139	1.07376	2	9.5892	1.04027	2	17.9454	1.03897	2	2.7638	0.940039	2	2.13022	1.01869	2	5.48376	1.02671	2	4.90147	1.18619	2	17.243	0.935741	2	13.2532	0.925455	2	1.00996	0.933306	2	16.9021	1.04396	2	5.11299	0.866811	2	11.1079
A0A452G8U6	Myosin heavy chain 2 OS=Capra hircus OX=9925 GN=MYH2 PE=3 SV=1 - [A0A452G8U6_CAPHI]	0	0.99	4	1	1	1	0.826702	1		0.741583	1		0.679056	1		0.697252	1		0.745495	1		1.11221	1		1.08507	1		1.17933	1		1.02673	1		1.00733	1		1.10291	1		1.21657	1		1.09303	1		1.23302	1
A0A452E4R5	Zinc finger protein 311 OS=Capra hircus OX=9925 GN=ZNF311 PE=4 SV=1 - [A0A452E4R5_CAPHI]	0	1.09	2	1	1	1	0.647457	1		1.15398	1		1.13721	1		0.700256	1		1.09973	1		1.19341	1		0.85713	1		1.26088	1		0.750438	1		1.29056	1		1.26539	1		1.36129	1		0.788085	1		0.763014	1
A0A452DK26	Cytochrome P450 OS=Capra hircus OX=9925 GN=LOC102179192 PE=3 SV=1 - [A0A452DK26_CAPHI]	0	4.33	6	1	1	1	1.09905	1		1.01733	1		1.05893	1		0.941027	1		0.976511	1		1.05776	1		1.06175	1		1.00302	1		0.947377	1		0.898519	1		0.980262	1		1.03058	1		0.967982	1		1.05903	1
A0A452DVJ2	Zinc finger protein 622 OS=Capra hircus OX=9925 GN=ZNF622 PE=3 SV=1 - [A0A452DVJ2_CAPHI]	0	1.31	4	1	1	2	0.723054	2	49.225	1.05169	2	20.4891	1.07497	2	28.5469	0.829981	2	39.5396	1.04906	2	36.7089	1.05414	2	31.9273	0.846841	2	34.8628	1.05649	2	33.7908	0.910202	2	46.2936	1.23873	2	25.2791	1.04062	2	22.3744	1.19909	2	33.3849	0.821614	2	35.8698	0.934427	2	52.2954
A0A452ECG1	Ig-like domain-containing protein OS=Capra hircus OX=9925 PE=4 SV=1 - [A0A452ECG1_CAPHI]	0	16.67	3	1	1	2	0.847462	2	12.2674	0.939254	2	12.9487	1.02162	2	7.95719	1.06777	2	8.10453	0.985117	2	2.7039	1.0574	2	6.93507	1.03597	2	6.84562	0.997788	2	12.7027	1.00587	2	3.17808	1.03899	2	3.07161	0.936979	2	15.7471	1.01934	2	3.76207	1.04673	2	1.25465	1.0229	2	3.67593
A0A452EQZ4	Malate dehydrogenase OS=Capra hircus OX=9925 GN=MDH1 PE=3 SV=1 - [A0A452EQZ4_CAPHI]	0	2.13	3	1	1	1	1.13977	1		1.13131	1		1.19536	1		1.34077	1		1.1664	1		0.799487	1		0.881227	1		0.877481	1		0.905327	1		0.881525	1		0.902396	1		0.981269	1		0.885284	1		0.971853	1
A0A452DLY8	Microtubule-associated protein OS=Capra hircus OX=9925 GN=MAP2 PE=4 SV=1 - [A0A452DLY8_CAPHI]	0	0.76	7	1	1	1	0.868461	1		1.012	1		1.09302	1		0.993212	1		0.962332	1		0.922793	1		0.969271	1		1.00962	1		0.930556	1		1.0559	1		0.999324	1		1.04293	1		1.04526	1		1.04067	1
A0A452EH88	RCR-type E3 ubiquitin transferase OS=Capra hircus OX=9925 GN=MYCBP2 PE=3 SV=1 - [A0A452EH88_CAPHI]	0	0.46	3	1	1	1	0.376463	1		1.35068	1		0.605941	1		0.913907	1		0.48432	1		1.32918	1		1.1107	1		1.659	1		1.21205	1		1.30901	1		0.495424	1		1.31123	1		0.87695	1		1.09478	1
A0A452EX54	Alpha-galactosidase OS=Capra hircus OX=9925 GN=GLA PE=3 SV=1 - [A0A452EX54_CAPHI]	0	4.1	1	1	1	1	1.10923	1		1.09766	1		0.883298	1		0.941122	1		0.968696	1		1.0632	1		1.10148	1		1.08768	1		1.08882	1		0.975797	1		1.0603	1		0.901557	1		0.924109	1		1.00482	1
A0A452FCU2	Farnesyl pyrophosphate synthase OS=Capra hircus OX=9925 GN=FDPS PE=3 SV=1 - [A0A452FCU2_CAPHI]	0	5.1	5	1	1	1	0.908608	1		0.81073	1		0.881449	1		0.930485	1		0.810987	1		1.02363	1		1.05252	1		0.980505	1		0.994477	1		1.11565	1		1.04064	1		1.08932	1		1.13676	1		1.10941	1
A0A452EB15	RRM domain-containing protein OS=Capra hircus OX=9925 PE=4 SV=1 - [A0A452EB15_CAPHI]	0	1.39	2	1	1	1	1.10684	1		1.07104	1		1.07616	1		1.1032	1		1.07311	1		1.03285	1		1.05616	1		1.01133	1		0.951195	1		1.00391	1		0.997736	1		0.871774	1		0.93709	1		0.915972	1
A0A452FXW5	ADAM metallopeptidase with thrombospondin type 1 motif 6 OS=Capra hircus OX=9925 GN=ADAMTS6 PE=4 SV=1 - [A0A452FXW5_CAPHI]	0	0.54	1	1	1	1	1.19373	1		1.03812	1		1.10214	1		1.08047	1		1.17613	1		0.898295	1		1.03319	1		0.864896	1		1.01096	1		1.01114	1		0.823927	1		0.905079	1		0.884403	1		1.06958	1
A0A452FYD8	Lysine methyltransferase 2E (inactive) OS=Capra hircus OX=9925 GN=KMT2E PE=4 SV=1 - [A0A452FYD8_CAPHI]	0	1.16	3	1	1	1	1.04559	1		1.0808	1		0.930615	1		1.12216	1		1.03055	1		1.00368	1		0.922703	1		0.903818	1		0.952462	1		1.04595	1		1.00648	1		0.979709	1		1.02407	1		1.01203	1
A0A452EAC7	Pleckstrin homology and RhoGEF domain containing G1 OS=Capra hircus OX=9925 GN=PLEKHG1 PE=4 SV=1 - [A0A452EAC7_CAPHI]	0	1.19	3	1	1	1	1.54235	1		0.735525	1					1.31001	1		0.854009	1		0.938828	1		1.02421	1		1.04572	1		1.22358	1		1.49844	1		1.0685	1					1.30372	1		1.5122	1
A0A452ECA2	Ferritin OS=Capra hircus OX=9925 PE=3 SV=1 - [A0A452ECA2_CAPHI]	0	5.11	1	1	1	1	0.801653	1		0.8858	1		0.72849	1		0.998147	1		0.941196	1		0.90547	1		1.1058	1		1.21335	1		1.1793	1		1.00806	1		0.862894	1		1.04545	1		1.18507	1		1.07994	1
A0A452EF80	Collagen type XX alpha 1 chain OS=Capra hircus OX=9925 GN=COL20A1 PE=4 SV=1 - [A0A452EF80_CAPHI]	0	0.73	4	1	1	1	0.860711	1		0.844431	1		0.830069	1		0.905955	1		0.817439	1		0.979344	1		1.01144	1		1.04653	1		1.0216	1		1.14502	1		1.0207	1		1.08597	1		1.18221	1		1.169	1
A0A452FMH2	Serum amyloid A protein OS=Capra hircus OX=9925 GN=LOC102168428 PE=3 SV=1 - [A0A452FMH2_CAPHI]	0	12.5	6	1	1	1	0.773265	1		0.78991	1		0.78954	1		0.885757	1		0.937783	1		1.45333	1		1.42775	1		1.53191	1		1.66974	1		0.73446	1		1.64767	1		0.606471	1		0.617715	1		0.685595	1
A0A452FHU9	Collagen type I alpha 1 chain OS=Capra hircus OX=9925 GN=COL1A1 PE=4 SV=1 - [A0A452FHU9_CAPHI]	0	2.46	2	4	4	4	1.18038	4	12.6322	1.35704	4	2.72864	1.26808	4	14.4569	1.31545	4	4.4937	1.24951	4	18.3537	0.732929	4	1.28777	0.775167	4	20.7001	0.710055	4	13.0909	0.676044	4	26.2715	1.0246	4	9.49787	0.681609	4	13.7009	0.997711	4	5.41537	1.03123	4	1.04417	1.00292	4	4.99419
A0A452DX94	glutathione transferase OS=Capra hircus OX=9925 GN=LOC102173702 PE=3 SV=1 - [A0A452DX94_CAPHI]	0	8.52	4	2	2	2	0.919601	2	27.5824	1.04942	2	7.92357	1.0752	2	1.58934	1.00326	2	24.0286	1.04014	2	7.41227	0.743586	2	24.4519	0.573382	2	5.96643	0.728196	2	32.394	0.573935	2	5.30573	1.36584	2	13.2078	0.659522	2	20.2462	1.33644	2	7.66954	1.29288	2	0.264389	1.25739	2	7.29606
A0A452FJ85	60S ribosomal protein L7a OS=Capra hircus OX=9925 PE=3 SV=1 - [A0A452FJ85_CAPHI]	0	3.65	2	1	1	1	1.0645	1		1.0046	1		1.09351	1		0.864512	1		1.03437	1		0.989833	1		0.903169	1		0.98687	1		1.07271	1		0.904989	1		0.8555	1		1.14	1		0.900855	1		1.05111	1
A0A452EHB0	aldehyde oxidase OS=Capra hircus OX=9925 GN=AOX1 PE=3 SV=1 - [A0A452EHB0_CAPHI]	0	0.6	2	1	1	1	1.12176	1		1.10392	1		0.996557	1		1.08379	1		1.05712	1		0.936694	1		0.940738	1		0.892577	1		0.901424	1		0.982475	1		0.971428	1		1.04016	1		1.03658	1		1.01415	1
A0A452E8V6	1-acylglycerol-3-phosphate O-acyltransferase 5 OS=Capra hircus OX=9925 GN=AGPAT5 PE=3 SV=1 - [A0A452E8V6_CAPHI]	0	8.49	3	1	1	1	1.2704	1		1.07338	1		0.711424	1		1.68767	1		1.60797	1		1.27123	1		0.867025	1		0.486704	1		0.475519	1		0.892353	1		1.04736	1		0.544927	1		0.992743	1		1.02176	1
A0A452FPF4	Uncharacterized protein OS=Capra hircus OX=9925 PE=4 SV=1 - [A0A452FPF4_CAPHI]	0	6.75	1	1	1	1	0.85746	1		0.946927	1		0.888181	1		1.03983	1		0.920249	1		1.12229	1		1.15773	1		1.05088	1		1.1141	1		1.07926	1		1.02529	1		0.892981	1		0.986238	1		0.983266	1
A0A452EQJ4	PDZ domain-containing protein OS=Capra hircus OX=9925 GN=AHNAK PE=4 SV=1 - [A0A452EQJ4_CAPHI]	0	0.3	1	1	1	1	0.92186	1		0.965076	1		0.94021	1		0.912538	1		0.949984	1		1.04078	1		1.08771	1		1.02346	1		1.07378	1		1.09417	1		1.11135	1		0.970998	1		1.00232	1		0.968771	1
A0A452E0F9	Collagen type II alpha 1 chain OS=Capra hircus OX=9925 GN=COL2A1 PE=4 SV=1 - [A0A452E0F9_CAPHI]	0	0.56	3	1	1	1	1.12906	1		1.10723	1		1.12103	1		1.21503	1		1.13721	1		0.93645	1		0.809655	1		0.836195	1		0.906934	1		0.977119	1		0.816718	1		1.02218	1		1.08637	1		1.03592	1
A0A452EK18	Integrin subunit alpha M OS=Capra hircus OX=9925 GN=ITGAM PE=3 SV=1 - [A0A452EK18_CAPHI]	0	0.52	1	1	1	1	1.15338	1		1.13833	1		1.06358	1		1.1613	1		1.09618	1		0.94079	1		0.985693	1		0.905748	1		0.959451	1		0.927607	1		0.930871	1		0.921394	1		1.00537	1		1.00276	1
A0A452FCD5	Zinc finger C3H1-type containing OS=Capra hircus OX=9925 GN=ZFC3H1 PE=4 SV=1 - [A0A452FCD5_CAPHI]	0	0.46	3	1	1	2	0.765795	2	62.9905	1.09967	2	30.4353	1.13684	2	51.3113	0.788504	2	45.3554	1.16232	2	33.9403	1.15699	2	36.5689	0.833812	2	45.762	1.12271	2	44.2051	0.815643	2	67.8397	1.0201	2	41.6338	1.13981	2	36.6234	1.09712	2	24.2873	0.78846	2	74.3143	0.76536	2	66.0976
A0A452E5P5	Phosphorylase b kinase regulatory subunit OS=Capra hircus OX=9925 GN=PHKA2 PE=3 SV=1 - [A0A452E5P5_CAPHI]	0	1.83	3	1	1	1	0.958973	1		1.26005	1		0.962173	1		1.16868	1		1.1078	1		0.966497	1		0.879041	1		0.698492	1		0.83995	1		1.21785	1		0.746318	1		0.980745	1		0.97408	1		1.05451	1
A0A452FLC3	Coiled-coil domain containing 27 OS=Capra hircus OX=9925 GN=CCDC27 PE=4 SV=1 - [A0A452FLC3_CAPHI]	0	1.68	2	1	1	1	1.1151	1		0.998884	1		0.978767	1		1.01172	1		0.870983	1		0.973795	1		0.857976	1		0.992627	1		0.953819	1		1.08391	1		0.925227	1		1.12421	1		1.09412	1		0.996619	1
A0A452EQM7	Zinc finger protein 569 OS=Capra hircus OX=9925 GN=ZNF569 PE=4 SV=1 - [A0A452EQM7_CAPHI]	0	3.8	1	1	1	1	1.07348	1		0.952236	1		0.921987	1		1.05148	1		1.20457	1		1.01725	1		1.07154	1		0.909768	1		1.18877	1		0.901853	1		0.869808	1		1.01401	1		0.882416	1		1.25632	1
A0A452F6S6	Acyl-CoA binding domain containing 4 OS=Capra hircus OX=9925 GN=ACBD4 PE=4 SV=1 - [A0A452F6S6_CAPHI]	0	8.05	1	1	1	1	1.01933	1		1.08755	1		0.858554	1		1.06153	1		0.983461	1		1.11519	1		1.0673	1		0.937182	1		1.02664	1		0.91123	1		0.910794	1		0.954442	1		1.12558	1		1.04367	1
A0A452EZ01	Tubulin tyrosine ligase like 7 OS=Capra hircus OX=9925 GN=TTLL7 PE=4 SV=1 - [A0A452EZ01_CAPHI]	0	0.79	2	1	1	1	1.04734	1		1.03229	1		0.984097	1		0.996019	1		0.982978	1		0.998079	1		0.957038	1		0.954964	1		1.07548	1		1.00301	1		0.942375	1		0.97708	1		1.02815	1		1.02355	1
A0A452F223	WD repeat domain 46 OS=Capra hircus OX=9925 GN=WDR46 PE=4 SV=1 - [A0A452F223_CAPHI]	0	2.65	2	1	1	1	0.488012	1		1.08837	1		1.10387	1		0.296297	1		1.15378	1		1.60734	1		0.744815	1		1.27009	1		0.95151	1		1.07551	1		0.882306	1		1.21237	1		0.972772	1		1.11913	1
A0A452FF38	Senataxin OS=Capra hircus OX=9925 GN=SETX PE=4 SV=1 - [A0A452FF38_CAPHI]	0	0.88	4	1	1	1	1.01808	1		0.769823	1		0.838753	1		0.847695	1		1.16445	1		1.06079	1		0.672452	1		1.98682	1		0.719006	1		1.06406	1		0.455089	1		0.722687	1		1.73521	1		1.00137	1
A0A452FX33	Mediator of RNA polymerase II transcription subunit 1 OS=Capra hircus OX=9925 GN=MED1 PE=3 SV=1 - [A0A452FX33_CAPHI]	0	0.96	2	1	1	1	1.05518	1		0.95077	1		1.02246	1		1.13701	1		0.987268	1		0.993423	1		0.992892	1		0.92409	1		1.02937	1		1.07414	1		0.897124	1		0.947406	1		1.10452	1		0.995511	1
A0A452FC60	Bromodomain testis associated OS=Capra hircus OX=9925 GN=BRDT PE=4 SV=1 - [A0A452FC60_CAPHI]	0	2.43	6	1	1	1	1.16438	1		1.22227	1		1.20064	1		1.13481	1		1.15448	1		0.980742	1		0.922115	1		0.986878	1		1.00716	1		0.847423	1		1.03898	1		0.781568	1		0.805563	1		1.13916	1
G1DFV8	ATP synthase subunit alpha OS=Capra hircus OX=9925 GN=ATP5A1 PE=2 SV=1 - [G1DFV8_CAPHI]	0	5.42	1	1	1	1	0.953756	1		1.11185	1		0.869717	1		1.0283	1		0.834246	1		0.967056	1		1.07652	1		1.03802	1		1.05976	1		1.03902	1		0.966129	1		0.941049	1		1.08422	1		0.969559	1
A0A452DWC1	Cilia and flagella associated protein 52 OS=Capra hircus OX=9925 GN=CFAP52 PE=4 SV=1 - [A0A452DWC1_CAPHI]	0	1.61	1	1	1	1	0.709855	1		0.783472	1		0.743003	1		0.62811	1		0.668505	1		0.707076	1		0.824695	1		0.77246	1		0.710736	1		1.49203	1		0.857474	1		1.42626	1		1.55796	1		1.47873	1
A0A452EDD9	Acyl-CoA synthetase family member 3 OS=Capra hircus OX=9925 GN=ACSF3 PE=3 SV=1 - [A0A452EDD9_CAPHI]	0	2.73	3	1	1	5	0.969331	5	3.24209	0.962679	5	3.91532	0.908751	5	2.0114	0.982883	5	3.88785	0.948709	5	8.36104	1.04976	5	2.81369	1.07395	5	5.36344	1.05736	5	0.449891	1.08606	5	1.94395	0.974895	5	4.80667	1.06229	5	0.740106	1.04527	5	6.80478	1.00003	5	3.00895	0.994049	5	2.81953
A0A452DZ49	Small kinetochore-associated protein OS=Capra hircus OX=9925 GN=KNSTRN PE=4 SV=1 - [A0A452DZ49_CAPHI]	0	3.85	6	1	1	1	1.43223	1		1.34817	1		1.32383	1		1.29662	1		1.41597	1		0.736244	1		0.628927	1		0.658754	1		0.65317	1		0.918501	1		0.58886	1		1.02909	1		0.961005	1		1.15689	1
A0A452DPY5	Uncharacterized protein OS=Capra hircus OX=9925 PE=4 SV=1 - [A0A452DPY5_CAPHI]	0	0.79	1	1	1	1	1.25449	1		1.23214	1		1.1511	1		1.21289	1		1.25489	1		0.845941	1		0.951711	1		0.903288	1		0.929475	1		0.917077	1		0.904623	1		0.93825	1		0.885868	1		0.902513	1
A0A452F5C5	Epidermal growth factor receptor pathway substrate 15 like 1 OS=Capra hircus OX=9925 GN=EPS15L1 PE=4 SV=1 - [A0A452F5C5_CAPHI]	0	1.21	3	1	1	1	0.758933	1		1.03118	1		1.28214	1		0.885156	1		1.22406	1		1.25805	1		0.742823	1		1.30267	1		0.913722	1		1.08661	1		1.18667	1		1.25129	1		0.640867	1		0.821336	1
A0A452ERW4	CD163 molecule OS=Capra hircus OX=9925 GN=CD163 PE=4 SV=1 - [A0A452ERW4_CAPHI]	0	0.82	9	1	1	1	1.2567	1		1.18554	1		1.43134	1		1.18966	1		1.32485	1		0.924252	1		0.924907	1		0.879822	1		0.938365	1		0.760713	1		0.923914	1		0.862806	1		0.879352	1		0.85885	1
A0A452FAZ5	NEDD4 binding protein 2 OS=Capra hircus OX=9925 GN=N4BP2 PE=4 SV=1 - [A0A452FAZ5_CAPHI]	0	0.68	3	2	2	6	1.04119	6	5.10217	1.04834	6	4.98158	1.02775	6	3.67825	1.01963	6	5.23246	1.02931	6	3.69477	1.05802	6	2.93374	1.06647	6	6.07221	1.04601	6	2.47884	1.05814	6	9.11335	0.930416	6	7.75611	1.03892	6	10.1894	0.96409	6	4.31074	0.953074	6	9.96963	0.952195	6	2.56252
A0A452E1L5	Golgi apparatus protein 1 OS=Capra hircus OX=9925 GN=GLG1 PE=4 SV=1 - [A0A452E1L5_CAPHI]	0	2.88	2	1	1	1	0.992224	1		1.17734	1		1.02901	1		1.01097	1		1.00204	1		0.986161	1		1.0581	1		0.93659	1		0.884214	1		0.953375	1		0.971389	1		0.890816	1		0.987561	1		1.05923	1
A0A452FGY6	E3 ubiquitin-protein ligase OS=Capra hircus OX=9925 GN=UBR1 PE=3 SV=1 - [A0A452FGY6_CAPHI]	0	1.09	2	1	1	1	0.963369	1		0.81155	1		1.49126	1		0.865961	1		0.899951	1		0.89521	1		1.14949	1		1.05756	1		1.06732	1		0.907164	1		0.840292	1		1.01257	1		1.11617	1		1.03744	1
A0A452FD50	Swi5-dependent recombination DNA repair protein 1 homolog OS=Capra hircus OX=9925 GN=SFR1 PE=3 SV=1 - [A0A452FD50_CAPHI]	0	4.02	4	1	1	3	0.999862	3	2.56453	0.989168	3	11.5864	0.966447	3	0.528612	1.04072	3	1.08079	0.954244	3	2.2749	0.981242	3	7.12879	0.991102	3	5.70112	1.04043	3	8.70658	1.02038	3	4.39574	0.989468	3	2.14118	1.0168	3	6.12269	0.970992	3	10.5225	1.02264	3	1.11623	1.042	3	0.133894
A0A452ECC6	Prohibitin OS=Capra hircus OX=9925 GN=PHB1 PE=3 SV=1 - [A0A452ECC6_CAPHI]	0	4.04	2	1	1	1	0.819198	1		0.901754	1		1.03684	1		1.01172	1		0.933768	1		1.0781	1		1.13549	1		1.03343	1		1.08335	1		0.989139	1		1.07963	1		1.00228	1		0.999281	1		1.00577	1
A0A452ED36	B-cell receptor-associated protein OS=Capra hircus OX=9925 GN=BCAP31 PE=3 SV=1 - [A0A452ED36_CAPHI]	0	3.54	2	1	1	1	2.36989	1		2.28564	1		2.45294	1		2.37255	1		2.4712	1		0.495462	1		0.480204	1		0.339696	1		0.440526	1		0.350144	1		0.399785	1		0.332763	1		0.294946	1		0.365175	1
A0A452FVZ1	Serine protease 50 OS=Capra hircus OX=9925 GN=PRSS50 PE=4 SV=1 - [A0A452FVZ1_CAPHI]	0	3.06	2	1	1	1	0.911308	1		0.891914	1		0.851929	1		0.994887	1		0.9274	1		0.848396	1		0.895313	1		0.869412	1		0.909751	1		1.15277	1		0.869638	1		1.2094	1		1.18534	1		1.21011	1
A0A452FHR5	Adaptor related protein complex 1 subunit beta 1 OS=Capra hircus OX=9925 GN=AP1B1 PE=3 SV=1 - [A0A452FHR5_CAPHI]	0	4.42	4	1	1	1	1.40269	1		1.27134	1		1.27029	1		1.24776	1		1.3283	1		0.671401	1		0.809553	1		0.582183	1		0.711958	1		1.14758	1		0.700235	1		0.946329	1		1.05849	1		1.00454	1
A0A452FBN9	Splicing factor 45 OS=Capra hircus OX=9925 GN=LOC102174476 PE=4 SV=1 - [A0A452FBN9_CAPHI]	0	4.04	1	1	1	1	1.16181	1		0.894528	1		0.626074	1		1.04956	1		1.02812	1		0.90535	1		1.0556	1		0.984673	1		0.974798	1		0.993516	1		0.951981	1		1.12042	1		0.882924	1		1.27594	1
A0A452FW98	RNA uridylyltransferase OS=Capra hircus OX=9925 GN=TUT4 PE=3 SV=1 - [A0A452FW98_CAPHI]	0	1.52	3	1	1	1	0.92406	1		0.846769	1		0.835112	1		0.740252	1		0.808127	1		1.09188	1		1.08341	1		1.01769	1		1.20259	1		0.947497	1		1.01677	1		1.12344	1		1.06913	1		1.18353	1
A0A452F837	TLE family member 1, transcriptional corepressor OS=Capra hircus OX=9925 GN=TLE1 PE=3 SV=1 - [A0A452F837_CAPHI]	0	1.17	2	1	1	1	0.845151	1		0.837764	1		0.978843	1		0.820166	1		0.831809	1		0.861636	1		0.86788	1		0.785604	1		0.884691	1		1.2721	1		0.855469	1		1.23872	1		1.31568	1		1.29691	1
A0A452F6I3	Phosphoglucomutase 1 OS=Capra hircus OX=9925 GN=PGM1 PE=3 SV=1 - [A0A452F6I3_CAPHI]	0	2.31	4	1	1	1	1.43059	1		1.36039	1		1.25902	1		1.33584	1		1.29377	1		0.87591	1		0.90597	1		0.83352	1		0.883225	1		0.790073	1		0.862863	1		0.823835	1		0.859726	1		0.846509	1
A0A452FQE3	Malic enzyme OS=Capra hircus OX=9925 GN=ME1 PE=3 SV=1 - [A0A452FQE3_CAPHI]	0	3.68	12	2	2	2	1.11469	2	2.51525	0.975344	2	15.4263	1.17047	2	11.7165	1.19023	2	15.1816	1.05734	2	13.3058	0.808211	2	3.38865	0.836092	2	4.43806	0.807569	2	4.58765	0.826756	2	1.84151	1.11161	2	3.24145	0.780943	2	3.06244	0.984517	2	11.5769	1.29212	2	27.9367	0.998336	2	12.6357
A0A452EFL3	Major histocompatibility complex, class II, DR alpha OS=Capra hircus OX=9925 GN=HLA-DRA PE=3 SV=1 - [A0A452EFL3_CAPHI]	0	6.72	4	1	1	1	0.93014	1		0.955727	1		0.984024	1		0.926429	1		0.894566	1		1.05041	1		1.05536	1		0.976636	1		1.093	1		1.13485	1		1.00163	1		1.05791	1		0.979318	1		0.988773	1
A0A452FSW6	Extended synaptotagmin 1 OS=Capra hircus OX=9925 GN=ESYT1 PE=3 SV=1 - [A0A452FSW6_CAPHI]	0	2.5	3	1	1	1	1.04437	1		1.07364	1		0.930886	1		0.760604	1		0.992481	1		1.28772	1		1.03542	1		1.06667	1		1.1165	1		0.851372	1		1.16005	1		0.903663	1		1.04615	1		0.867045	1
A0A452E098	Spindlin interactor and repressor of chromatin binding OS=Capra hircus OX=9925 GN=SPINDOC PE=4 SV=1 - [A0A452E098_CAPHI]	0	3.96	2	1	1	1	1.07145	1		0.982507	1		1.02004	1		1.04174	1		0.95831	1		1.03404	1		1.12422	1		0.995188	1		0.952511	1		0.99251	1		1.07015	1		0.950979	1		1.08655	1		0.990004	1
A0A452EYE1	Myoferlin OS=Capra hircus OX=9925 GN=MYOF PE=3 SV=1 - [A0A452EYE1_CAPHI]	0	0.84	1	1	1	1	1.36521	1		0.718877	1		0.679707	1		1.16235	1		0.663255	1		1.24637	1		0.463269	1		1.45912	1		1.4995	1		1.39964	1		1.148	1		0.559867	1		1.14084	1		0.52028	1
A0A452EVM2	Angiotensin-converting enzyme OS=Capra hircus OX=9925 GN=ACE2 PE=3 SV=1 - [A0A452EVM2_CAPHI]	0	0.94	4	1	1	1	0.875393	1		1.02826	1		1.14473	1		1.0422	1		1.05241	1		1.17119	1		1.08388	1		0.928053	1		0.955103	1		0.972669	1		0.999588	1		1.03183	1		0.932333	1		0.944193	1
A0A452GAV8	DnaJ heat shock protein family (Hsp40) member C6 OS=Capra hircus OX=9925 GN=DNAJC6 PE=4 SV=1 - [A0A452GAV8_CAPHI]	0	2.09	8	1	1	3	0.690681	3	21.4307	0.853123	3	12.7495	1.05965	3	9.28687	0.647037	3	41.3286	0.622607	3	6.1982	0.922441	3	26.8662	0.852663	3	80.0698	1.22408	3	7.03228	1.47275	3	12.0022	1.59025	3	1.61638	1.16768	3	24.9252	1.07356	3	76.8883	1.04635	3	22.845	1.33554	3	3.50268
A0A452E7B7	Cadherin 13 OS=Capra hircus OX=9925 GN=CDH13 PE=4 SV=1 - [A0A452E7B7_CAPHI]	0	1.81	5	1	1	2	1.06028	2	1.41077	0.987425	2	1.94469	0.952392	2	2.16194	1.06066	2	7.69547	1.09624	2	9.99857	0.934479	2	16.7871	1.05233	2	3.47775	1.02392	2	1.82556	0.954994	2	9.0737	1.03956	2	13.4505	1.05497	2	2.43235	0.970136	2	7.80832	0.963777	2	2.43661	0.978244	2	8.13461
A0A452GBB2	DNA replication licensing factor MCM7 OS=Capra hircus OX=9925 GN=MCM7 PE=3 SV=1 - [A0A452GBB2_CAPHI]	0	2.24	3	1	1	1	1.056	1		0.978178	1		1.05263	1		1.02478	1		1.0705	1		1.01763	1		0.949683	1		0.979664	1		0.997976	1		0.989695	1		0.889975	1		0.998554	1		1.0142	1		1.01791	1
A0A452E6H9	Solute carrier family 8 member A3 OS=Capra hircus OX=9925 GN=SLC8A3 PE=3 SV=1 - [A0A452E6H9_CAPHI]	0	1.09	8	1	1	2	0.719108	1		1.14944	1		1.17223	1		0.744123	1		1.1115	1		1.27759	1		0.80976	1		1.32421	1		0.789401	1		1.20887	1		1.25703	1		1.25884	1		0.723639	1		0.833519	1
A0A452E2D4	Dermatan sulfate epimerase OS=Capra hircus OX=9925 GN=DSE PE=3 SV=1 - [A0A452E2D4_CAPHI]	0	3.13	1	1	1	1	1.36389	1								1.9235	1		1.15399	1		1.46459	1		1.9022	1		2.14894	1		1.02403	1		1.62927	1											0.950374	1
A0A452EDN8	glutathione transferase OS=Capra hircus OX=9925 GN=LOC102185621 PE=3 SV=1 - [A0A452EDN8_CAPHI]	0	7.8	2	1	1	1	0.520043	1		1.46397	1		0.33659	1		0.501388	1		0.89396	1		1.1246	1		1.29829	1		1.06378	1		0.994149	1		1.34859	1		1.3083	1		1.0265	1		1.03193	1		1.04836	1
A0A452DKI0	Histamine receptor H4 OS=Capra hircus OX=9925 GN=HRH4 PE=3 SV=1 - [A0A452DKI0_CAPHI]	0	3.21	1	1	1	1	1.05727	1		1.03957	1		0.956315	1		0.991117	1		1.04794	1		0.817872	1		0.946218	1		0.886758	1		0.900978	1		1.04386	1		0.872393	1		1.0803	1		1.0669	1		1.11883	1
A0A452EU47	Actin, cytoplasmic 1 OS=Capra hircus OX=9925 GN=LOC102180084 PE=3 SV=1 - [A0A452EU47_CAPHI]	0	7.84	1	1	1	4	0.891943	3	19.7888	0.641394	3	52.2796	0.997354	3	41.7402	1.57327	3	23.593	0.907532	3	0.686624	1.31888	3	36.1345	0.827293	3	15.4249	1.19481	3	5.38344	1.55688	3	32.6494	0.917822	3	30.2845	0.853714	3	54.7329	0.770905	3	5.88979	0.93301	3	30.5327	0.619648	3	28.5417
A0A452FET3	Collagen type XXIV alpha 1 chain OS=Capra hircus OX=9925 GN=COL24A1 PE=4 SV=1 - [A0A452FET3_CAPHI]	0	0.89	5	1	1	1	0.916707	1		0.928998	1		0.865019	1		0.876749	1		0.971437	1		1.3114	1		1.18447	1		1.22439	1		1.28513	1		0.85246	1		1.2338	1		0.821304	1		0.805408	1		0.861049	1
A0A452EB94	Protein tyrosine phosphatase receptor type K OS=Capra hircus OX=9925 GN=PTPRK PE=4 SV=1 - [A0A452EB94_CAPHI]	0	0.69	4	1	1	1	0.958377	1		0.952352	1		0.975769	1		0.950408	1		0.996046	1		1.13085	1		1.06908	1		1.06199	1		1.01792	1		1.0284	1		1.11655	1		1.10135	1		0.87551	1		0.942126	1
A0A452EG50	Channel conductance-controlling ATPase OS=Capra hircus OX=9925 GN=LOC108637248 PE=4 SV=1 - [A0A452EG50_CAPHI]	0	0.47	1	1	1	2	1.23597	2	1.94511	1.24451	2	2.41088	1.23043	2	0.360174	1.30647	2	0.701243	1.22648	2	2.10843	1.09542	2	1.58571	1.06623	2	2.091	1.10116	2	1.65652	1.08656	2	2.68828	0.704463	2	1.9718	1.0935	2	1.94213	0.780068	2	2.47185	0.687487	2	4.039	0.747127	2	0.559616
A0A452ECK4	Cadherin 17 OS=Capra hircus OX=9925 GN=CDH17 PE=4 SV=1 - [A0A452ECK4_CAPHI]	0	1.92	1	1	1	1	0.660538	1		0.697349	1		0.671614	1		0.66725	1		0.640768	1		1.16064	1		1.19935	1		1.24376	1		1.18112	1		1.0466	1		1.21311	1		1.05333	1		1.19577	1		1.19638	1
A0A452FRI4	BTB domain-containing protein OS=Capra hircus OX=9925 GN=KLHL6 PE=4 SV=1 - [A0A452FRI4_CAPHI]	0	5.65	2	1	1	1	1.18483	1		1.24606	1		1.11184	1		1.16995	1		0.985119	1		0.913942	1		1.01037	1		0.981857	1		0.93054	1		1.02878	1		0.894413	1		1.03486	1		1.0683	1		0.764241	1
A0A452FGS5	Carboxylesterase type B domain-containing protein OS=Capra hircus OX=9925 GN=LOC108635379 PE=4 SV=1 - [A0A452FGS5_CAPHI]	0	2.17	5	1	1	1	1.0933	1		1.10227	1		1.12757	1		1.06827	1		1.08381	1		1.00807	1		0.997804	1		0.9951	1		0.986956	1		0.94651	1		0.991465	1		0.935771	1		0.980738	1		0.904789	1
A0A452DU15	ZXD family zinc finger C OS=Capra hircus OX=9925 GN=ZXDC PE=4 SV=1 - [A0A452DU15_CAPHI]	0	0.89	1	1	1	1	0.906438	1		0.867286	1		1.0223	1		1.02972	1		0.945614	1		0.846853	1		0.977898	1		0.913427	1		0.952999	1		1.08937	1		0.962924	1		1.18462	1		1.10645	1		1.14969	1
A0A452ETQ8	Myosin light chain 1 OS=Capra hircus OX=9925 GN=MYL1 PE=4 SV=1 - [A0A452ETQ8_CAPHI]	0	6	17	1	1	1	0.992344	1		1.0473	1		1.02872	1		1.06312	1		1.07875	1		1.01765	1		1.04305	1		0.981663	1		1.04655	1		0.915091	1		1.06252	1		0.922372	1		0.954541	1		1.01468	1
A0A452FL22	Semaphorin 4B OS=Capra hircus OX=9925 GN=SEMA4B PE=4 SV=1 - [A0A452FL22_CAPHI]	0	0.9	4	1	1	1	1.09659	1		0.815246	1		0.846207	1		0.984614	1		0.802681	1		0.974753	1		1.2621	1		0.977367	1		1.24422	1		0.815598	1		0.908553	1		0.856048	1		1.12824	1		1.20385	1
A0A452FKN8	Transketolase OS=Capra hircus OX=9925 GN=TKT PE=4 SV=1 - [A0A452FKN8_CAPHI]	0	1.44	1	1	1	1	1.24098	1		1.04205	1		1.03666	1		1.07147	1		1.09438	1		0.925254	1		0.929133	1		0.872107	1		0.907781	1		1.03167	1		0.88278	1		0.971485	1		0.940157	1		1.05312	1
A0A452FDP3	Perilipin OS=Capra hircus OX=9925 GN=PLIN5 PE=3 SV=1 - [A0A452FDP3_CAPHI]	0	2.63	2	1	1	1	1.06877	1		0.978974	1		1.02435	1		0.98968	1		1.01588	1		1.05149	1		1.02909	1		1.01154	1		1.14693	1		0.896809	1		1.03024	1		0.935754	1		0.909485	1		0.991651	1
A0A452G9K5	Keratin, type II cytoskeletal 1 OS=Capra hircus OX=9925 GN=KRT1 PE=3 SV=1 - [A0A452G9K5_CAPHI]	0	2.3	2	1	1	1	1.01367	1		1.01646	1		0.827724	1		0.637783	1		0.827996	1		0.883797	1		0.946079	1		0.910959	1		1.06214	1		0.97715	1		1.57183	1		0.635731	1		0.731929	1		2.17345	1
A0A452G536	Stathmin OS=Capra hircus OX=9925 GN=STMN3 PE=3 SV=1 - [A0A452G536_CAPHI]	0	2.82	11	1	1	1
A0A452F933	NGFI-A binding protein 2 OS=Capra hircus OX=9925 GN=NAB2 PE=3 SV=1 - [A0A452F933_CAPHI]	0	3.08	3	1	1	1	0.952201	1		0.856654	1		0.890886	1		0.947778	1		0.850888	1		1.21648	1		1.17131	1		1.21945	1		1.22605	1		0.974452	1		1.13829	1		0.936725	1		0.92789	1		0.900957	1
A0A452FFX5	Exocyst complex component 6B OS=Capra hircus OX=9925 PE=4 SV=1 - [A0A452FFX5_CAPHI]	0	3.4	1	1	1	1	1.00014	1		0.998878	1		0.94342	1		1.00932	1		1.01304	1		1.02744	1		1.00027	1		1.00551	1		0.99075	1		1.02593	1		0.948129	1		1.00259	1		1.01267	1		0.994809	1
A0A452E6B0	Ventral anterior homeobox 2 OS=Capra hircus OX=9925 GN=VAX2 PE=4 SV=1 - [A0A452E6B0_CAPHI]	0	2.1	2	1	1	1	0.669463	1		1.35982	1		1.34158	1		0.610349	1		1.29781	1		1.31666	1		0.597632	1		1.37808	1		0.610962	1		1.39462	1		1.34619	1		1.36434	1		0.587329	1		0.608713	1
A0A452E1F7	Ankyrin repeat domain 34B OS=Capra hircus OX=9925 GN=ANKRD34B PE=3 SV=1 - [A0A452E1F7_CAPHI]	0	4.88	1	1	1	1	1.07352	1		1.10974	1		1.08262	1		1.0948	1		1.18154	1		0.864935	1		0.909126	1		0.841311	1		0.83976	1		1.07337	1		0.998257	1		1.02402	1		1.08159	1		0.978825	1
A0A452FEH0	Dpy-19 like 4 OS=Capra hircus OX=9925 GN=DPY19L4 PE=3 SV=1 - [A0A452FEH0_CAPHI]	0	1.61	5	1	1	1	1.14575	1		1.09298	1		0.863676	1		0.849341	1		0.84627	1		0.766155	1		1.31512	1		1.24524	1		1.2248	1		1.16417	1		0.978072	1		0.918979	1		0.821367	1		0.899015	1
A0A452DNM6	Arp2/3 complex 34 kDa subunit OS=Capra hircus OX=9925 PE=3 SV=1 - [A0A452DNM6_CAPHI]	0	4.33	2	1	1	1	1.40581	1		1.26038	1		1.16198	1		1.26464	1		1.25208	1		0.802999	1		0.768014	1		0.723614	1		0.740862	1		1.01511	1		0.741782	1		0.996789	1		1.08708	1		1.06452	1
A0A452E482	WD repeat domain 3 OS=Capra hircus OX=9925 GN=WDR3 PE=4 SV=1 - [A0A452E482_CAPHI]	0	1.91	3	1	1	2	0.481128	2	19.0186	0.461632	2	14.1506	0.915425	2	0.166794	3.17218	2	9.31034	0.44756	2	13.2442	0.658344	2	4.55867	0.514626	2	5.50209	0.801371	2	16.9304	0.536763	2	21.0621	0.841087	2	1.09943	0.873109	2	9.09534	0.643374	2	4.80629	2.64281	2	6.89419	0.582372	2	2.61893
A0A452DKM8	RNA helicase OS=Capra hircus OX=9925 GN=DDX50 PE=3 SV=1 - [A0A452DKM8_CAPHI]	0	2.55	2	1	1	1	0.541537	1		0.97464	1		1.51083	1		0.732687	1		1.12926	1		1.18334	1		0.386039	1		1.20068	1		1.05479	1		1.75967	1		1.26997	1		1.33227	1		0.770199	1		0.356581	1
A0A452EFF4	OVOS protein OS=Capra hircus OX=9925 GN=LOC102175008 PE=3 SV=1 - [A0A452EFF4_CAPHI]	0	2.19	1	1	1	5	0.904374	3	60.553	1.19402	3	4.27961	0.95478	3	48.4702	1.11115	3	12.2305	0.628645	3	10.6831	1.42601	3	0.781687	1.44432	3	6.62812	1.20671	3	5.5401	1.37506	3	10.1286	0.927058	3	1.77009	1.09791	3	2.42167	0.740613	3	60.0158	0.648679	3	5.06525	0.806219	3	22.3906
A0A452DYK6	Dynein axonemal assembly factor 11 OS=Capra hircus OX=9925 GN=DNAAF11 PE=4 SV=1 - [A0A452DYK6_CAPHI]	0	2.96	2	1	1	1	0.39102	1		0.346063	1		0.264667	1		0.431966	1		0.385351	1		1.87233	1		1.82195	1		1.91288	1		1.91903	1		0.721843	1		1.87542	1		0.714758	1		0.805504	1		0.82115	1
A0A452DUW6	Aristaless related homeobox OS=Capra hircus OX=9925 GN=ARX PE=4 SV=1 - [A0A452DUW6_CAPHI]	0	3.94	2	1	1	1	0.99133	1		0.883635	1		0.866227	1		1.08304	1		0.894465	1		0.926935	1		1.02882	1		0.906439	1		1.33936	1		0.995925	1		0.96066	1		0.889878	1		1.09713	1		1.20514	1
A0A452FHI7	Tetraspanin OS=Capra hircus OX=9925 GN=CD63 PE=3 SV=1 - [A0A452FHI7_CAPHI]	0	4.22	4	1	1	1	1.01924	1		0.864583	1		1.01395	1		1.00007	1		0.927485	1		1.01794	1		1.03977	1		1.06848	1		1.0402	1		1.00713	1		0.995982	1		0.978619	1		1.03301	1		1.02508	1
A0A452E5V4	Alpha-1,6-mannosyl-glycoprotein 2-beta-N-acetylglucosaminyltransferase OS=Capra hircus OX=9925 GN=MGAT2 PE=3 SV=1 - [A0A452E5V4_CAPHI]	0	1.57	2	1	1	1	1.13187	1		1.12448	1		1.11666	1		1.06877	1		1.11647	1		0.916027	1		0.878592	1		0.929683	1		0.95952	1		1.00601	1		0.952841	1		0.924086	1		1.07402	1		1.04546	1
A0A452FWM4	Activated leukocyte cell adhesion molecule OS=Capra hircus OX=9925 GN=ALCAM PE=4 SV=1 - [A0A452FWM4_CAPHI]	0	1.58	5	1	1	1	0.924265	1		0.957346	1		0.945895	1		0.95037	1		0.961906	1		1.03156	1		1.02199	1		1.06877	1		1.03403	1		1.04769	1		1.07305	1		1.00877	1		1.04186	1		0.967918	1
A0A452DS19	Prostaglandin D2 synthase OS=Capra hircus OX=9925 GN=PTGDS PE=3 SV=1 - [A0A452DS19_CAPHI]	0	3.14	1	1	1	1	0.948885	1		0.908596	1		0.912435	1		1.05799	1		0.906686	1		1.08972	1		1.00073	1		1.01563	1		0.973026	1		1.03316	1		0.964152	1		1.00694	1		1.1118	1		1.01628	1
A0A452FXT0	Zinc finger RNA binding protein 2 OS=Capra hircus OX=9925 GN=ZFR2 PE=4 SV=1 - [A0A452FXT0_CAPHI]	0	3.4	3	1	1	1	0.910911	1		0.944129	1		0.800141	1		0.765023	1		0.722565	1		1.21345	1		1.3499	1		1.13332	1		1.14817	1		0.702122	1		1.46723	1		1.22682	1		0.905018	1		1.05914	1
A0A1I9WVP4	Protein Wnt OS=Capra hircus OX=9925 GN=WNT10B PE=2 SV=1 - [A0A1I9WVP4_CAPHI]	0	3.07	1	1	1	1	1.28152	1		1.13485	1		1.18386	1		1.14998	1		1.13421	1		0.934978	1		0.928099	1		1.07366	1		1.08797	1		1.06254	1		0.982621	1		1.00828	1		0.839545	1		0.68078	1
A0A452EKH0	UDP-glucose 4-epimerase OS=Capra hircus OX=9925 GN=GALE PE=3 SV=1 - [A0A452EKH0_CAPHI]	0	1.44	5	1	1	1	0.904172	1		0.901789	1		0.846368	1		0.91906	1		0.890737	1		1.02276	1		1.09627	1		1.07074	1		1.08469	1		1.02731	1		1.07743	1		1.07347	1		0.986294	1		1.10421	1
A0A452ESD1	Chromogranin A OS=Capra hircus OX=9925 GN=CHGA PE=3 SV=1 - [A0A452ESD1_CAPHI]	0	2.97	3	1	1	1	1.21118	1		0.805677	1		1.19934	1		0.985156	1		0.963924	1		0.869413	1		0.97363	1		0.853669	1		0.920826	1		0.981552	1		0.934471	1		1.3232	1		1.01497	1		1.01721	1
A0A452G1C7	DnaJ heat shock protein family (Hsp40) member A1 OS=Capra hircus OX=9925 PE=4 SV=1 - [A0A452G1C7_CAPHI]	0	1.68	2	1	1	1	1.60315	1		1.6329	1		1.66174	1		1.6639	1		1.5547	1		0.803266	1		0.870759	1		0.743413	1		0.792258	1		0.7256	1		0.801028	1		0.605523	1		0.625022	1		0.726702	1
A0A452E382	U3 small nucleolar RNA-associated protein 14 homolog A OS=Capra hircus OX=9925 GN=UTP14A PE=3 SV=1 - [A0A452E382_CAPHI]	0	0.65	1	1	1	1	1.15863	1		0.815153	1		1.49739	1		0.960502	1		1.23149	1		1.23755	1		1.03134	1		0.871323	1		0.804895	1		0.876304	1		1.09293	1		0.806854	1		1.08163	1		0.99158	1
A0A452FI43	Kelch like family member 38 OS=Capra hircus OX=9925 GN=KLHL38 PE=4 SV=1 - [A0A452FI43_CAPHI]	0	2.64	1	1	1	2	0.763255	2	16.5494	0.799238	2	2.11874	0.744276	2	16.4016	0.853856	2	27.0282	0.823581	2	4.07359	0.924902	2	0.366818	0.862151	2	6.44105	0.952835	2	6.46301	0.768522	2	2.4731	2.73571	2	10.092	0.879991	2	4.41264	0.835983	2	4.76113	1.38914	2	0.769066	0.752815	2	3.50168
A0A452EKY1	Ribosomal protein L15 OS=Capra hircus OX=9925 GN=LOC106503211 PE=3 SV=1 - [A0A452EKY1_CAPHI]	0	3.13	5	1	1	1	1.10008	1		0.973767	1		1.00394	1		0.934138	1		1.07763	1		1.15079	1		1.15641	1		1.01408	1		1.0697	1		0.948906	1		1.06528	1		0.875024	1		0.894757	1		0.958988	1
A0A452DYQ4	Zinc finger and BTB domain containing 10 OS=Capra hircus OX=9925 GN=ZBTB10 PE=4 SV=1 - [A0A452DYQ4_CAPHI]	0	2.2	4	1	1	1	0.870416	1		1.03066	1		1.12539	1		1.04547	1		0.992465	1		1.04425	1		0.918381	1		1.06313	1		0.922809	1		1.03682	1		1.09796	1		1.15608	1		0.948156	1		1.01053	1
A0A452FCJ9	Uncharacterized protein OS=Capra hircus OX=9925 PE=3 SV=1 - [A0A452FCJ9_CAPHI]	0	12.9	11	1	1	1	1.23131	1		1.24102	1		1.50359	1		1.2925	1		1.27379	1		1.21177	1		1.1812	1		0.97725	1		1.1108	1		0.712647	1		1.0881	1		0.564761	1		0.573261	1		0.81038	1
A0A452EFU0	Mitochondrial glutathione transporter SLC25A39 OS=Capra hircus OX=9925 PE=3 SV=1 - [A0A452EFU0_CAPHI]	0	5.42	2	1	1	1				1.57961	1		0.797025	1		0.621865	1		0.660302	1		0.423599	1		1.57038	1		1.52263	1		0.738757	1		1.38418	1		0.653545	1		1.67768	1		0.824626	1		1.15556	1
U5S0D4	Leukemia inhibitory factor receptor (Fragment) OS=Capra hircus OX=9925 GN=Lifr PE=2 SV=1 - [U5S0D4_CAPHI]	0	6.08	3	1	1	1	0.857997	1		0.789032	1		0.973133	1		1.07861	1		0.880601	1		0.828434	1		1.00325	1		1.27441	1		0.841951	1		1.07598	1		1.4039	1		0.833212	1		1.0004	1		1.08207	1
A4UTK6	Ovarian R-spondin member 2 (Fragment) OS=Capra hircus OX=9925 GN=RSPO2 PE=2 SV=1 - [A4UTK6_CAPHI]	0	6.94	4	1	1	1	0.808494	1		1.08603	1		0.945628	1		1.09066	1		1.13962	1		0.915968	1		1.05356	1		0.882706	1		1.04194	1		0.973008	1		1.08877	1		1.18271	1		0.945707	1		0.928413	1
A0A452EET3	Activator of basal transcription 1 OS=Capra hircus OX=9925 GN=ABT1 PE=3 SV=1 - [A0A452EET3_CAPHI]	0	6.18	2	1	1	1	1.44584	1		1.46946	1		1.37432	1		1.45389	1		1.42098	1		0.932618	1		0.92899	1		0.862845	1		0.865229	1		0.78327	1		0.902118	1		0.683708	1		0.711094	1		0.782601	1
A0A452EXE8	EF-hand domain-containing protein OS=Capra hircus OX=9925 GN=S100A9 PE=4 SV=1 - [A0A452EXE8_CAPHI]	0	6.62	2	1	1	1	1.02305	1		0.933317	1		0.953038	1		1.00119	1		1.01102	1		0.916588	1		0.966916	1		1.00124	1		0.957156	1		1.05103	1		1.04538	1		1.1025	1		1.10062	1		1.00573	1
A0A452G5Y6	Activator of HSP90 ATPase activity 1 OS=Capra hircus OX=9925 GN=AHSA1 PE=3 SV=1 - [A0A452G5Y6_CAPHI]	0	7.69	2	1	1	1	1.27582	1		1.45015	1		1.55373	1		1.19138	1		1.19019	1		0.635464	1		0.227121	1		1.02779	1		0.610814	1		1.15041	1		1.06147	1		0.884047	1		1.11192	1		0.994436	1
A0A452G6B2	HGF activator OS=Capra hircus OX=9925 GN=HGFAC PE=4 SV=1 - [A0A452G6B2_CAPHI]	0	3.32	3	1	1	3	0.829568	3	16.9205	1.11409	3	17.1871	1.14244	3	30.2103	0.873695	3	13.1986	1.01386	3	4.57106	1.2639	3	3.29568	0.883692	3	2.36255	1.17092	3	34.5473	1.00683	3	9.82412	0.917132	3	26.3818	1.17491	3	20.759	1.01071	3	5.4865	0.898691	3	10.4286	0.933387	3	12.2943
A0A452E1U5	Hydroxysteroid dehydrogenase like 2 OS=Capra hircus OX=9925 GN=HSDL2 PE=4 SV=1 - [A0A452E1U5_CAPHI]	0	1.67	6	1	1	1	1.00868	1		0.878221	1		1.04342	1		0.91207	1		0.926544	1		0.957816	1		1.12757	1		1.04924	1		1.12153	1		1.00577	1		1.07054	1		1.03647	1		1.02002	1		0.957509	1
A0A452E5U9	Zinc finger protein 248 OS=Capra hircus OX=9925 GN=ZNF248 PE=4 SV=1 - [A0A452E5U9_CAPHI]	0	1.57	2	1	1	1	1.04908	1		1.07184	1		1.01344	1		0.995067	1		1.02915	1		0.982048	1		1.10809	1		1.00123	1		0.994175	1		1.00228	1		1.00992	1		0.966659	1		1.04094	1		0.937083	1
A0A452G3L4	Islet cell autoantigen 1 OS=Capra hircus OX=9925 GN=ICA1 PE=4 SV=1 - [A0A452G3L4_CAPHI]	0	2.55	12	1	1	1	1.24198	1		1.01857	1		1.09272	1		1.04357	1		0.896925	1		0.95646	1		1.02954	1		1.19262	1		1.22935	1		1.07203	1		0.936404	1		0.921485	1		0.985532	1		0.823243	1
A0A452F6V7	Complement factor D OS=Capra hircus OX=9925 GN=CFD PE=4 SV=1 - [A0A452F6V7_CAPHI]	0	4.25	2	1	1	1	1.03332	1		0.779349	1		0.935994	1		1.03668	1		0.898473	1		1.11058	1		1.0988	1		1.06111	1		1.08025	1		0.972729	1		1.06955	1		0.987141	1		1.05653	1		1.05245	1
A0A8C2PAS4	Mothers against decapentaplegic homolog OS=Capra hircus OX=9925 GN=SMAD1 PE=3 SV=1 - [A0A8C2PAS4_CAPHI]	0	2.35	11	1	1	1	0.660331	1		1.31465	1		1.28544	1		0.602045	1		1.38396	1		0.552639	1		0.666383	1		1.25865	1		0.612997	1		1.32396	1		0.607954	1		1.53824	1		0.843675	1		1.13709	1
A0A452FUJ8	Fibrinogen like 2 OS=Capra hircus OX=9925 GN=FGL2 PE=4 SV=1 - [A0A452FUJ8_CAPHI]	0	8.16	2	2	2	5	1.03291	5	11.9742	1.00876	5	10.4703	0.98877	5	11.9771	1.05486	5	3.87566	1.09077	5	3.09562	0.92856	5	15.7891	1.05487	5	4.45075	0.93587	5	7.57571	0.932199	5	3.34754	0.960692	5	6.66938	0.966193	5	10.4146	0.987605	5	6.017	1.00718	5	5.78366	0.978628	5	10.3971
A0A452EJ90	Lecithin-cholesterol acyltransferase OS=Capra hircus OX=9925 GN=LCAT PE=3 SV=1 - [A0A452EJ90_CAPHI]	0	2.95	2	1	1	1	0.994686	1		0.985909	1		1.37838	1		1.0176	1		1.0603	1		0.98705	1		0.974016	1		0.876505	1		0.979131	1		1.04477	1		1.02403	1		0.914173	1		0.918281	1		1.04227	1
A0A452DRB2	Fibroblast activation protein alpha OS=Capra hircus OX=9925 GN=FAP PE=4 SV=1 - [A0A452DRB2_CAPHI]	0	3.14	8	2	2	3	1.07313	3	4.4721	1.14455	3	5.09847	1.04547	3	9.19579	1.00007	3	2.98387	1.04021	3	9.67814	0.986704	3	11.3546	0.996561	3	6.77454	0.995045	3	6.2138	1.06321	3	0.303056	0.974034	3	3.55129	0.999869	3	6.53685	0.965539	3	4.27946	1.01426	3	1.14466	0.986519	3	4.08262
A0A452DRS4	Sushi domain containing 1 OS=Capra hircus OX=9925 GN=SUSD1 PE=4 SV=1 - [A0A452DRS4_CAPHI]	0	1.02	9	1	1	1	0.768034	1		0.894615	1		0.864898	1		0.910135	1		0.911321	1		1.13446	1		1.08893	1		1.16126	1		1.07582	1		1.03263	1		1.18285	1		1.04522	1		1.02211	1		1.00349	1
A0A452EX75	Carboxypeptidase B2 OS=Capra hircus OX=9925 GN=CPB2 PE=3 SV=1 - [A0A452EX75_CAPHI]	0	3.91	4	2	2	3	1.12319	3	1.8611	0.88885	3	6.81291	1.01864	3	0.770216	0.921457	3	39.0483	0.97791	3	0.703474	1.03984	3	11.8315	0.990137	3	4.07154	1.02669	3	11.1181	1.10805	3	13.0825	0.923693	3	11.7062	1.10467	3	4.28274	0.951097	3	6.89339	0.985211	3	12.978	0.964691	3	4.48779
A0A452EWI3	Antagonist of mitotic exit network 1 homolog OS=Capra hircus OX=9925 GN=AMN1 PE=4 SV=1 - [A0A452EWI3_CAPHI]	0	2.82	3	1	1	1
A0A452DTX5	4-hydroxyphenylpyruvate dioxygenase OS=Capra hircus OX=9925 GN=HPD PE=3 SV=1 - [A0A452DTX5_CAPHI]	0	3.08	2	1	1	1	1.16409	1		1.16188	1		1.10232	1		1.1316	1		1.17128	1		0.959979	1		1.04058	1		0.990728	1		1.01075	1		0.923681	1		0.999768	1		0.892866	1		0.909042	1		0.873579	1
A0A452EDS3	Chromosome 7 open reading frame 31 OS=Capra hircus OX=9925 GN=C7orf31 PE=4 SV=1 - [A0A452EDS3_CAPHI]	0	1.88	3	1	1	1	1.08699	1		1.0015	1		0.92629	1		1.04983	1		0.933908	1		1.00218	1		1.10876	1		1.03983	1		1.13452	1		0.95172	1		1.05049	1		0.872023	1		0.991419	1		1.03411	1
A0A452F6F0	Cadherin 2 OS=Capra hircus OX=9925 GN=CDH2 PE=4 SV=1 - [A0A452F6F0_CAPHI]	0	2.74	2	1	1	1																			4.94301	1											3.37038	1		3.11828	1
A0A452DR09	pyridoxal 5'-phosphate synthase OS=Capra hircus OX=9925 GN=PNPO PE=3 SV=1 - [A0A452DR09_CAPHI]	0	5.75	2	1	1	2	0.971312	2	9.21044	0.952538	2	5.86224	1.08047	2	8.97363	0.979608	2	11.755	0.934104	2	0.270606	1.03242	2	10.1972	1.03901	2	10.4059	1.02768	2	1.79465	0.984003	2	19.9355	1.05504	2	2.16671	1.07621	2	1.23445	1.00469	2	5.77067	0.998484	2	8.77149	0.933382	2	7.86219
A0A452FX91	PKS_ER domain-containing protein OS=Capra hircus OX=9925 GN=LOC102177153 PE=3 SV=1 - [A0A452FX91_CAPHI]	0	4.4	4	1	1	1	0.974295	1		0.914585	1		1.00145	1		0.986925	1		1.02239	1		0.921162	1		1.00346	1		0.917191	1		0.935289	1		1.14229	1		1.05693	1		1.02756	1		1.06389	1		1.05053	1
A0A452FVU0	Zinc finger protein 605 OS=Capra hircus OX=9925 GN=ZNF605 PE=4 SV=1 - [A0A452FVU0_CAPHI]	0	3.12	2	1	1	2	1.05145	2	9.8356	1.02874	2	9.53571	0.982863	2	21.5961	1.2321	2	18.8575	0.926437	2	2.29802	0.826834	2	10.198	1.00727	2	14.5431	1.02006	2	2.45432	1.07231	2	5.65548	0.993353	2	15.6791	1.12097	2	10.3723	0.924552	2	5.09197	0.95999	2	19.6114	0.922611	2	0.849134
A0A452EPX5	Solute carrier family 24 member 4 OS=Capra hircus OX=9925 GN=SLC24A4 PE=3 SV=1 - [A0A452EPX5_CAPHI]	0	4.66	4	1	1	2	0.898198	1		0.965468	1		0.920477	1		1.09546	1		0.887219	1		0.867548	1		1.07515	1		0.984136	1		1.06996	1		1.06689	1		1.0943	1		0.887646	1		1.10526	1		1.08106	1
A0A8C2NWA7	RAB18, member RAS oncogene family OS=Capra hircus OX=9925 GN=RAB18 PE=4 SV=1 - [A0A8C2NWA7_CAPHI]	0	14.08	5	1	1	1	1.17107	1		1.21945	1		1.14223	1		0.913898	1		1.20381	1		0.635993	1		1.09182	1		0.741791	1		0.864918	1		0.855984	1		0.833048	1		1.24999	1		1.00372	1		0.918849	1
A0A452F2K0	Uncharacterized protein OS=Capra hircus OX=9925 PE=4 SV=1 - [A0A452F2K0_CAPHI]	0	18.89	2	1	1	1	0.821328	1		0.876629	1		1.00388	1		1.14268	1		0.783123	1		0.956998	1		1.31636	1		0.92326	1		1.06512	1		1.18012	1		0.885188	1		1.01057	1		0.885476	1		1.15735	1
A0A8C2QRN1	Peptidyl-prolyl cis-trans isomerase OS=Capra hircus OX=9925 GN=PPIH PE=3 SV=1 - [A0A8C2QRN1_CAPHI]	0	4.48	19	1	1	2	0.958751	2	3.87292	0.988424	2	10.1144	1.04441	2	8.73961	1.00913	2	2.7775	1.01655	2	18.1912	1.09543	2	3.07206	1.09705	2	1.09875	1.06974	2	0.663171	1.14164	2	1.9909	0.925135	2	7.69872	1.06542	2	1.88733	0.938994	2	12.5605	0.871068	2	15.9519	0.910957	2	2.59428
A0A452EGU8	Methyltransferase 5, N6-adenosine OS=Capra hircus OX=9925 GN=METTL5 PE=4 SV=1 - [A0A452EGU8_CAPHI]	0	2.39	4	1	1	1	1.11686	1		1.08933	1		1.08106	1		1.13667	1		1.07562	1		0.929319	1		0.912439	1		0.906541	1		0.886987	1		1.02709	1		0.915658	1		1.0089	1		1.03014	1		0.988709	1
A0A452F6V1	Immunoglobulin V-set domain-containing protein OS=Capra hircus OX=9925 PE=4 SV=1 - [A0A452F6V1_CAPHI]	0	7.02	2	1	1	1	1.11936	1		0.972842	1		0.99695	1		1.06698	1		1.08321	1		0.952916	1		0.906961	1		0.845542	1		0.941113	1		0.988767	1		0.86595	1		1.15412	1		1.03145	1		1.13378	1
A0A452E2A9	aminoacyl-tRNA hydrolase OS=Capra hircus OX=9925 GN=PTRH2 PE=4 SV=1 - [A0A452E2A9_CAPHI]	0	3.35	1	1	1	1	1.15056	1		0.601323	1		0.562125	1		1.27415	1		1.10387	1		1.08768	1		0.500309	1		1.08793	1		1.13565	1		1.12452	1		1.12508	1		0.978326	1		1.07372	1		1.23109	1
A0A0U2EXU9	NADH-ubiquinone oxidoreductase chain 4 OS=Capra hircus OX=9925 GN=ND4 PE=3 SV=1 - [A0A0U2EXU9_CAPHI]	0	3.49	1	1	1	3	0.990288	1		0.895046	1		1.02418	1		0.988437	1		0.902315	1		1.29842	1		1.0958	1		1.00217	1		1.09889	1		1.10817	1		1.08974	1		0.833228	1		1.01138	1		0.884405	1
A0A452FPG8	Peroxiredoxin 4 OS=Capra hircus OX=9925 GN=PRDX4 PE=4 SV=1 - [A0A452FPG8_CAPHI]	0	8.36	1	1	1	1	0.95948	1		1.38559	1		1.09508	1		0.875391	1		1.11191	1		0.971523	1		0.626972	1		0.998117	1		0.795574	1		1.22518	1		0.880253	1		1.28959	1		0.970668	1		0.954864	1
A0A452FJ25	Chromo domain-containing protein OS=Capra hircus OX=9925 PE=4 SV=1 - [A0A452FJ25_CAPHI]	0	19.57	1	1	1	1	1.08485	1		1.00096	1		0.881643	1		1.06324	1		0.988438	1		1.01096	1		0.94043	1		1.02962	1		1.01419	1		0.996565	1		0.949779	1		0.998042	1		1.05738	1		1.03788	1
A0A452EUI8	Apolipoprotein C-II OS=Capra hircus OX=9925 GN=APOC2 PE=3 SV=1 - [A0A452EUI8_CAPHI]	0	4.85	4	1	1	1	0.818034	1		0.747964	1		0.752892	1		0.792539	1		0.773474	1		1.27388	1		1.24686	1		1.23986	1		1.34361	1		0.946273	1		1.24405	1		0.981526	1		0.934115	1		0.946523	1
A0A452DKL9	NTF2-related export protein OS=Capra hircus OX=9925 GN=NXT2 PE=4 SV=1 - [A0A452DKL9_CAPHI]	0	6.34	3	1	1	1	0.946314	1		0.925918	1		0.929629	1		0.944165	1		0.921934	1		0.968673	1		0.926178	1		1.00868	1		0.943841	1		1.08213	1		0.878283	1		1.08169	1		1.13759	1		1.2067	1
A0A1W6BTK6	Insulin-like growth factor I (Fragment) OS=Capra hircus OX=9925 GN=IGF-1 PE=3 SV=1 - [A0A1W6BTK6_CAPHI]	0	23.33	12	1	1	1	1.27719	1		1.08252	1		1.28406	1		1.1966	1		1.23883	1		0.871043	1		0.896746	1		0.861835	1		0.913783	1		0.866283	1		0.888676	1		0.919497	1		0.97802	1		0.984532	1
A0A8C2SET5	Cadherin 11 OS=Capra hircus OX=9925 PE=4 SV=1 - [A0A8C2SET5_CAPHI]	0	1.77	3	1	1	1	1.03605	1		0.836792	1		1.39694	1		1.06808	1		1.03621	1		0.968744	1		0.91883	1		0.993936	1		0.983973	1		0.905228	1		0.910107	1		0.963496	1		0.991365	1		1.21662	1
A0A8C2PEL5	HECT-type E3 ubiquitin transferase OS=Capra hircus OX=9925 PE=4 SV=1 - [A0A8C2PEL5_CAPHI]	0	1.07	2	1	1	1	1.24176	1		0.955601	1		1.0669	1		1.01677	1		0.887995	1		1.01698	1		1.04173	1		1.08413	1		0.972172	1		0.98818	1		0.940023	1		0.973487	1		1.05345	1		0.928314	1
A0A8C2NSZ3	DNA replication licensing factor MCM4 OS=Capra hircus OX=9925 GN=MCM4 PE=3 SV=1 - [A0A8C2NSZ3_CAPHI]	0	1.5	28	1	2	2	1.05861	1		0.9991	1		1.01434	1		1.00945	1		0.953023	1		0.863605	1		0.902103	1		0.806533	1		0.901955	1		1.14027	1		0.908003	1		1.09925	1		1.15196	1		1.11976	1
A0A8C2NFB0	TRAF2 and NCK interacting kinase OS=Capra hircus OX=9925 PE=4 SV=1 - [A0A8C2NFB0_CAPHI]	0	0.9	2	1	1	1	0.974171	1		0.977097	1		1.01617	1		1.04831	1		0.962647	1		1.01164	1		1.18586	1		1.021	1		1.19726	1		0.913594	1		1.06008	1		0.911226	1		0.945295	1		0.954628	1
A0A8C2R8N1	Dynein axonemal heavy chain 10 OS=Capra hircus OX=9925 PE=3 SV=1 - [A0A8C2R8N1_CAPHI]	0	0.18	4	1	1	1	0.898056	1		0.800708	1		0.818953	1		0.949324	1		1.04797	1		0.869457	1		1.22496	1		0.930389	1		0.962684	1		0.933743	1		1.16614	1		1.14008	1		1.06756	1		1.02671	1
A0A8C2RQE7	Piccolo presynaptic cytomatrix protein OS=Capra hircus OX=9925 PE=4 SV=1 - [A0A8C2RQE7_CAPHI]	0	0.33	32	1	2	5	0.989058	4	5.65739	0.973903	4	0.69172	0.957009	4	3.47979	0.993176	4	3.27937	0.939567	4	2.49954	1.03422	4	3.83864	1.06616	4	1.93318	1.0404	4	2.94915	1.04285	4	4.53697	1.02724	4	0.45734	1.06121	4	2.90156	1.00011	4	2.39657	1.04492	4	2.54581	1.00098	4	0.54267
A0A8C2RHY9	Unconventional myosin-VI OS=Capra hircus OX=9925 PE=3 SV=1 - [A0A8C2RHY9_CAPHI]	0	1.33	9	1	1	1	0.91879	1		1.01175	1		0.792458	1		0.936482	1		1.11665	1		1.11283	1		1.13995	1		1.1715	1		0.959068	1		0.800485	1		0.921454	1		1.08608	1		1.11416	1		1.0744	1
A0A8C2RGQ1	Zinc finger ZZ-type and EF-hand domain containing 1 OS=Capra hircus OX=9925 PE=4 SV=1 - [A0A8C2RGQ1_CAPHI]	0	0.99	3	1	1	1	0.976758	1		0.969499	1		0.96825	1		0.91397	1		0.924677	1		0.998443	1		0.938326	1		1.05421	1		0.982321	1		1.19422	1		0.956206	1		0.885061	1		1.01399	1		1.20438	1
A0A8C2NDS5	Uncharacterized protein OS=Capra hircus OX=9925 PE=4 SV=1 - [A0A8C2NDS5_CAPHI]	0	3.66	1	1	1	1	0.834789	1		1.79197	1		0.750591	1		0.619861	1		0.360084	1		1.58887	1		0.341153	1		0.827611	1		0.743314	1		1.40247	1		0.840625	1		1.33884	1		1.05078	1		1.35373	1
A0A8C2NQ41	non-specific serine/threonine protein kinase OS=Capra hircus OX=9925 PE=3 SV=1 - [A0A8C2NQ41_CAPHI]	0	1.91	1	1	1	1	0.957498	1		1.00201	1		0.86327	1		1.00457	1		0.961717	1		0.995997	1		1.0487	1		0.984573	1		1.06821	1		0.972099	1		0.967899	1		1.10901	1		1.00349	1		1.04864	1
A0A8C2PMA4	Kelch like family member 25 OS=Capra hircus OX=9925 PE=4 SV=1 - [A0A8C2PMA4_CAPHI]	0	2	5	1	1	1	1.2992	1		1.23424	1		1.3165	1		1.21097	1		1.23623	1		0.881666	1		0.965747	1		0.83601	1		0.917093	1		0.898223	1		0.899744	1		0.844539	1		0.946535	1		0.87499	1
A0A8C2R0Z1	STAM binding protein like 1 OS=Capra hircus OX=9925 PE=3 SV=1 - [A0A8C2R0Z1_CAPHI]	0	1.64	3	1	1	4	0.993053	4	6.05022	0.972471	4	1.74714	0.959573	4	6.49998	0.956014	4	2.38055	0.944805	4	2.82904	1.018	4	5.42917	1.03472	4	3.15571	1.02961	4	0.332741	1.06796	4	4.69543	0.994441	4	1.81378	1.01819	4	3.01769	0.974305	4	5.76517	1.01227	4	4.33088	1.00275	4	5.2362
A0A8C2SJD7	Methyl-CpG binding domain protein 2 OS=Capra hircus OX=9925 PE=4 SV=1 - [A0A8C2SJD7_CAPHI]	0	1.5	1	1	1	1	1.03317	1		0.987265	1		0.986221	1		0.978399	1		0.970306	1		0.975204	1		1.01513	1		1.00834	1		1.04956	1		0.964664	1		0.998423	1		1.00429	1		1.00952	1		1.04888	1
A0A8C2S331	Sulfotransferase OS=Capra hircus OX=9925 PE=3 SV=1 - [A0A8C2S331_CAPHI]	0	3.14	1	1	1	1	0.890554	1		0.776152	1		0.722449	1		1.02098	1		0.661621	1		0.727325	1		0.949171	1		0.872887	1		0.724946	1		1.0276	1		1.28587	1		1.15546	1		1.40293	1		1.12561	1
A0A8C2PAL7	Insulin like growth factor binding protein 7 OS=Capra hircus OX=9925 PE=4 SV=1 - [A0A8C2PAL7_CAPHI]	0	4.68	3	1	1	1	1.24006	1		1.135	1		1.16807	1		1.34628	1		1.24011	1		1.16818	1		0.966738	1		1.04208	1		1.05725	1		0.759121	1		1.10007	1		0.666965	1		0.840006	1		0.770149	1
A0A8C2P9S3	B double prime 1, subunit of RNA polymerase III transcription initiation factor IIIB OS=Capra hircus OX=9925 PE=4 SV=1 - [A0A8C2P9S3_CAPHI]	0	0.23	3	1	1	1	1.04048	1		1.03962	1		1.00205	1		1.09083	1		1.02352	1		0.901605	1		0.991263	1		0.902584	1		0.902624	1		1.08259	1		0.972538	1		1.04219	1		1.07743	1		0.990088	1
A0A8C2SD95	Dynein axonemal heavy chain 17 OS=Capra hircus OX=9925 PE=3 SV=1 - [A0A8C2SD95_CAPHI]	0	0.43	8	1	1	1	0.820812	1		0.978738	1		0.890526	1		0.929584	1		0.835964	1		0.936093	1		0.939726	1		0.994831	1		0.945869	1		1.16809	1		0.978982	1		1.10085	1		1.1724	1		1.13268	1
A0A8C2NE81	RING-type E3 ubiquitin transferase OS=Capra hircus OX=9925 PE=4 SV=1 - [A0A8C2NE81_CAPHI]	0	1.01	9	1	1	1	1.29429	1		1.15124	1		0.907693	1		1.0261	1		0.92847	1		0.93398	1		0.908168	1		1.16183	1		1.15844	1		0.913585	1		0.950283	1		0.868864	1		1.08866	1		0.908264	1
A0A8C2NEV7	C2 calcium dependent domain containing 6 OS=Capra hircus OX=9925 PE=4 SV=1 - [A0A8C2NEV7_CAPHI]	0	0.55	1	1	1	1	1.33493	1		1.15019	1		1.26084	1		1.29016	1		1.22085	1		0.902209	1		0.962291	1		0.857117	1		0.970189	1		0.857915	1		0.899407	1		0.890808	1		0.951525	1		0.875211	1
A0A8C2R1N9	Chondroitin sulfate proteoglycan 4 OS=Capra hircus OX=9925 PE=4 SV=1 - [A0A8C2R1N9_CAPHI]	0	0.64	7	1	1	1	1.11622	1		0.980452	1		0.9989	1		1.09942	1		0.903904	1		0.991392	1		1.02326	1		1.07703	1		0.940715	1		1.03604	1		0.990484	1		0.969617	1		1.04784	1		0.942724	1
A0A8C2R1I4	ATP binding cassette subfamily A member 12 OS=Capra hircus OX=9925 PE=4 SV=1 - [A0A8C2R1I4_CAPHI]	0	0.49	4	1	1	2	1.02549	2	1.05051	1.02254	2	3.03051	0.982272	2	5.45832	0.998092	2	4.85689	0.95387	2	9.61165	0.979075	2	8.77812	1.02922	2	1.88542	1.03265	2	10.4104	1.0915	2	8.63416	0.983751	2	6.4243	1.02263	2	1.21634	1.00285	2	5.28761	1.01257	2	7.47714	0.95783	2	9.91718
A0A8C2Y3F6	Cilia and flagella associated protein 43 OS=Capra hircus OX=9925 PE=4 SV=1 - [A0A8C2Y3F6_CAPHI]	0	1.38	4	1	1	1	0.984599	1		0.833492	1		1.00056	1		0.880235	1		0.975336	1		0.996043	1		0.958557	1		1.14384	1		1.06486	1		1.00063	1		0.958389	1		1.00233	1		1.03114	1		1.13741	1
A0A8C2SF74	Spectrin repeat containing nuclear envelope protein 2 OS=Capra hircus OX=9925 PE=3 SV=1 - [A0A8C2SF74_CAPHI]	0	0.15	17	1	2	2
A0A8C2PAP0	Tetratricopeptide repeat and ankyrin repeat containing 1 OS=Capra hircus OX=9925 PE=4 SV=1 - [A0A8C2PAP0_CAPHI]	0	0.28	5	1	1	1	0.874287	1		0.912774	1		0.979374	1		1.00059	1		0.958353	1		1.06205	1		1.0838	1		1.01397	1		0.988954	1		1.09974	1		1.02484	1		0.973106	1		1.10392	1		1.00278	1
A0A8C2QQ74	Sulfite oxidase OS=Capra hircus OX=9925 PE=4 SV=1 - [A0A8C2QQ74_CAPHI]	0	1.02	10	1	1	1
A0A8C2RY74	Pleckstrin homology and RhoGEF domain containing G5 OS=Capra hircus OX=9925 PE=4 SV=1 - [A0A8C2RY74_CAPHI]	0	1.88	9	1	1	1	0.979314	1		0.97826	1		0.879423	1		1.01257	1		0.930023	1		1.03765	1		1.07413	1		0.986486	1		1.08075	1		0.955892	1		1.07742	1		1.0178	1		1.01252	1		1.01545	1
A0A8C2PG91	Thyroglobulin OS=Capra hircus OX=9925 PE=3 SV=1 - [A0A8C2PG91_CAPHI]	0	0.87	12	2	2	2	1.0117	2	4.24887	0.936545	2	4.23524	0.943626	2	8.24069	1	2	4.09576	0.948168	2	7.46196	1.08391	2	1.91368	1.06744	2	9.52955	1.09442	2	11.9191	1.08882	2	5.98273	0.949099	2	3.88939	1.02973	2	6.52856	0.954575	2	10.7065	1.0178	2	2.62502	0.948758	2	5.18189
A0A8C2P8V5	Transmembrane protein 127 OS=Capra hircus OX=9925 GN=TMEM127 PE=4 SV=1 - [A0A8C2P8V5_CAPHI]	0	2.24	7	1	1	1
A0A8C2S8P1	Histone domain-containing protein OS=Capra hircus OX=9925 PE=3 SV=1 - [A0A8C2S8P1_CAPHI]	0	4.5	15	1	1	1
A0A8C2PEP4	Keratin 10 OS=Capra hircus OX=9925 PE=3 SV=1 - [A0A8C2PEP4_CAPHI]	0	3.46	17	2	2	2	1.06344	2	4.3849	1.02373	2	7.91326	1.08417	2	9.7508	1.02889	2	0.892569	0.982809	2	2.21774	1.02114	2	15.7741	0.951804	2	2.31093	0.959287	2	12.2256	0.989107	2	14.8864	0.970075	2	6.27858	1.03881	2	0.434966	0.927481	2	3.67161	1.02793	2	6.28182	1.03525	2	2.99773
A0A8C2N6N9	1,4-alpha-glucan branching enzyme OS=Capra hircus OX=9925 PE=3 SV=1 - [A0A8C2N6N9_CAPHI]	0	2.26	4	1	1	1	1.17046	1		1.13638	1		1.43512	1		1.15801	1		1.03251	1		1.00787	1		0.99613	1		1.4006	1		1.32129	1		0.972784	1		1.30577	1		0.917706	1		0.317637	1		0.611857	1
A0A8C2RE52	Midasin AAA ATPase 1 OS=Capra hircus OX=9925 PE=4 SV=1 - [A0A8C2RE52_CAPHI]	0	0.64	5	2	2	4	1.16631	3	6.11313	1.12396	3	13.2047	0.819973	3	30.4516	0.805126	3	28.7364	0.803417	3	5.05076	0.969584	3	12.5546	0.890138	3	5.03092	0.844496	3	15.3939	1.04044	3	0.293261	0.964003	3	4.63242	1.31071	3	23.4585	0.735933	3	13.4993	0.81191	3	34.2162	2.09152	3	29.7696
A0A8C2RRG0	Target of EGR1, exonuclease OS=Capra hircus OX=9925 PE=3 SV=1 - [A0A8C2RRG0_CAPHI]	0	7.48	2	1	1	1	1.53564	1		1.02635	1		1.23018	1		1.00596	1		0.89463	1		1.18323	1		0.89289	1		0.980169	1		1.28939	1		0.878474	1		0.810994	1		1.11263	1		0.883942	1		0.768561	1
A0A8C2SBH2	Partner and localizer of BRCA2 OS=Capra hircus OX=9925 PE=4 SV=1 - [A0A8C2SBH2_CAPHI]	0	2.48	27	2	2	4	0.981506	2	16.9101	0.979473	2	15.0757	0.823036	2	26.3372	1.09121	2	20.2066	0.92638	2	8.57472	1.01556	2	3.97542	1.08835	2	5.20996	1.08517	2	7.86179	1.05871	2	20.4196	0.992558	2	2.59822	1.08483	2	26.4323	0.828209	2	8.69407	0.992239	2	17.6285	0.981399	2	9.37457
A0A8C2RBJ1	Centrosomal protein 295 OS=Capra hircus OX=9925 PE=4 SV=1 - [A0A8C2RBJ1_CAPHI]	0	0.39	3	1	1	1				1.91057	1																	2.79293	1		2.6836	1		1.97207	1											2.54375	1
A0A8C2RCT2	Protein kinase domain-containing protein OS=Capra hircus OX=9925 PE=3 SV=1 - [A0A8C2RCT2_CAPHI]	0	2.22	5	1	1	2	1.03465	2	21.119	0.875382	2	8.89715	1	2	28.9481	0.829904	2	3.8072	1.12504	2	18.1737	1.16531	2	11.1231	1.07783	2	14.7793	1.13705	2	0.0151534	1.07431	2	9.10962	1.05582	2	15.8757	0.920694	2	12.1328	1.04141	2	12.4124	0.88147	2	0.199585	0.832224	2	14.5664
A0A8C2P0K2	Phosphoinositide phospholipase C OS=Capra hircus OX=9925 PE=4 SV=1 - [A0A8C2P0K2_CAPHI]	0	1.36	7	1	1	1	0.974437	1		0.884992	1		1.04512	1		0.907045	1		1.04921	1		1.05829	1		1.00637	1		1.01545	1		1.04168	1		1.00079	1		1.00836	1		1.05183	1		1.03432	1		1.00952	1
A0A8C2N861	Exonuclease V OS=Capra hircus OX=9925 GN=LOC102185625 PE=4 SV=1 - [A0A8C2N861_CAPHI]	0	3.01	5	1	1	1	0.918814	1		0.989082	1		0.878931	1		0.956971	1		0.972667	1		0.987463	1		1.01122	1		0.937184	1		1.07027	1		0.972048	1		0.97713	1		1.11696	1		1.01816	1		1.17097	1
A0A8C2SJ94	Sodium/potassium-transporting ATPase subunit alpha OS=Capra hircus OX=9925 PE=3 SV=1 - [A0A8C2SJ94_CAPHI]	0	1.42	1	1	1	1	0.952843	1		1.01199	1		0.872297	1		1.03646	1		0.978336	1		0.953788	1		0.907688	1		0.939493	1		0.945968	1		1.09631	1		0.88481	1		1.07407	1		1.14337	1		1.14302	1
A0A8C2NEQ4	Lengsin, lens protein with glutamine synthetase domain OS=Capra hircus OX=9925 GN=LGSN PE=3 SV=1 - [A0A8C2NEQ4_CAPHI]	0	1.77	1	1	1	1	0.81184	1		1.11768	1		1.37464	1		0.874111	1		1.18922	1		1.07339	1		0.873054	1		0.945202	1		0.805709	1		1.06277	1		1.13453	1		1.16609	1		0.901149	1		0.825015	1
A0A8C2S224	Protein tyrosine phosphatase receptor type Z1 OS=Capra hircus OX=9925 PE=3 SV=1 - [A0A8C2S224_CAPHI]	0	0.9	10	1	1	1	1.15906	1		1.05218	1		1.15404	1		1.10143	1		1.06224	1		0.980212	1		0.930954	1		0.853256	1		0.909742	1		1.00296	1		1.01494	1		0.986575	1		0.960934	1		1.02787	1
A0A8C2QVE1	Intraflagellar transport 172 OS=Capra hircus OX=9925 PE=4 SV=1 - [A0A8C2QVE1_CAPHI]	0	1.18	5	1	1	1	0.952773	1		0.957905	1		1.18598	1		0.978978	1		0.876456	1		1.10283	1		1.24881	1		0.75396	1		0.946966	1		1.15227	1		0.9929	1		0.570326	1		1.10162	1		1.23148	1
A0A8C2SJP7	Synaptonemal complex central element protein 2 OS=Capra hircus OX=9925 GN=SYCE2 PE=4 SV=1 - [A0A8C2SJP7_CAPHI]	0	12.04	2	1	1	3	1.16254	2	5.15039	1.13864	2	4.86685	0.906762	2	9.20014	0.947069	2	10.9363	1.15836	2	0.852874	1.01108	2	29.2036	0.983814	2	9.34041	0.946388	2	0.935613	0.906444	2	16.8193	0.846295	2	14.6838	0.975058	2	3.90709	0.967295	2	16.7565	1.03179	2	10.1781	1.00277	2	6.77063
A0A8C2SEP1	hexokinase OS=Capra hircus OX=9925 PE=3 SV=1 - [A0A8C2SEP1_CAPHI]	0	1.6	12	1	1	1	1.06143	1		0.952058	1		1.02186	1		1.04731	1		1.02279	1		0.894208	1		1.00618	1		1.03025	1		0.912675	1		0.954347	1		1.04542	1		1.00696	1		0.982028	1		1.12009	1
A0A8C2SFE5	Signal peptidase complex catalytic subunit SEC11 OS=Capra hircus OX=9925 PE=3 SV=1 - [A0A8C2SFE5_CAPHI]	0	2.94	8	1	1	1
A0A8C2NDS7	Transferrin receptor protein 1 OS=Capra hircus OX=9925 PE=3 SV=1 - [A0A8C2NDS7_CAPHI]	0	1.25	9	1	1	1	0.95003	1		0.855465	1		0.888382	1		0.967223	1		0.970556	1		1.04347	1		1.12351	1		0.999792	1		1.01895	1		1.04947	1		1.0361	1		1.0705	1		0.98683	1		1.08079	1
A0A8C2S729	LIM zinc-binding domain-containing protein OS=Capra hircus OX=9925 PE=4 SV=1 - [A0A8C2S729_CAPHI]	0	2.34	18	1	1	1
A0A8C2Y2Y7	MAX dimerization protein MGA OS=Capra hircus OX=9925 PE=4 SV=1 - [A0A8C2Y2Y7_CAPHI]	0	0.32	6	1	1	5	1.36307	5	4.19738	1.23747	5	1.23014	1.2948	5	1.16853	1.30689	5	3.07745	1.21643	5	5.95071	1.1002	5	7.88409	1.07347	5	3.54803	1.07843	5	4.40842	1.07958	5	7.24762	0.701604	5	3.44917	1.06301	5	4.06436	0.724105	5	3.46696	0.708391	5	13.8205	0.733615	5	1.23343
A0A8C2P606	Phosphomannomutase OS=Capra hircus OX=9925 PE=3 SV=1 - [A0A8C2P606_CAPHI]	0	3.13	3	1	1	1	0.673073	1		1.24711	1		1.26762	1		0.741356	1		1.32211	1		1.47845	1		0.716315	1		1.45951	1		0.713822	1		1.14574	1		1.39759	1		1.1301	1		0.611919	1		0.605196	1
A0A8C2R5Z4	3'-phosphoadenosine 5'-phosphosulfate synthase 2 OS=Capra hircus OX=9925 PE=3 SV=1 - [A0A8C2R5Z4_CAPHI]	0	0.87	5	1	1	1	0.952183	1		0.894814	1		0.920565	1		0.904141	1		0.993462	1		0.953738	1		0.980434	1		0.956871	1		0.999068	1		1.11041	1		0.944047	1		1.10842	1		1.0399	1		1.08227	1
A0A8C2NM51	Tropomyosin 1 OS=Capra hircus OX=9925 PE=3 SV=1 - [A0A8C2NM51_CAPHI]	0	8.65	8	1	1	1	1.93283	1		1.83648	1		1.85569	1		1.91255	1		1.89691	1		0.72982	1		0.732545	1		0.654768	1		0.720394	1		0.512812	1		0.668427	1		0.51871	1		0.527043	1		0.532229	1
A0A8C2NQT4	Ig-like domain-containing protein OS=Capra hircus OX=9925 PE=4 SV=1 - [A0A8C2NQT4_CAPHI]	0	8.82	2	2	2	3	1.24278	3	1.85789	1.14565	3	13.8474	1.12603	3	11.7764	1.18752	3	15.978	1.17654	3	0.502152	0.984755	3	4.04086	0.980823	3	2.93521	1.00796	3	1.21414	0.977909	3	5.00095	0.917843	3	3.88971	1	3	9.94159	0.84867	3	23.5624	0.986118	3	1.02599	0.870155	3	5.42401
A0A8C2P2D0	Acetyl-CoA acetyltransferase 2 OS=Capra hircus OX=9925 PE=3 SV=1 - [A0A8C2P2D0_CAPHI]	0	1.52	2	1	1	1	1.08822	1		1.05252	1		1.07593	1		1.12963	1		1.10178	1		1.03595	1		1.11505	1		1.0908	1		1.11425	1		0.838722	1		1.05224	1		0.877187	1		0.869088	1		0.902269	1
A0A8C2QQS2	PPARG coactivator 1 alpha OS=Capra hircus OX=9925 PE=4 SV=1 - [A0A8C2QQS2_CAPHI]	0	0.94	8	1	1	1	0.839278	1		1.05222	1		0.992957	1		0.951168	1		1.19711	1		0.882458	1		0.81882	1		1.47735	1		1.20322	1		0.866788	1		1.00232	1		1.16197	1		0.870278	1		0.806279	1
A0A8C2P0K5	Phospholipid-transporting ATPase OS=Capra hircus OX=9925 PE=3 SV=1 - [A0A8C2P0K5_CAPHI]	0	2.07	5	1	1	1	1.25695	1		1.22234	1		1.16038	1		1.21975	1		1.22255	1		0.816713	1		0.886215	1		0.844067	1		0.820458	1		0.938737	1		0.906136	1		0.932848	1		1.00012	1		0.970104	1
A0A8C2XWJ8	ATPase secretory pathway Ca2+ transporting 1 OS=Capra hircus OX=9925 PE=4 SV=1 - [A0A8C2XWJ8_CAPHI]	0	1.38	9	1	1	2	0.782567	2	57.3535	1.02706	2	31.4905	1.0432	2	40.4933	0.812194	2	42.8954	1.03906	2	42.2065	1.0363	2	23.4748	0.815162	2	48.9799	1.094	2	31.1166	0.864125	2	55.8158	1.12683	2	49.3888	1.03446	2	21.2438	1.16262	2	39.5976	0.846604	2	49.6187	0.872487	2	52.8278
A0A8C2NHE9	Retroelement silencing factor 1 OS=Capra hircus OX=9925 PE=4 SV=1 - [A0A8C2NHE9_CAPHI]	0	0.38	5	1	1	1	0.52517	1		1.2992	1		1.57284	1		0.657513	1		1.33261	1		1.3194	1		0.648257	1		1.32382	1		0.601843	1		1.4913	1		1.39664	1		1.13722	1		0.617143	1		0.638928	1
A0A8C2PFJ0	Zinc finger protein 606 OS=Capra hircus OX=9925 PE=4 SV=1 - [A0A8C2PFJ0_CAPHI]	0	4.21	2	1	1	1	1.27087	1		1.04098	1		0.774062	1		1.10872	1		1.03724	1		0.911314	1		0.952359	1		1.07436	1		0.91578	1		1.01833	1		1.06611	1		0.897929	1		1.17347	1		0.97096	1
A0A8C2RJK8	Platelet-activating factor acetylhydrolase OS=Capra hircus OX=9925 PE=4 SV=1 - [A0A8C2RJK8_CAPHI]	0	1.43	4	1	1	1	0.863299	1		0.831954	1		0.845743	1		0.866952	1		0.799095	1		1.12918	1		1.10139	1		1.10342	1		1.1556	1		1.00403	1		1.2035	1		1.02387	1		1.02117	1		1.0641	1
A0A8C2XTW5	proton-translocating NAD(P)(+) transhydrogenase OS=Capra hircus OX=9925 PE=3 SV=1 - [A0A8C2XTW5_CAPHI]	0	2.73	3	1	1	2	1.04822	1		1.2372	1		1.15946	1		0.914411	1		0.831767	1		0.907704	1		0.832796	1		0.894212	1		0.950111	1		1.1979	1		1.07376	1		1.04593	1		1.00838	1		1.18105	1
A0A8C2N9J4	Kinesin-like protein OS=Capra hircus OX=9925 PE=3 SV=1 - [A0A8C2N9J4_CAPHI]	0	2.01	6	1	1	1	0.750004	1		0.719218	1		0.732338	1		0.716609	1		0.733967	1		1.35984	1		1.33957	1		1.32615	1		1.40791	1		0.877813	1		1.35954	1		1.00382	1		0.912641	1		0.893614	1
A0A8C2NMS8	BZIP domain-containing protein OS=Capra hircus OX=9925 GN=NFE2L2 PE=4 SV=1 - [A0A8C2NMS8_CAPHI]	0	1.02	5	1	1	10	1.09805	3	2.76479	0.891296	3	1.11869	0.982404	3	9.02628	1.06278	3	2.24905	0.946663	3	0.905622	0.971245	3	0.265344	1.0144	3	4.45983	1.01349	3	5.31032	0.942982	3	4.13963	1.0506	3	2.68625	0.880127	3	0.809377	0.973348	3	1.9807	1.08543	3	1.45634	1.0542	3	11.5206
A0A8C2QQV1	Elongation factor G, mitochondrial OS=Capra hircus OX=9925 GN=MLF1 PE=3 SV=1 - [A0A8C2QQV1_CAPHI]	0	0.86	8	1	1	1	0.722672	1		1.21164	1		1.2487	1		0.683437	1		1.15223	1		1.19178	1		0.715718	1		1.29081	1		0.888506	1		1.35204	1		1.24951	1		1.34499	1		0.667005	1		0.726287	1
A0A8C2NDV3	Inhibitor of growth protein N-terminal histone-binding domain-containing protein OS=Capra hircus OX=9925 PE=4 SV=1 - [A0A8C2NDV3_CAPHI]	0	4.03	2	1	1	1	1.23129	1		1.24076	1		1.29594	1		1.28814	1		1.24404	1		0.847434	1		0.874341	1		0.827008	1		0.857163	1		0.930722	1		0.849943	1		0.938875	1		0.927998	1		0.914149	1
A0A8C2RYJ3	Protocadherin related 15 OS=Capra hircus OX=9925 PE=4 SV=1 - [A0A8C2RYJ3_CAPHI]	0	1.83	3	1	1	1	1.03899	1		1.03173	1		0.973753	1		0.782834	1		1.39331	1		0.84252	1		0.983116	1		1.1829	1		1.08898	1		1.01784	1		0.90294	1		0.950657	1		0.863195	1		0.98422	1
A0A8C2RZ81	Cadherin 1 OS=Capra hircus OX=9925 PE=4 SV=1 - [A0A8C2RZ81_CAPHI]	0	2.43	6	2	2	2	0.862166	2	1.26351	0.924944	2	4.58221	0.929896	2	9.2226	0.98901	2	15.8774	0.92731	2	10.3923	0.935467	2	5.02536	0.980579	2	3.96243	0.906975	2	1.93259	0.954644	2	5.64211	1.13899	2	2.87588	0.968573	2	2.21589	1.07687	2	9.20429	1.16061	2	8.68068	1.11299	2	10.4046
A0A8C2XWP7	Switching B cell complex subunit SWAP70 OS=Capra hircus OX=9925 PE=4 SV=1 - [A0A8C2XWP7_CAPHI]	0	3.86	3	1	1	2	0.716184	2	60.8478	1.07224	2	3.31902	1.07627	2	12.0171	0.874033	2	28.6449	1.22372	2	6.87666	1.00147	2	12.5739	0.901627	2	38.209	1.05385	2	13.4457	0.907388	2	39.7494	0.883362	2	20.8846	1.12024	2	0.476179	1.05716	2	1.22944	0.833548	2	14.9923	1.10741	2	4.50587
A0A8C2QZS7	Interferon induced protein with tetratricopeptide repeats 3 OS=Capra hircus OX=9925 GN=IFIT3 PE=4 SV=1 - [A0A8C2QZS7_CAPHI]	0	5.64	4	1	1	1	0.95118	1		1.14909	1		0.890776	1		0.952104	1		0.967754	1		1.24797	1		0.926794	1		1.02426	1		0.88558	1		0.856053	1		1.06113	1		1.27851	1		0.911342	1		0.751732	1
A0A8C2R6T5	Cyclic nucleotide-binding domain-containing protein OS=Capra hircus OX=9925 PE=4 SV=1 - [A0A8C2R6T5_CAPHI]	0	1.74	3	1	1	1	1.14031	1		1.20591	1		1.11159	1		1.19621	1		1.20865	1		0.960077	1		1.0017	1		0.847639	1		0.945253	1		0.889338	1		0.898432	1		0.93647	1		0.947197	1		0.948809	1
A0A8C2REC2	Filamin A interacting protein 1 OS=Capra hircus OX=9925 PE=4 SV=1 - [A0A8C2REC2_CAPHI]	0	0.63	2	1	1	1	0.898725	1		0.941825	1		1.01514	1		1.06689	1		0.955229	1		0.975381	1		1.08095	1		0.953632	1		0.998206	1		1.02734	1		0.974579	1		1.01478	1		1.03054	1		1.06574	1
A0A8C2QZ50	Brain enriched myelin associated protein 1 OS=Capra hircus OX=9925 PE=4 SV=1 - [A0A8C2QZ50_CAPHI]	0	2.26	1	1	1	1	0.997967	1		0.978887	1		1.03115	1		1.0003	1		0.910282	1		1.099	1		1.116	1		1.12388	1		1.19437	1		0.857958	1		1.14127	1		0.882708	1		0.986238	1		0.914396	1
A0A8C2NYW9	Plexin A4 OS=Capra hircus OX=9925 PE=4 SV=1 - [A0A8C2NYW9_CAPHI]	0	1.31	6	1	1	2	0.916873	2	61.2361	1.2319	2	34.652	1.16076	2	38.8093	1.03595	2	50.2146	1.13062	2	37.8025	0.960383	2	41.0062	0.84264	2	41.2496	0.917358	2	37.7792	0.789776	2	49.1126	0.97661	2	34.6464	0.872787	2	41.6939	1.13038	2	35.0245	0.91849	2	54.9638	0.86313	2	55.7058
A0A8C2Y4A7	Dystroglycan 1 OS=Capra hircus OX=9925 PE=4 SV=1 - [A0A8C2Y4A7_CAPHI]	0	1.31	4	1	1	1	1.05351	1		1.04899	1		0.982802	1		1.11711	1		1.01819	1		1.01446	1		1.09073	1		1.03137	1		1.05438	1		0.834972	1		0.964241	1		0.932936	1		1.03452	1		0.97738	1
A0A8C2NZF1	Caspase 8 associated protein 2 OS=Capra hircus OX=9925 PE=4 SV=1 - [A0A8C2NZF1_CAPHI]	0	1.8	4	1	1	1	1.00787	1		0.992784	1		1.2569	1		1.23876	1		1.29609	1		1.0007	1		1.20673	1		0.852215	1		0.62369	1		1.09653	1		0.705889	1		0.866725	1		1.05623	1		0.987538	1
A0A8C2R9X1	Tubulin_C domain-containing protein OS=Capra hircus OX=9925 PE=3 SV=1 - [A0A8C2R9X1_CAPHI]	0	2.86	11	1	1	1	0.862727	1		0.916229	1		0.949908	1		0.95377	1		0.913002	1		1.12429	1		1.16528	1		1.1587	1		1.14299	1		0.916248	1		1.13213	1		0.896859	1		0.947382	1		0.986656	1
A0A8C2P0K9	TERF1 interacting nuclear factor 2 OS=Capra hircus OX=9925 PE=4 SV=1 - [A0A8C2P0K9_CAPHI]	0	2.81	1	1	1	1	1.02445	1		0.938045	1		0.90979	1		0.910443	1		0.973118	1		0.959638	1		0.97308	1		1.06622	1		1.14611	1		1.05043	1		1.04242	1		0.875348	1		1.07854	1		1.03122	1
A0A8C2NJY9	Shugoshin 2 OS=Capra hircus OX=9925 PE=3 SV=1 - [A0A8C2NJY9_CAPHI]	0	4.49	4	1	1	1	1.05224	1		0.797432	1		0.902901	1		0.944819	1		0.87403	1		1.00024	1		0.932779	1		1.01096	1		0.962414	1		1.13977	1		1.0557	1		1.02687	1		1.16208	1		1.13565	1
A0A8C2NTN2	IQ motif and Sec7 domain ArfGEF 3 OS=Capra hircus OX=9925 PE=4 SV=1 - [A0A8C2NTN2_CAPHI]	0	2.73	5	1	1	1	0.788623	1		0.96279	1		1.01632	1		1.01312	1		0.946305	1		0.986457	1		0.97028	1		1.25029	1		0.768774	1		1.28747	1		1.05228	1		1.13902	1		1.0803	1		0.924333	1
A0A8C2P0G9	C2 domain-containing protein OS=Capra hircus OX=9925 PE=4 SV=1 - [A0A8C2P0G9_CAPHI]	0	5.71	3	1	1	1	1.53291	1		1.02044	1					1.40395	1		0.982293	1		1.56396	1		1.15414	1		1.2482	1		1.41881	1		1.41431	1								0.882608	1		1.55964	1
A0A8C2SC15	Centrosomal protein 250 OS=Capra hircus OX=9925 PE=4 SV=1 - [A0A8C2SC15_CAPHI]	0	0.45	6	1	1	2	0.955599	2	9.41867	1.02522	2	2.16914	1.03947	2	3.23004	0.972962	2	22.3986	0.943575	2	7.28812	0.99884	2	14.6777	1.03077	2	9.27594	1.05435	2	0.572718	1.05375	2	3.04343	0.976842	2	0.201851	1.05835	2	0.17494	0.919871	2	0.957961	0.989491	2	11.2912	1.03552	2	2.12217
A0A8C2P6T6	Carboxypeptidase Q OS=Capra hircus OX=9925 PE=4 SV=1 - [A0A8C2P6T6_CAPHI]	0	1.79	7	1	1	1	1.29181	1		1.05889	1		1.09456	1		1.05005	1		1.0463	1		0.931253	1		1.00594	1		0.93852	1		0.93899	1		1.0335	1		0.952931	1		0.999642	1		0.947143	1		0.959754	1
A0A8C2NQE4	SCY1 like pseudokinase 2 OS=Capra hircus OX=9925 PE=4 SV=1 - [A0A8C2NQE4_CAPHI]	0	3.4	5	1	1	1	1.12226	1		1.19211	1		1.09526	1		1.20535	1		0.942702	1		0.855129	1		0.984934	1		1.02631	1		0.898481	1		0.849915	1		0.862489	1		1.04635	1		1.14715	1		0.938451	1
A0A8C2SHI8	Centriolar coiled-coil protein 110 OS=Capra hircus OX=9925 PE=4 SV=1 - [A0A8C2SHI8_CAPHI]	0	2.34	4	1	1	1	0.975809	1		1.18119	1		1.18359	1		0.988232	1		0.775305	1		1.22267	1		0.796098	1		1.07288	1		1.36274	1		1.04443	1		1.16404	1		0.899482	1		0.835532	1		0.894889	1
A0A8C2XY66	Glutathione peroxidase OS=Capra hircus OX=9925 PE=3 SV=1 - [A0A8C2XY66_CAPHI]	0	13.86	3	2	2	5	1.04773	5	5.88897	0.944004	5	8.02468	0.966559	5	16.703	0.927551	5	3.7674	0.943462	5	5.78723	0.989409	5	8.76981	1.00428	5	6.93265	0.945971	5	8.10116	1.03509	5	6.63026	0.971475	5	3.08223	0.987692	5	4.76102	1.01964	5	4.84906	1.05313	5	5.3381	1.1002	5	11.8559
A0A8C2RMU3	Annexin OS=Capra hircus OX=9925 PE=3 SV=1 - [A0A8C2RMU3_CAPHI]	0	2.43	5	1	1	1	0.777502	1		0.83985	1		1.16415	1		0.970801	1		1.19726	1		1.25687	1		0.802469	1		1.1501	1		0.827954	1		1.13603	1		1.05641	1		1.07194	1		1.03795	1		0.829622	1
A0A8C2Y3W7	PEAK family member 3 OS=Capra hircus OX=9925 PE=4 SV=1 - [A0A8C2Y3W7_CAPHI]	0	2.19	3	1	1	1	0.963861	1		0.968117	1		0.968989	1		0.93766	1		0.955733	1		0.936452	1		1.01499	1		0.97638	1		1.11613	1		1.05309	1		0.958677	1		1.01349	1		1.05583	1		1.05105	1
A0A8C2RZZ4	Lysosome-associated membrane glycoprotein 1 OS=Capra hircus OX=9925 PE=3 SV=1 - [A0A8C2RZZ4_CAPHI]	0	2.26	2	1	1	1	1.12067	1		0.966636	1		1.07761	1		1.16696	1		0.990047	1		0.981784	1		1.04727	1		0.981195	1		0.99973	1		1.00748	1		0.889537	1		1.08754	1		1.03578	1		0.874711	1
A0A8C2R7T0	Calponin-homology (CH) domain-containing protein OS=Capra hircus OX=9925 PE=3 SV=1 - [A0A8C2R7T0_CAPHI]	0	1.53	15	1	2	2	0.895638	1		1.1233	1		1.0456	1		0.897718	1		0.934348	1		1.04457	1		1.05631	1		1.20158	1		1.10449	1		1.00163	1		0.998876	1		0.920177	1		1.07173	1		0.795307	1
A0A8C2PG25	Muscle associated receptor tyrosine kinase OS=Capra hircus OX=9925 PE=4 SV=1 - [A0A8C2PG25_CAPHI]	0	2.47	5	1	1	1	0.948498	1		0.90141	1		0.793821	1		0.999594	1		0.804432	1		1.01082	1		1.19957	1		1.05353	1		1.11363	1		0.909971	1		1.26578	1		1.0898	1		0.845314	1		1.03509	1
A0A8C2QXD9	DENN domain containing 6B OS=Capra hircus OX=9925 PE=4 SV=1 - [A0A8C2QXD9_CAPHI]	0	1.49	6	1	1	1	1.00693	1		1.06096	1		0.941444	1		1.0273	1		0.989625	1		0.92981	1		0.961961	1		0.944324	1		1.02333	1		0.990479	1		0.921987	1		1.14265	1		1.0547	1		1.02184	1
A0A8C2PCF0	DnaJ heat shock protein family (Hsp40) member B6 OS=Capra hircus OX=9925 GN=DNAJB6 PE=4 SV=1 - [A0A8C2PCF0_CAPHI]	0	3.6	8	1	1	1	0.766018	1		1.48873	1		1.3279	1		0.861023	1		1.50359	1		1.26492	1		0.725083	1		1.16946	1		0.693866	1		1.19181	1		1.13338	1		1.15022	1		0.646027	1		0.686932	1
A0A8C2P7U3	Alpha-mannosidase OS=Capra hircus OX=9925 PE=3 SV=1 - [A0A8C2P7U3_CAPHI]	0	0.83	4	1	1	1	1.00653	1		0.906468	1		1.06927	1		0.97509	1		0.99251	1		1.04928	1		0.988284	1		1.11705	1		1.08969	1		0.944398	1		1.04114	1		0.999689	1		0.902707	1		1.02858	1
A0A8C2S932	Laminin subunit alpha 3 OS=Capra hircus OX=9925 PE=4 SV=1 - [A0A8C2S932_CAPHI]	0	0.42	6	1	1	1	0.985948	1		1.05368	1		1.00802	1		1.00773	1		0.980123	1		1.04551	1		1.00552	1		1.02413	1		1.09707	1		0.986759	1		1.06972	1		0.941624	1		0.947503	1		0.987231	1
A0A8C2RPE6	SAM and SH3 domain containing 1 OS=Capra hircus OX=9925 GN=SASH1 PE=4 SV=1 - [A0A8C2RPE6_CAPHI]	0	0.69	11	1	1	1	0.795182	1		0.931183	1		1.06036	1		0.760188	1		1.04186	1		1.20141	1		0.879653	1		1.21409	1		0.898478	1		1.1394	1		1.09486	1		1.25515	1		0.868878	1		0.950509	1
A0A8C2SGT5	ATP binding cassette subfamily A member 6 OS=Capra hircus OX=9925 PE=4 SV=1 - [A0A8C2SGT5_CAPHI]	0	0.55	9	1	1	1	0.909527	1		0.936467	1		0.884232	1		0.898021	1		0.884304	1		1.08079	1		1.06211	1		1.05594	1		1.06791	1		1.01992	1		1.10453	1		0.988792	1		1.07961	1		1.08349	1
A0A8C2RRP4	Trio Rho guanine nucleotide exchange factor OS=Capra hircus OX=9925 PE=4 SV=1 - [A0A8C2RRP4_CAPHI]	0	0.28	9	1	1	1	1.86498	1		1.85271	1		1.83455	1		1.79072	1		1.87939	1		0.716292	1		0.738016	1		0.631763	1		0.653273	1		0.58206	1		0.635609	1		0.505329	1		0.534024	1		0.767082	1
A0A8C2N805	Myosin heavy chain 9 OS=Capra hircus OX=9925 PE=3 SV=1 - [A0A8C2N805_CAPHI]	0	0.79	8	1	1	1	0.961146	1		1.00286	1		0.961074	1		0.900481	1		0.939787	1		1.08775	1		0.949681	1		0.997983	1		1.04092	1		1.10862	1		1.05696	1		0.936619	1		1.19287	1		0.96023	1
A0A8C2R6S8	Peptidyl-tRNA hydrolase 1 homolog OS=Capra hircus OX=9925 PE=4 SV=1 - [A0A8C2R6S8_CAPHI]	0	6.01	3	1	1	1	0.899791	1		0.935889	1		1.02847	1		0.895661	1		1.00264	1		1.02037	1		1.04942	1		0.920429	1		1.12389	1		0.984514	1		0.98359	1		1.0131	1		1.08615	1		1.03097	1
A0A8C2RP57	Zinc finger protein 84 OS=Capra hircus OX=9925 PE=4 SV=1 - [A0A8C2RP57_CAPHI]	0	1.56	4	1	1	1	0.816377	1		0.804374	1		0.81893	1		0.874	1		0.846681	1		1	1		1.07069	1		1.05394	1		1.13017	1		1.04691	1		1.18085	1		1.04445	1		1.09941	1		1.11953	1
A0A8C2XUL0	creatine kinase OS=Capra hircus OX=9925 PE=3 SV=1 - [A0A8C2XUL0_CAPHI]	0	2.66	3	1	1	1	1.09213	1		1.04873	1		1.07608	1		1.05335	1		1.06064	1		0.864973	1		0.895521	1		0.903309	1		0.867729	1		1.09639	1		0.832224	1		1.15812	1		1.03099	1		1.09018	1
A0A8C2RD32	Leucine rich repeat containing 49 OS=Capra hircus OX=9925 PE=4 SV=1 - [A0A8C2RD32_CAPHI]	0	2.27	7	1	1	1	1.02476	1		0.927512	1		1.05329	1		0.984876	1		1.04731	1		0.985677	1		1.11438	1		0.880853	1		1.00395	1		1.13388	1		0.880121	1		1.05721	1		0.993986	1		1.08029	1
A0A8C2Y1E6	Sulfotransferase OS=Capra hircus OX=9925 GN=LOC102183750 PE=3 SV=1 - [A0A8C2Y1E6_CAPHI]	0	5.2	3	1	1	1	1.01379	1		0.932562	1		0.997664	1		1.07964	1		0.971412	1		1.04764	1		1.02232	1		1.02052	1		1.02414	1		0.942058	1		1.03051	1		0.939251	1		1.07596	1		1.01855	1
A0A8C2QUL2	KAT8 regulatory NSL complex subunit 3 OS=Capra hircus OX=9925 GN=KANSL3 PE=4 SV=1 - [A0A8C2QUL2_CAPHI]	0	1.65	6	1	1	1	0.911145	1		0.849892	1		0.867631	1		0.837263	1		0.82042	1		0.669656	1		0.637679	1		0.633747	1		0.637611	1		1.47498	1		0.656603	1		1.39396	1		1.46613	1		1.49766	1
A0A8C2P7S5	Natural killer cell triggering receptor OS=Capra hircus OX=9925 GN=NKTR PE=4 SV=1 - [A0A8C2P7S5_CAPHI]	0	0.8	7	1	1	1	0.984123	1		0.980781	1		0.9619	1		1.08583	1		1.04007	1		0.943307	1		1.00675	1		0.974696	1		0.936847	1		1.06241	1		0.915536	1		1.03737	1		1.03833	1		0.987271	1
A0A8C2N8T6	ceramidase OS=Capra hircus OX=9925 GN=NAAA PE=3 SV=1 - [A0A8C2N8T6_CAPHI]	0	3.01	5	1	1	1	0.993417	1		1.02862	1		0.989106	1		1.13063	1		1.03057	1		0.913052	1		0.992937	1		1.048	1		0.98332	1		0.955654	1		0.961286	1		1.02326	1		1.01159	1		0.954796	1
A0A8C2RMW0	Nudix hydrolase 16 like 1 OS=Capra hircus OX=9925 PE=4 SV=1 - [A0A8C2RMW0_CAPHI]	0	5.18	3	1	1	1	0.980879	1		0.958768	1		0.972201	1		0.931529	1		0.96502	1		1.15814	1		1.03168	1		1.02367	1		1.16186	1		0.941416	1		1.04982	1		1.0112	1		0.863234	1		1.02123	1
A0A8C2S9B1	Aldehyde dehydrogenase 1 family member L1 OS=Capra hircus OX=9925 PE=3 SV=1 - [A0A8C2S9B1_CAPHI]	0	1.87	3	1	1	1	0.917077	1		0.90507	1		0.94719	1		1.03898	1		1.00195	1		0.867111	1		1.13734	1		1.05669	1		0.877647	1		1.11963	1		1.04819	1		1.02833	1		1.06141	1		0.986433	1
A0A8C2PL10	Collagen type III alpha 1 chain OS=Capra hircus OX=9925 PE=4 SV=1 - [A0A8C2PL10_CAPHI]	0	0.95	2	1	1	1	1.08236	1		1.22746	1		1.14809	1		1.13771	1		1.08094	1		0.800243	1		0.869555	1		0.816404	1		0.893814	1		1.04346	1		0.799122	1		0.985471	1		1.0419	1		1.09192	1
A0A8C2Y2C1	Protein transport protein sec16 OS=Capra hircus OX=9925 PE=3 SV=1 - [A0A8C2Y2C1_CAPHI]	0	0.24	5	1	1	1	0.866277	1		0.867227	1		0.854222	1		0.804035	1		0.855604	1		1.1967	1		1.31754	1		1.24859	1		1.30693	1		0.864882	1		1.2727	1		0.895258	1		1.01	1		0.844708	1
A0A8C2RJV0	Microtubule associated protein 1S OS=Capra hircus OX=9925 PE=4 SV=1 - [A0A8C2RJV0_CAPHI]	0	0.94	2	1	1	1	0.816763	1		1.03582	1		1.17088	1		0.744861	1		1.02597	1		1.19741	1		0.697565	1		1.30395	1		0.675854	1		1.30978	1		1.30621	1		1.22671	1		0.928588	1		0.832136	1
A0A8C2RWJ1	Intracisternal A particle-promoted polypeptide OS=Capra hircus OX=9925 PE=4 SV=1 - [A0A8C2RWJ1_CAPHI]	0	1.68	5	1	1	1	0.459669	1		1.18211	1		1.38861	1		0.62232	1		1.42041	1		1.254	1		0.549212	1		1.43364	1		0.663244	1		1.55859	1		1.19463	1		1.33113	1		0.682418	1		0.625956	1
A0A8C2NT12	Lysine acetyltransferase 14 OS=Capra hircus OX=9925 PE=4 SV=1 - [A0A8C2NT12_CAPHI]	0	0.78	4	1	1	2	0.890167	2	7.04365	0.896734	2	9.17703	0.853491	2	2.56399	0.889535	2	1.28787	0.877949	2	1.41171	1.21732	2	0.167709	1.22049	2	0.692654	1.19881	2	0.794945	1.3102	2	0.727116	0.892789	2	1.36111	1.22964	2	0.856178	0.92773	2	0.463158	0.884081	2	0.248999	0.895094	2	8.47737
A0A8C2P724	Zinc finger protein 862 OS=Capra hircus OX=9925 PE=4 SV=1 - [A0A8C2P724_CAPHI]	0	0.86	4	1	1	1	1.117	1		0.931728	1		0.963597	1		0.948471	1		1.0019	1		1.04373	1		1.02475	1		1.04617	1		1.03742	1		0.878513	1		1.05146	1		1.00796	1		0.964152	1		1.04617	1
A0A8C2RS69	Sodium channel protein OS=Capra hircus OX=9925 PE=3 SV=1 - [A0A8C2RS69_CAPHI]	0	0.61	15	1	1	1	1.17684	1		1.14738	1		1.15068	1		1.01267	1		1.17488	1		0.889603	1		0.817327	1		0.966934	1		0.677808	1		1.0832	1		0.940154	1		0.930564	1		1.0513	1		1.00837	1
A0A8C2R2R7	Leucine rich repeats and IQ motif containing 1 OS=Capra hircus OX=9925 PE=4 SV=1 - [A0A8C2R2R7_CAPHI]	0	0.46	2	1	1	1	0.888249	1		1.07122	1		0.961844	1		0.95315	1		1.19134	1		1.20137	1		1.04507	1		1.22013	1		0.667566	1		1.02967	1		1.00098	1		1.05592	1		0.969249	1		0.979086	1
A0A8C2PN72	Keratin 23 OS=Capra hircus OX=9925 PE=3 SV=1 - [A0A8C2PN72_CAPHI]	0	2.74	3	1	1	1	1.10968	1		0.826422	1		1.0367	1		0.847504	1		0.928024	1		1.0472	1		1.14434	1		0.974802	1		1.00943	1		1.1043	1		1.24831	1		0.925869	1		0.797688	1		0.920158	1
A0A8C2SD24	HECT-type E3 ubiquitin transferase OS=Capra hircus OX=9925 PE=4 SV=1 - [A0A8C2SD24_CAPHI]	0	2.29	5	1	1	1	0.888009	1		0.929266	1		0.951167	1		0.927144	1		0.980372	1		1.09893	1		1.08123	1		1.08588	1		1.13105	1		0.945651	1		1.01431	1		0.964241	1		1.00204	1		1.09283	1
A0A8C2NXH3	Dolichyl-phosphate-mannose--protein mannosyltransferase OS=Capra hircus OX=9925 PE=3 SV=1 - [A0A8C2NXH3_CAPHI]	0	1.54	8	1	1	1	1.19496	1		0.458118	1		1.4528	1		0.393482	1		1.33452	1		1.31942	1		1.02717	1		0.938432	1		0.530704	1		1.47601	1		1.22721	1		0.974572	1		0.962032	1		1.0206	1
A0A8C2RE17	Carboxypeptidase D OS=Capra hircus OX=9925 PE=3 SV=1 - [A0A8C2RE17_CAPHI]	0	0.8	3	1	1	1	0.494806	1		1.43826	1		1.46518	1		0.620153	1		1.43569	1		1.37107	1		0.470259	1		1.48732	1		0.54553	1		1.42246	1		1.42164	1		1.4301	1		0.467882	1		0.551078	1
A0A8C2RYV8	Epoxide hydrolase 2 OS=Capra hircus OX=9925 PE=4 SV=1 - [A0A8C2RYV8_CAPHI]	0	1.98	5	1	1	1	0.725337	1		1.05944	1		1.25794	1		0.687419	1		1.13707	1		1.38585	1		0.695704	1		1.46431	1		0.796935	1		1.19583	1		1.42855	1		1.32583	1		0.603304	1		0.61397	1
A0A8C2NLZ2	Mitochondrial ribosomal protein L44 OS=Capra hircus OX=9925 PE=4 SV=1 - [A0A8C2NLZ2_CAPHI]	0	3.65	4	1	1	1	0.952781	1		1.01815	1		0.959004	1		1.04733	1		0.863933	1		1.02606	1		1.09234	1		1.17715	1		1.0544	1		0.994898	1		1.11451	1		0.9126	1		0.991497	1		1.01973	1
A0A8C2SCE0	S-formylglutathione hydrolase OS=Capra hircus OX=9925 PE=3 SV=1 - [A0A8C2SCE0_CAPHI]	0	5.24	3	1	1	1	0.668468	1		0.984957	1		0.940832	1		1.0352	1		0.873189	1		1.11471	1		0.970745	1		0.720048	1		0.899095	1		1.25573	1		1.03389	1		1.1494	1		1.0029	1		1.30191	1
A0A8C2QSZ9	Fibrinogen C-terminal domain-containing protein OS=Capra hircus OX=9925 GN=ANGPTL3 PE=4 SV=1 - [A0A8C2QSZ9_CAPHI]	0	4.51	4	2	2	2	0.934482	2	7.29508	0.901486	2	14.1526	0.807759	2	22.0862	0.918879	2	11.5242	0.886955	2	18.0693	1.15968	2	14.7037	1.14757	2	21.5873	1.20696	2	18.4278	1.23675	2	14.6303	0.895221	2	3.08489	1.19225	2	13.0144	0.931553	2	7.82089	0.973278	2	3.97025	0.904441	2	11.9623
A0A8C2R9Q4	Carbonic anhydrase OS=Capra hircus OX=9925 PE=3 SV=1 - [A0A8C2R9Q4_CAPHI]	0	10.94	2	1	1	2	0.979951	2	0.645923	1.09597	2	1.79645	1.02419	2	3.28149	1.08788	2	6.95985	1.03581	2	2.87721	0.963107	2	1.78924	0.8748	2	8.50048	0.898528	2	3.58396	0.91562	2	15.6056	1.05271	2	1.6379	0.950531	2	0.101276	1.04064	2	3.60176	1.06036	2	3.78756	1.06892	2	0.954641
A0A8C2QQQ6	Neutral cholesterol ester hydrolase 1 OS=Capra hircus OX=9925 PE=3 SV=1 - [A0A8C2QQQ6_CAPHI]	0	4.05	4	1	1	2	0.970885	2	3.07374	0.977312	2	2.77979	0.843884	2	8.65088	1.05351	2	18.0856	0.918716	2	5.12712	1.09873	2	2.11147	1.09658	2	1.71622	1.19522	2	7.72715	1.17416	2	4.22096	0.999103	2	0.0447505	1.07066	2	4.29442	0.969217	2	13.1313	0.976758	2	3.46681	0.875508	2	12.5339
A0A8C2QUA6	WD repeat domain 1 OS=Capra hircus OX=9925 PE=4 SV=1 - [A0A8C2QUA6_CAPHI]	0	4.54	2	1	1	1	0.815083	1		0.956555	1		0.76919	1		0.892827	1		0.845459	1		1.08408	1		1.11439	1		1.32598	1		1.05285	1		1.06637	1		1.27201	1		1.06324	1		1.17544	1		0.832191	1
A0A8C2SCZ5	Ig-like domain-containing protein OS=Capra hircus OX=9925 PE=4 SV=1 - [A0A8C2SCZ5_CAPHI]	0	2.72	1	1	1	1	1.10693	1		0.931405	1		1.00696	1		1.09146	1		0.978864	1		1.00209	1		1.11674	1		1.03244	1		1.11299	1		1.04618	1		1.0916	1		0.868064	1		0.95299	1		0.950399	1
A0A8C2R898	Acid phosphatase 3 OS=Capra hircus OX=9925 PE=4 SV=1 - [A0A8C2R898_CAPHI]	0	4.66	5	1	1	2	0.976868	2	4.04776	0.983833	2	4.60402	0.925262	2	4.81262	0.998694	2	8.97422	0.991384	2	2.69893	0.978015	2	3.05475	0.958297	2	6.24789	0.946438	2	2.83789	0.991634	2	1.96767	1.05191	2	8.8705	0.970652	2	5.21652	1.02151	2	1.2367	1.077	2	4.75824	1.08163	2	1.37361
A0A8C2NAA2	Rac GTPase activating protein 1 OS=Capra hircus OX=9925 GN=RACGAP1 PE=4 SV=1 - [A0A8C2NAA2_CAPHI]	0	3.47	4	1	1	1	0.803155	1		0.770694	1		0.79457	1		1.11822	1		1.08222	1		1.01564	1		1.17797	1		0.975335	1		1.1543	1		0.849533	1		1.03269	1		0.818448	1		1.10618	1		1.06951	1
A0A8C2SGX2	Secreted protein OS=Capra hircus OX=9925 PE=4 SV=1 - [A0A8C2SGX2_CAPHI]	0	21.36	1	1	1	6	1.00034	6	17.6917	0.856426	6	4.69782	0.867597	6	1.58899	0.943711	6	6.4694	0.844662	6	10.346	1.07403	6	2.40336	1.10907	6	10.3797	1.12456	6	3.56946	1.15288	6	4.76732	0.969738	6	10.9717	1.04834	6	10.3741	0.952648	6	4.50027	1.03427	6	4.94147	1.01793	6	6.96134
A0A8C2N920	ADP ribosylation factor GTPase activating protein 3 OS=Capra hircus OX=9925 PE=4 SV=1 - [A0A8C2N920_CAPHI]	0	4.54	8	1	1	1	1.06254	1		1.11515	1		1.07455	1		1.25419	1		1.0649	1		0.932548	1		0.947219	1		0.852325	1		0.956585	1		1.05562	1		0.924268	1		0.958896	1		0.988498	1		1.03082	1
A0A8C2NI18	Nicastrin OS=Capra hircus OX=9925 PE=3 SV=1 - [A0A8C2NI18_CAPHI]	0	2.59	1	1	1	1	0.632933	1		1.12329	1		0.475247	1		0.948723	1		0.657615	1		1.32391	1		0.518594	1		1.08173	1		1.13544	1		0.932809	1		1.38438	1		1.63447	1		0.978095	1		0.857333	1
A0A8C2NIJ1	Olfactory receptor OS=Capra hircus OX=9925 PE=3 SV=1 - [A0A8C2NIJ1_CAPHI]	0	6.98	4	1	1	1	1.32145	1		1.25298	1		1.27969	1		1.27324	1		1.2392	1		0.997289	1		1.06269	1		1.03831	1		1.04808	1		0.764772	1		1.1029	1		0.707352	1		0.795532	1		0.679358	1
A0A8C2R674	PRELI/MSF1 domain-containing protein OS=Capra hircus OX=9925 PE=4 SV=1 - [A0A8C2R674_CAPHI]	0	7.62	2	1	1	2	1.06518	1		1.09462	1		1.10369	1		1.15081	1		1.15613	1		0.876237	1		0.922211	1		0.909759	1		0.911019	1		1.00733	1		0.927685	1		0.929013	1		1.07844	1		1.02519	1
A0A8C2NZG8	Sideroflexin 1 OS=Capra hircus OX=9925 PE=3 SV=1 - [A0A8C2NZG8_CAPHI]	0	6.37	7	1	1	1	1.05614	1		1.12915	1		1.00202	1		1.17518	1		0.997934	1		0.874607	1		0.794489	1		0.920523	1		0.831854	1		0.979832	1		0.997193	1		0.97182	1		1.25538	1		1.00351	1
A0A8C2SDE0	4'-phosphopantetheine phosphatase OS=Capra hircus OX=9925 PE=3 SV=1 - [A0A8C2SDE0_CAPHI]	0	2.6	4	1	1	1	1.07573	1		1.06775	1		1.04871	1		1.0931	1		1.03436	1		1.14879	1		1.10106	1		1.11124	1		1.11004	1		0.863797	1		1.11631	1		0.817229	1		0.866199	1		0.89569	1
A0A8C2P2G1	PC-esterase domain containing 1A OS=Capra hircus OX=9925 PE=4 SV=1 - [A0A8C2P2G1_CAPHI]	0	1.48	3	1	1	1	0.975655	1		1.06691	1		1.04677	1		0.979885	1		1.0338	1		0.976495	1		1.04674	1		0.96061	1		1.0756	1		0.960677	1		1.01049	1		0.988768	1		0.944503	1		1.03099	1
A0A8C2RXV8	Collagen type VI alpha 3 chain OS=Capra hircus OX=9925 PE=4 SV=1 - [A0A8C2RXV8_CAPHI]	0	1.39	11	1	1	1	1.05357	1		0.788687	1		1.30636	1		1.0277	1		0.943734	1		0.955338	1		0.975428	1		0.973002	1		1.00406	1		1.08513	1		1.10405	1		0.874568	1		1.02153	1		1.05571	1
A0A8C2QSP8	Olfactory receptor OS=Capra hircus OX=9925 PE=3 SV=1 - [A0A8C2QSP8_CAPHI]	0	6.8	1	1	1	2	0.897255	1		0.849727	1		1.00419	1		1.02015	1		1.03296	1		1.10792	1		1.10726	1		0.991984	1		0.959519	1		0.898794	1		0.90949	1		1.0628	1		1.08329	1		0.963747	1
A0A8C2PDQ3	NPC intracellular cholesterol transporter 2 OS=Capra hircus OX=9925 GN=NPC2 PE=3 SV=1 - [A0A8C2PDQ3_CAPHI]	0	17.04	2	1	1	1	1.15091	1		1.00547	1		0.803562	1		0.807625	1		1.005	1		0.868359	1		1.12973	1		1.2315	1		1.11354	1		0.969041	1		0.970889	1		0.971586	1		0.890689	1		1.2129	1
A0A8C2RZC8	ABC transmembrane type-1 domain-containing protein OS=Capra hircus OX=9925 PE=4 SV=1 - [A0A8C2RZC8_CAPHI]	0	2.64	3	1	1	1	1.01383	1		0.753205	1		0.945481	1		0.864976	1		1.11454	1		1.14386	1		1.07386	1		1.01767	1		0.843089	1		0.831677	1		0.959125	1		1.1197	1		1.33713	1		1.08685	1
A0A8C2SMR8	WD repeat-containing protein 7 OS=Capra hircus OX=9925 PE=4 SV=1 - [A0A8C2SMR8_CAPHI]	0	4.75	1	1	1	1	0.878504	1		0.903428	1		0.919922	1		1.00637	1		0.814972	1		1.2208	1		1.19179	1		1.0795	1		1.14897	1		0.86362	1		1.14171	1		1.08739	1		0.928596	1		0.937456	1
A0A8C2PA67	C2H2-type domain-containing protein OS=Capra hircus OX=9925 PE=4 SV=1 - [A0A8C2PA67_CAPHI]	0	11.22	2	1	1	2	0.925665	2	0.0257862	1.00181	2	4.30465	0.948728	2	0.764997	0.885951	2	5.4452	1.00051	2	6.70695	0.989681	2	5.42494	0.916975	2	4.04944	0.953803	2	0.503607	0.975272	2	2.36028	1.00513	2	2.12406	1.00507	2	4.85601	1.04396	2	15.8445	1.17627	2	2.71268	1.13894	2	1.548
A0A8C2P1D7	Clock circadian regulator OS=Capra hircus OX=9925 PE=4 SV=1 - [A0A8C2P1D7_CAPHI]	0	2.56	4	1	1	1	0.386428	1		0.923328	1		1.4317	1		0.578091	1		1.14945	1		0.967023	1		1.04999	1		1.36602	1		0.637654	1		1.24433	1		1.34859	1		1.13427	1		0.791217	1		1.10652	1
A0A8C2QRV6	Olfactory receptor OS=Capra hircus OX=9925 GN=LOC102186645 PE=3 SV=1 - [A0A8C2QRV6_CAPHI]	0	7.28	2	1	1	3	0.982908	3	21.5719	0.982401	3	3.03152	0.811122	3	6.52403	1.01906	3	11.6425	0.908841	3	2.94259	0.964056	3	0.723799	1.03388	3	4.03133	0.912612	3	16.1084	0.96805	3	8.53782	1.03535	3	3.39028	1.04855	3	4.05347	1.09519	3	12.8608	1.08241	3	6.32874	1.06815	3	1.36326
A0A8C2NXU0	Cell adhesion molecule 1 OS=Capra hircus OX=9925 PE=4 SV=1 - [A0A8C2NXU0_CAPHI]	0	6.94	9	1	1	1	1.23426	1		0.847408	1		0.895277	1		0.94523	1		0.979067	1		0.882475	1		1.1025	1		0.92145	1		0.890419	1		1.18998	1		1.00047	1		1.12323	1		0.958012	1		0.996348	1
A0A8C2NMM7	Cystatin domain-containing protein OS=Capra hircus OX=9925 PE=3 SV=1 - [A0A8C2NMM7_CAPHI]	0	22.34	2	1	1	1	0.83931	1		0.980107	1		0.931817	1		0.858377	1		0.938676	1		0.983458	1		1.04375	1		1.24861	1		0.948042	1		1.20559	1		1.08769	1		1.05595	1		0.985196	1		0.977951	1
A0A8C2RU06	MAGE domain-containing protein OS=Capra hircus OX=9925 PE=4 SV=1 - [A0A8C2RU06_CAPHI]	0	10.64	1	1	1	1	0.764791	1		0.848293	1		0.85755	1		0.972705	1		0.898692	1		1.16858	1		1.14158	1		1.23674	1		1.16701	1		0.925634	1		1.24807	1		0.95617	1		1.12279	1		0.885012	1
A0A8C2RUV8	MAGE domain-containing protein OS=Capra hircus OX=9925 PE=4 SV=1 - [A0A8C2RUV8_CAPHI]	0	8.82	1	1	1	1	1.13141	1		1.21978	1		0.910341	1		1.10857	1		0.978564	1		0.854823	1		0.954912	1		0.981072	1		1.25797	1		0.968077	1		1.00831	1		0.812675	1		0.998034	1		1.16405	1
A0A8C2S1H1	Anion exchange protein OS=Capra hircus OX=9925 PE=3 SV=1 - [A0A8C2S1H1_CAPHI]	0	6.67	9	3	3	5	0.945293	5	5.83146	0.930336	5	1.79959	0.931323	5	1.53902	1.01937	5	5.01702	0.993862	5	3.83212	1.09971	5	4.47256	1.12358	5	1.16067	1.068	5	5.18357	1.27686	5	12.9233	0.907338	5	6.21	1.11595	5	7.46935	0.91991	5	11.1862	0.963409	5	3.19402	0.943156	5	8.75794
A0A8C2NV98	poly(A)-specific ribonuclease OS=Capra hircus OX=9925 PE=3 SV=1 - [A0A8C2NV98_CAPHI]	0	2.32	3	1	1	1	1.09931	1		1.02608	1		1.05654	1		0.993674	1		1	1		0.984108	1		1.05672	1		0.987341	1		1.04211	1		0.93864	1		1.04733	1		0.964881	1		0.976539	1		0.944072	1
A0A8C2NU26	Heterogeneous nuclear ribonucleoprotein H1 OS=Capra hircus OX=9925 PE=4 SV=1 - [A0A8C2NU26_CAPHI]	0	14.43	2	1	1	1	1.12091	1		1.02909	1		0.940324	1		1.07159	1		0.949433	1		0.942913	1		1.15541	1		1.01557	1		1.02267	1		0.774696	1		1.13759	1		0.94383	1		1.06758	1		1.10503	1
A0A8C2S649	C17orf99 Ig domain-containing protein OS=Capra hircus OX=9925 PE=4 SV=1 - [A0A8C2S649_CAPHI]	0	12.97	2	1	1	1	0.906164	1		1.03026	1		0.513884	1		1.12803	1		1.17987	1		1.06639	1		0.913623	1		1.13558	1		1.24325	1		0.966925	1		1.13622	1		0.999554	1		1.04786	1		0.616575	1
A0A8C2Y0T6	Chromosome 8 open reading frame 33 OS=Capra hircus OX=9925 PE=3 SV=1 - [A0A8C2Y0T6_CAPHI]	0	15.74	1	1	1	1				1.42193	1		1.04129	1		0.849174	1		1.18269	1		1.01716	1		1.18293	1		0.933482	1		0.617382	1		1.52354	1		1.33554	1					0.738693	1		1.40618	1
A0A8C2QQG7	2-amino-3-carboxymuconate-6-semialdehyde decarboxylase OS=Capra hircus OX=9925 PE=3 SV=1 - [A0A8C2QQG7_CAPHI]	0	11.19	7	1	1	1	1.00247	1		0.970792	1		1.20768	1		1.14405	1		0.724748	1		1.03346	1		1.20865	1		1.16045	1		1.11221	1		1.01639	1		0.912607	1		0.786674	1		0.8611	1		0.992437	1
A0A8C2RYI3	Tubby-like protein OS=Capra hircus OX=9925 PE=3 SV=1 - [A0A8C2RYI3_CAPHI]	0	6.97	1	1	1	1	0.87899	1		0.975212	1		1.11435	1		1.01527	1		0.79619	1		0.83486	1		1.00204	1		1.13029	1		0.848513	1		1.2434	1		1.28232	1		0.929929	1		0.896188	1		0.993288	1
A0A8C2REW2	SPARC like 1 OS=Capra hircus OX=9925 PE=3 SV=1 - [A0A8C2REW2_CAPHI]	0	2.1	7	1	1	1	0.895542	1		0.904278	1		1.01263	1		1.11391	1		0.821483	1		1.10581	1		1.20507	1		1.04692	1		1.04171	1		0.859883	1		0.982291	1		0.95839	1		1.14941	1		0.911568	1
A0A8C2R812	DnaJ homolog subfamily C member 2 OS=Capra hircus OX=9925 PE=4 SV=1 - [A0A8C2R812_CAPHI]	0	1	4	1	1	1	1.06587	1		1.01636	1		1.01871	1		0.964659	1		1.0364	1		1.00553	1		1.10015	1		1.03946	1		1.14476	1		0.866112	1		1.00735	1		0.919965	1		0.967579	1		0.963728	1
A0A8C2R2L0	Peroxiredoxin like 2A OS=Capra hircus OX=9925 PE=4 SV=1 - [A0A8C2R2L0_CAPHI]	0	12.56	1	1	1	1	0.88206	1		0.831933	1		0.896642	1		0.783974	1		0.903026	1		1.20108	1		1.00489	1		1.15517	1		1.14062	1		1.11119	1		1.00993	1		1.16573	1		1.0497	1		0.973459	1
A0A8C2PHN9	Peptidase S1 domain-containing protein OS=Capra hircus OX=9925 PE=4 SV=1 - [A0A8C2PHN9_CAPHI]	0	4.2	2	1	1	1	1.05015	1		1.01253	1		0.837441	1		1.10281	1		1.14528	1		1.01591	1		0.919886	1		0.969491	1		0.907733	1		0.981047	1		1.021	1		1.03228	1		0.984132	1		0.965945	1
A0A8C2NCV6	Solute carrier family 4 member 8 OS=Capra hircus OX=9925 PE=3 SV=1 - [A0A8C2NCV6_CAPHI]	0	2.5	3	1	1	2	0.915339	2	4.13629	0.580641	2	56.0996	1.09527	2	3.21995	0.940188	2	32.9582	0.907974	2	15.2084	1.14362	2	20.1537	1.10805	2	0.926698	1.03307	2	14.9944	1.17518	2	10.6283	0.902011	2	9.02103	1.262	2	11.9846	0.935617	2	5.86578	1.09166	2	15.8681	0.887647	2	9.37598
A0A8C2SGQ3	Tyrosine-protein kinase OS=Capra hircus OX=9925 PE=3 SV=1 - [A0A8C2SGQ3_CAPHI]	0	1.71	4	1	1	1	1.04707	1		0.865864	1		1.00829	1		0.995714	1		0.91355	1		0.877077	1		0.951179	1		0.867204	1		0.905011	1		1.24079	1		0.815762	1		1.23281	1		1.08838	1		1.02005	1
A0A8C2P6T9	Sulfotransferase OS=Capra hircus OX=9925 PE=3 SV=1 - [A0A8C2P6T9_CAPHI]	0	3.83	1	1	1	1	0.859915	1		1.03395	1		0.905823	1		0.897437	1		0.932975	1		0.916711	1		0.78652	1		1.29717	1		1.07048	1		1.10306	1		0.947511	1		1.06385	1		0.940804	1		0.988814	1
A0A8C2PLP8	WD repeat domain 11 OS=Capra hircus OX=9925 PE=4 SV=1 - [A0A8C2PLP8_CAPHI]	0	4.61	1	1	1	1	0.791407	1		0.800044	1		0.754799	1		0.870794	1		0.799913	1		1.27118	1		1.31734	1		1.28593	1		1.36756	1		0.858992	1		1.40658	1		0.882796	1		0.936653	1		0.884841	1
A0A8C2RR91	WD repeat-containing protein 45 OS=Capra hircus OX=9925 PE=4 SV=1 - [A0A8C2RR91_CAPHI]	0	2.84	34	1	1	1
A0A8C2NJ91	Cathepsin B OS=Capra hircus OX=9925 PE=3 SV=1 - [A0A8C2NJ91_CAPHI]	0	1.9	4	1	1	1	1.1091	1		1.19793	1		1.18654	1		1.1414	1		1.24958	1		1.02997	1		0.886398	1		0.804936	1		0.953088	1		0.953202	1		0.81331	1		0.965078	1		1.0024	1		0.935826	1
A0A8C2RZJ9	Ig-like domain-containing protein OS=Capra hircus OX=9925 PE=4 SV=1 - [A0A8C2RZJ9_CAPHI]	0	6.36	1	1	1	1	0.913446	1		0.882045	1		1.05552	1		0.730601	1		1.46292	1		0.828672	1		0.833148	1		0.663428	1		0.572143	1		0.896185	1		0.626186	1		1.57355	1		0.587559	1		1.89846	1
A0A8C2N7M6	SH3 domain-containing protein OS=Capra hircus OX=9925 PE=4 SV=1 - [A0A8C2N7M6_CAPHI]	0	11.76	3	1	1	2	1.03812	2	1.03279	0.997469	2	1.96537	0.876267	2	19.376	0.847392	2	7.32031	0.979162	2	26.3589	0.996366	2	22.5877	1.13961	2	0.180868	1.0991	2	15.2907	1.12578	2	18.3935	1.01783	2	8.46354	1.13339	2	8.43885	1.03637	2	23.5119	0.890365	2	7.89313	0.95124	2	3.89186
A0A8C2NC87	NAD(P)(+)--arginine ADP-ribosyltransferase OS=Capra hircus OX=9925 GN=ART3 PE=3 SV=1 - [A0A8C2NC87_CAPHI]	0	4.39	11	1	1	2	1.03261	2	4.86511	0.935124	2	1.58435	0.986609	2	5.51053	1.14992	2	10.2362	0.931151	2	11.5274	0.99442	2	0.706333	0.924578	2	3.32523	0.980282	2	2.01775	1.09167	2	0.763948	0.915728	2	13.4226	1.01488	2	1.78741	0.985628	2	0.679895	1.12811	2	11.7383	0.930534	2	7.19915
A0A8C2P744	ATP binding cassette subfamily E member 1 OS=Capra hircus OX=9925 PE=4 SV=1 - [A0A8C2P744_CAPHI]	0	2.08	3	1	1	1	1.00089	1		1.17371	1		1.1129	1		1.11104	1		0.968907	1		1.02039	1		0.79207	1		0.843886	1		0.997676	1		1.04856	1		1.07702	1		1.01208	1		0.978959	1		0.932267	1
A0A8C2NH39	Leukotriene A4 hydrolase OS=Capra hircus OX=9925 PE=3 SV=1 - [A0A8C2NH39_CAPHI]	0	3.76	5	2	2	3	1.03635	3	5.29528	1.00974	3	2.906	1.01468	3	9.74126	1.06923	3	0.489589	1.01213	3	0.781012	0.963988	3	1.37409	0.995447	3	1.43153	0.943262	3	2.28589	1.01877	3	4.29426	1.02421	3	1.98046	0.963931	3	5.39653	0.9611	3	6.60619	1.03471	3	6.49412	1.0064	3	4.3886
A0A8C2PAM1	Caspase-3 OS=Capra hircus OX=9925 GN=CASP3 PE=3 SV=1 - [A0A8C2PAM1_CAPHI]	0	4.17	2	1	1	1	0.985695	1		1.0035	1		0.959948	1		1.03551	1		1.06194	1		0.963934	1		1.02726	1		0.97271	1		0.964567	1		0.965862	1		1.01995	1		1.03165	1		1.07153	1		1.01756	1
A0A8C2RPZ7	Family with sequence similarity 180 member B OS=Capra hircus OX=9925 PE=4 SV=1 - [A0A8C2RPZ7_CAPHI]	0	23.86	1	1	1	1	0.516734	1		0.473477	1		0.522881	1		0.559128	1		1.08166	1		1.01406	1		1.29676	1		1.21553	1		1.46743	1		0.917328	1		1.64136	1		0.62659	1		0.987438	1		1.08677	1
A0A8C2Y163	CD34 molecule OS=Capra hircus OX=9925 GN=CD34 PE=4 SV=1 - [A0A8C2Y163_CAPHI]	0	2.27	5	1	1	1	0.965595	1		0.945861	1		0.896621	1		0.863605	1		0.974745	1		1.12696	1		1.22078	1		1.1525	1		1.19593	1		0.921366	1		1.06182	1		0.892302	1		0.942456	1		0.987079	1
A0A8C2RZ28	RUN domain containing 3B OS=Capra hircus OX=9925 PE=4 SV=1 - [A0A8C2RZ28_CAPHI]	0	2.07	5	1	1	2	0.981524	2	3.75419	0.963477	2	4.52227	0.986091	2	2.44536	0.959835	2	7.47493	1.00887	2	7.15943	1.06096	2	0.855603	1.04781	2	3.49652	1.071	2	7.92741	1.06366	2	1.75421	0.949883	2	1.67873	1.01225	2	2.88045	0.979883	2	1.24174	0.996277	2	5.7697	0.994031	2	0.326082
A0A8C2RSR7	Uncharacterized protein OS=Capra hircus OX=9925 PE=4 SV=1 - [A0A8C2RSR7_CAPHI]	0	9.8	1	1	1	1	0.726781	1		0.90595	1		1.06886	1		0.860496	1		1.05331	1		1.00644	1		0.862952	1		0.879471	1		0.917083	1		0.867264	1		0.850546	1		2.45862	1		0.735339	1		0.86265	1
A0A8C2P0A7	Junctophilin 3 OS=Capra hircus OX=9925 PE=3 SV=1 - [A0A8C2P0A7_CAPHI]	0	22.58	3	1	1	1	0.867301	1		1.66837	1		0.975421	1		0.840731	1		0.617672	1		0.861555	1		0.914814	1		0.581344	1		1.8301	1		0.826147	1		0.805677	1		1.99933	1		0.692683	1		0.791563	1
[truncated: 6 more columns]
